# Supplementary material for: Tex264 Binding to SNX27 Regulates Itgα5 Receptor Membrane Recycling and Affects Cell Migration
Source: PubMed Central journal article supplement (PMC9274233; doi:10.1155/2022/4304419), 2022-07-04
Supplement: 4304419.f1.pdf [file 4304419.f1.pdf]

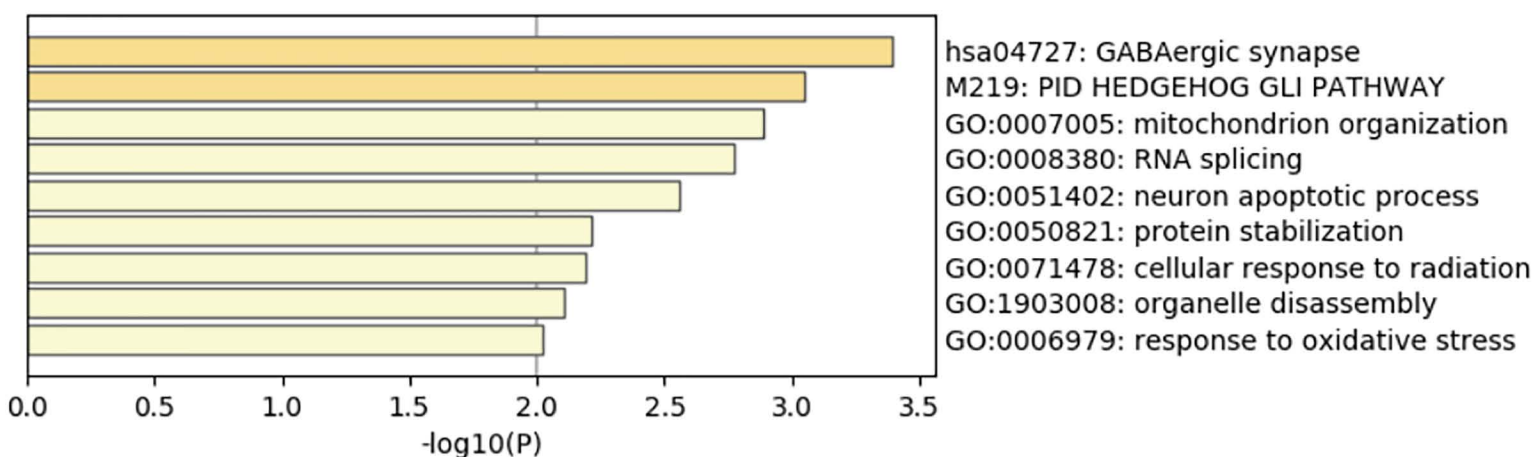

| GO         | Category                | Description                    | Count | %    | Log <sub>10</sub> (P) | Log <sub>10</sub> (q) |
|------------|-------------------------|--------------------------------|-------|------|-----------------------|-----------------------|
| hsa04727   | KEGG Pathway            | GABAergic synapse              | 4     | 4.21 | -3.39                 | 0.00                  |
| M219       | Canonical Pathways      | PID HEDGEHOG GLI PATHWAY       | 3     | 3.16 | -3.05                 | 0.00                  |
| GO:0007005 | GO Biological Processes | mitochondrion organization     | 8     | 8.42 | -2.89                 | 0.00                  |
| GO:0008380 | GO Biological Processes | RNA splicing                   | 7     | 7.37 | -2.77                 | 0.00                  |
| GO:0051402 | GO Biological Processes | neuron apoptotic process       | 5     | 5.26 | -2.56                 | 0.00                  |
| GO:0050821 | GO Biological Processes | protein stabilization          | 4     | 4.21 | -2.21                 | 0.00                  |
| GO:0071478 | GO Biological Processes | cellular response to radiation | 4     | 4.21 | -2.19                 | 0.00                  |
| GO:1903008 | GO Biological Processes | organelle disassembly          | 3     | 3.16 | -2.11                 | 0.00                  |
| GO:0006979 | GO Biological Processes | response to oxidative stress   | 6     | 6.32 | -2.02                 | 0.00                  |
