# Supplementary material for: Tex264 Binding to SNX27 Regulates Itgα5 Receptor Membrane Recycling and Affects Cell Migration
Source: PubMed Central journal article supplement (PMC9274233; doi:10.1155/2022/4304419), 2022-07-04

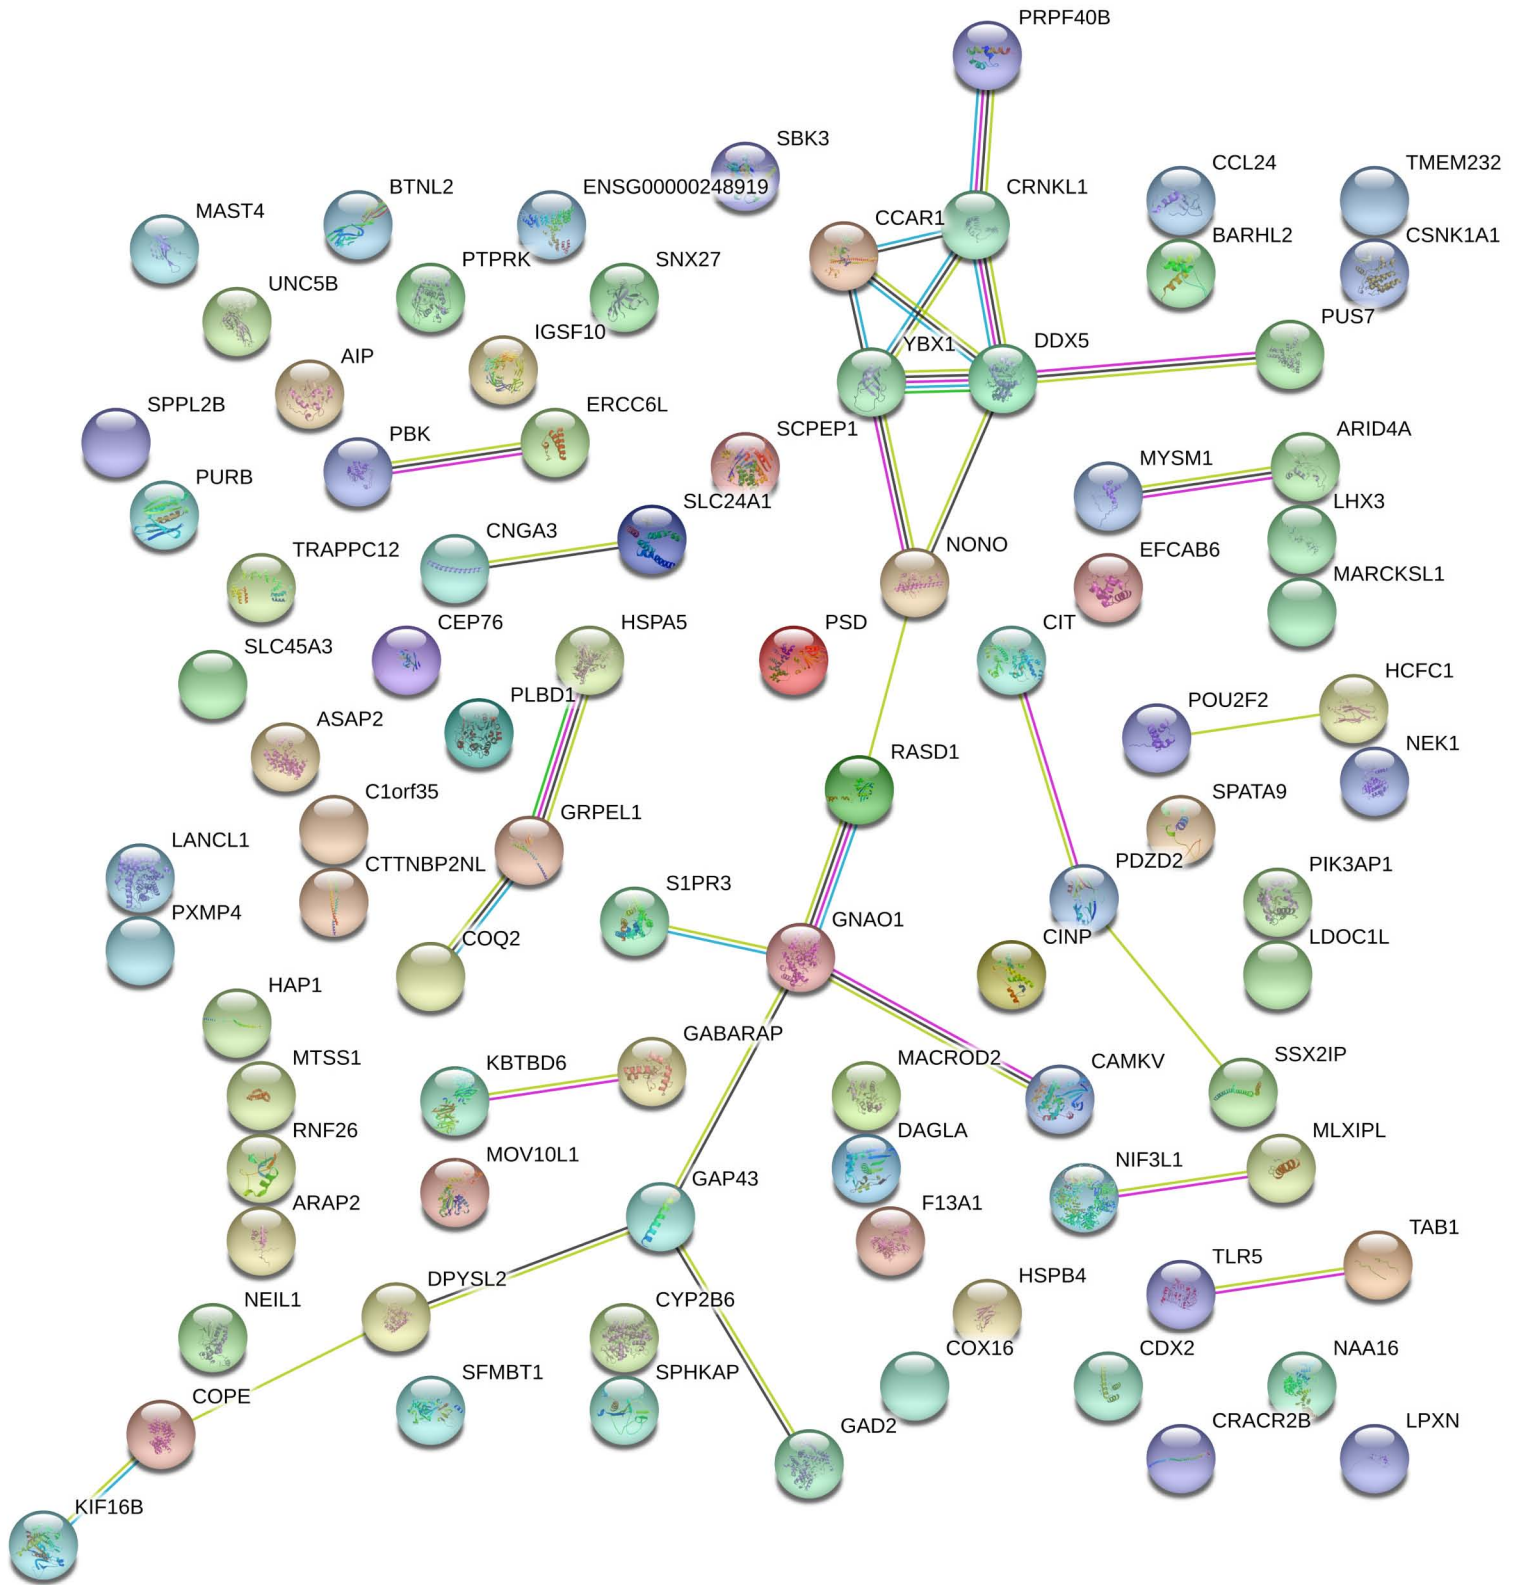

Supplement: 4304419.f2.pdf [file 4304419.f2.pdf]
