# Supplementary material for: Tex264 Binding to SNX27 Regulates Itgα5 Receptor Membrane Recycling and Affects Cell Migration
Source: PubMed Central journal article supplement (PMC9274233; doi:10.1155/2022/4304419), 2022-07-04
Supplement: 4304419.f4.pdf [file 4304419.f4.pdf]

## Cellular Component

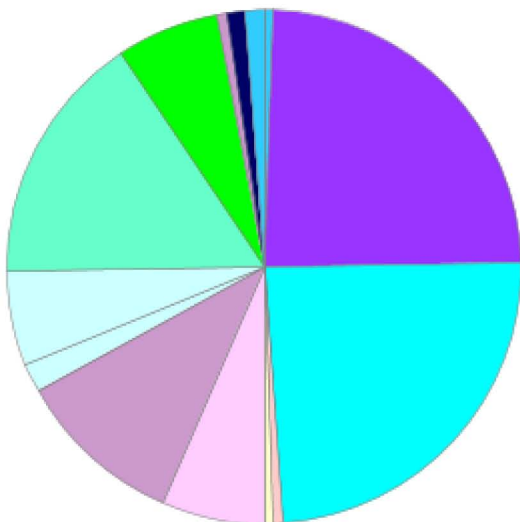

- [cell junction \(GO:0030054\)](#)
- [cell part \(GO:0044464\)](#)
- [cell \(GO:0005623\)](#)
- [extracellular region part \(GO:0044421\)](#)
- [extracellular region \(GO:0005576\)](#)
- [membrane part \(GO:0044425\)](#)
- [membrane \(GO:0016020\)](#)
- [membrane-enclosed lumen \(GO:0031974\)](#)
- [organelle part \(GO:0044422\)](#)
- [organelle \(GO:0043226\)](#)
- [protein-containing complex \(GO:0032991\)](#)
- [supramolecular complex \(GO:0099080\)](#)
- [synapse part \(GO:0044456\)](#)
- [synapse \(GO:0045202\)](#)

## Biological Process

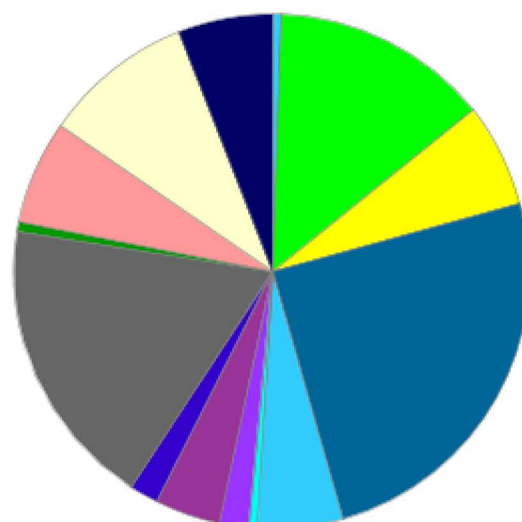

- [biological adhesion \(GO:0022610\)](#)
- [biological regulation \(GO:0065007\)](#)
- [cellular component organization or biogenesis \(GO:0071840\)](#)
- [cellular process \(GO:0009987\)](#)
- [developmental process \(GO:0032502\)](#)
- [growth \(GO:0040007\)](#)
- [immune system process \(GO:0002376\)](#)
- [localization \(GO:0051179\)](#)
- [locomotion \(GO:0040011\)](#)
- [metabolic process \(GO:0008152\)](#)
- [multi-organism process \(GO:0051704\)](#)
- [multicellular organismal process \(GO:0032501\)](#)
- [response to stimulus \(GO:0050896\)](#)
- [signaling \(GO:0023052\)](#)
