# Supplementary material for: Tex264 Binding to SNX27 Regulates Itgα5 Receptor Membrane Recycling and Affects Cell Migration
Source: PubMed Central journal article supplement (PMC9274233; doi:10.1155/2022/4304419), 2022-07-04
Supplement: 4304419.f5.pdf [file 4304419.f5.pdf]

Protein Class

Molecular Function

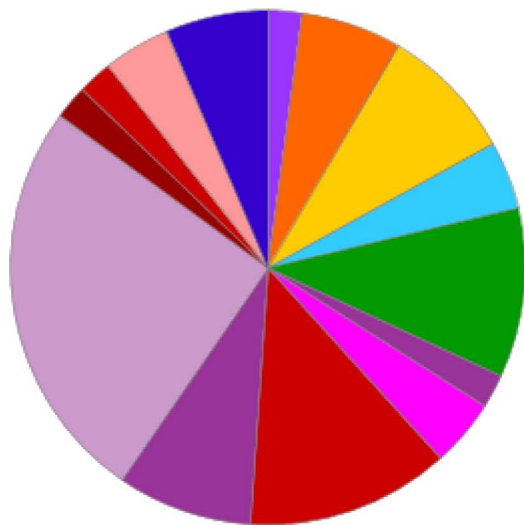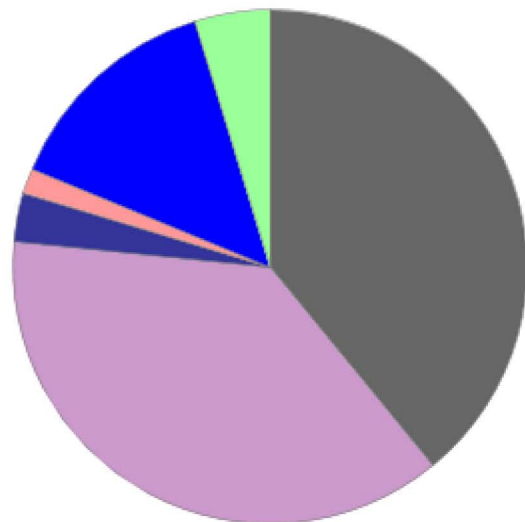

- [chaperone \(PC00072\)](#)
- [chromatin/chromatin-binding, or -regulatory protein \(PC00077\)](#)
- [cytoskeletal protein \(PC00085\)](#)
- [defense/immunity protein \(PC00090\)](#)
- [gene-specific transcriptional regulator \(PC00264\)](#)
- [intercellular signal molecule \(PC00207\)](#)
- [membrane traffic protein \(PC00150\)](#)
- [metabolite interconversion enzyme \(PC00262\)](#)
- [nucleic acid binding protein \(PC00171\)](#)
- [protein modifying enzyme \(PC00260\)](#)
- [protein-binding activity modulator \(PC00095\)](#)
- [scaffold/adaptor protein \(PC00226\)](#)
- [transmembrane signal receptor \(PC00197\)](#)
- [transporter \(PC00227\)](#)

- [binding \(GO:0005488\)](#)
- [catalytic activity \(GO:0003824\)](#)
- [molecular function regulator \(GO:0098772\)](#)
- [molecular transducer activity \(GO:0060089\)](#)
- [transcription regulator activity \(GO:0140110\)](#)
- [transporter activity \(GO:0005215\)](#)
