# Supplementary material for: Tex264 Binding to SNX27 Regulates Itgα5 Receptor Membrane Recycling and Affects Cell Migration
Source: PubMed Central journal article supplement (PMC9274233; doi:10.1155/2022/4304419), 2022-07-04
Supplement: 4304419.f6.pdf [file 4304419.f6.pdf]

| Reference | PepCount            | UniquePeptides | CoverPerc | MW     | PI      | Score | DeltaScore |
|-----------|---------------------|----------------|-----------|--------|---------|-------|------------|
| FileScan  | Sequence            | MH+            | Diff(MH+) | Charge | Rank    |       |            |
| \$1-1     | tr Q5XIFC           | 286            | 18        | 71.20% | 33770.6 | 4.94  |            |
|           | R15076_4_K.CWELVEA  | 3597.625       | -0.00086  |        | 3       | 1     | 33.64      |
|           | R15076_4_K.CWELVEA  | 3597.625       | -0.00086  |        | 3       | 1     | 53.24      |
|           | R15076_4_K.CWELVEA  | 3597.625       | 0.00641   |        | 4       | 1     | 20.66      |
|           | R15076_4_K.CWELVEA  | 3597.625       | -0.00086  |        | 3       | 1     | 55.18      |
|           | R15076_4_K.CWELVEA  | 3597.625       | -0.00086  |        | 3       | 1     | 105.22     |
|           | R15076_4_K.CWELVEA  | 3597.625       | -0.00086  |        | 3       | 1     | 65.57      |
|           | R15076_4_K.FHVGPHYC | 2427.129       | -0.01688  |        | 3       | 1     | 65.35      |
|           | R15076_4_K.FHVGPHYC | 2427.129       | -0.00436  |        | 4       | 1     | 43.85      |
|           | R15076_4_K.FHVGPHYC | 2427.129       | -0.00125  |        | 3       | 1     | 76.81      |
|           | R15076_4_K.FHVGPHYC | 2427.129       | -0.0041   |        | 2       | 1     | 154.32     |
|           | R15076_4_K.FHVGPHYC | 2427.129       | -0.00257  |        | 3       | 1     | 96.51      |
|           | R15076_4_K.FHVGPHYC | 2427.129       | -0.0096   |        | 4       | 1     | 89.06      |
|           | R15076_4_K.FHVGPHYC | 2427.129       | -0.00434  |        | 2       | 1     | 154.48     |
|           | R15076_4_K.FHVGPHYC | 2427.129       | -0.00146  |        | 2       | 1     | 129.39     |
|           | R15076_4_K.FHVGPHYC | 2427.129       | -0.00278  |        | 3       | 1     | 81.91      |
|           | R15076_4_K.FHVGPHYC | 2427.129       | -0.0055   |        | 2       | 1     | 140.98     |
|           | R15076_4_K.FHVGPHYC | 2427.129       | -0.00215  |        | 3       | 1     | 97.94      |
|           | R15076_4_K.FHVGPHYC | 2427.129       | -0.0006   |        | 2       | 1     | 107.77     |
|           | R15076_4_K.FHVGPHYC | 2427.129       | -0.00154  |        | 2       | 1     | 160.12     |
|           | R15076_4_K.FHVGPHYC | 2427.129       | -0.00161  |        | 3       | 1     | 94.04      |
|           | R15076_4_K.FHVGPHYC | 2427.129       | -0.00284  |        | 3       | 1     | 83.19      |
|           | R15076_4_K.FHVGPHYC | 2427.129       | -0.00116  |        | 3       | 1     | 92.27      |
|           | R15076_4_K.FHVGPHYC | 2427.129       | -0.00302  |        | 2       | 1     | 142.79     |
|           | R15076_4_K.FHVGPHYC | 2427.129       | 0.00166   |        | 3       | 1     | 50.7       |
|           | R15076_4_K.FHVGPHYC | 2427.129       | 0.00694   |        | 3       | 1     | 69.74      |
|           | R15076_4_K.FHVGPHYC | 2427.129       | -0.00416  |        | 2       | 1     | 95.59      |
|           | R15076_4_K.FHVGPHYC | 2427.129       | -0.00053  |        | 3       | 1     | 85.84      |
|           | R15076_4_K.FHVGPHYC | 2427.129       | -0.00416  |        | 2       | 1     | 109.16     |
|           | R15076_4_K.FHVGPHYC | 2427.129       | 0.01584   |        | 2       | 1     | 68.35      |
|           | R15076_4_K.FHVGPHYC | 2427.129       | 0.01312   |        | 3       | 1     | 68.26      |
|           | R15076_4_K.FHVGPHYC | 2427.129       | 0.01312   |        | 3       | 1     | 81.1       |
|           | R15076_4_K.FHVGPHYC | 2427.129       | 0.01312   |        | 3       | 1     | 98.01      |
|           | R15076_4_K.FHVGPHYC | 2427.129       | 0.00082   |        | 3       | 1     | 81.77      |
|           | R15076_4_K.FHVGPHYC | 2427.129       | -0.00416  |        | 2       | 1     | 65.07      |
|           | R15076_4_K.FHVGPHYC | 2427.129       | 0.01312   |        | 3       | 1     | 81.12      |
|           | R15076_4_K.FHVGPHYC | 2427.129       | -0.00074  |        | 3       | 1     | 85.63      |
|           | R15076_4_K.FHVGPHYC | 2427.129       | -0.0063   |        | 2       | 1     | 62.54      |
|           | R15076_4_K.FHVGPHYC | 2427.129       | -0.00119  |        | 3       | 1     | 91.68      |
|           | R15076_4_K.FHVGPHYC | 2427.129       | -0.00416  |        | 2       | 1     | 24.8       |
|           | R15076_4_K.FHVGPHYC | 2427.129       | 0.00118   |        | 3       | 1     | 94         |
|           | R15076_4_K.LCAHPR   | 753.3824       | 0.00018   |        | 2       | 1     | 33         |
|           | R15076_4_K.LIASPR   | 656.409        | -0.00064  |        | 2       | 1     | 40.96      |
|           | R15076_4_R.AWDDGDM  | 948.3806       | -0.01213  |        | 2       | 1     | 30.38      |
|           | R15076_4_R.AWDDGDM  | 948.3806       | -0.00131  |        | 2       | 1     | 41.96      |
|           | R15076_4_R.CAVGSII  | 2643.297       | -0.00115  |        | 4       | 1     | 49.4       |
|           | R15076_4_R.CAVGSII  | 2643.297       | 0.0043    |        | 2       | 1     | 24.8       |
|           | R15076_4_R.CAVGSII  | 2643.297       | 0.00158   |        | 3       | 1     | 87.97      |
|           | R15076_4_R.CAVGSII  | 2643.297       | -0.00058  |        | 3       | 1     | 20.52      |
|           | R15076_4_R.CAVGSII  | 2643.297       | -0.00114  |        | 2       | 1     | 94.81      |
|           | R15076_4_R.CAVGSII  | 2643.297       | -0.00331  |        | 4       | 1     | 45.69      |
|           | R15076_4_R.CAVGSII  | 2643.297       | -0.00138  |        | 2       | 1     | 111.44     |

|                    |          |          |   |   |        |   |
|--------------------|----------|----------|---|---|--------|---|
| R15076_4_R.CAVGSII | 2643.297 | -0.00307 | 3 | 1 | 74.48  | 0 |
| R15076_4_R.CAVGSII | 2643.297 | -0.00203 | 4 | 1 | 70.08  | 0 |
| R15076_4_R.CAVGSII | 2643.297 | -0.00356 | 2 | 1 | 115.14 | 0 |
| R15076_4_R.CAVGSII | 2643.297 | -0.00307 | 4 | 1 | 48.74  | 0 |
| R15076_4_R.CAVGSII | 2643.297 | -0.0025  | 3 | 1 | 22.5   | 0 |
| R15076_4_R.CAVGSII | 2643.297 | -0.003   | 2 | 1 | 99.42  | 0 |
| R15076_4_R.CAVGSII | 2643.297 | -0.00337 | 3 | 1 | 65.2   | 0 |
| R15076_4_R.CAVGSII | 2643.297 | -0.00322 | 2 | 1 | 112.13 | 0 |
| R15076_4_R.CAVGSII | 2643.297 | -0.0022  | 3 | 1 | 72.3   | 0 |
| R15076_4_R.CAVGSII | 2643.297 | -0.0042  | 2 | 1 | 128.51 | 0 |
| R15076_4_R.CAVGSII | 2643.297 | -0.00115 | 4 | 1 | 36.17  | 0 |
| R15076_4_R.CAVGSII | 2643.297 | -0.00088 | 3 | 1 | 52.64  | 0 |
| R15076_4_R.CAVGSII | 2643.297 | 0.0043   | 2 | 1 | 98.36  | 0 |
| R15076_4_R.CAVGSII | 2643.297 | -0.00145 | 3 | 1 | 52.02  | 0 |
| R15076_4_R.CAVGSII | 2643.297 | 0.0043   | 2 | 1 | 60.83  | 0 |
| R15076_4_R.CAVGSII | 2643.297 | -0.00019 | 3 | 1 | 51.82  | 0 |
| R15076_4_R.CAVGSII | 2643.297 | -0.00115 | 4 | 1 | 29.39  | 0 |
| R15076_4_R.CAVGSII | 2643.297 | 0.0043   | 2 | 1 | 70.67  | 0 |
| R15076_4_R.CAVGSII | 2643.297 | -0.00016 | 3 | 1 | 67.81  | 0 |
| R15076_4_R.CAVGSII | 2643.297 | 0.0043   | 2 | 1 | 39.13  | 0 |
| R15076_4_R.CAVGSII | 2643.297 | 0.00158  | 3 | 1 | 65.6   | 0 |
| R15076_4_R.CAVGSII | 2643.297 | 0.00158  | 3 | 1 | 77.49  | 0 |
| R15076_4_R.CAVGSII | 2643.297 | 0.00158  | 3 | 1 | 78.86  | 0 |
| R15076_4_R.CAVGSII | 2643.297 | -0.00226 | 3 | 1 | 69.11  | 0 |
| R15076_4_R.CAVGSII | 2643.297 | -0.00175 | 3 | 1 | 53.54  | 0 |
| R15076_4_R.ELSTPEF | 831.4207 | -0.00031 | 2 | 1 | 30.49  | 0 |
| R15076_4_R.ELSTPEF | 1146.527 | -0.00163 | 2 | 1 | 21.19  | 0 |
| R15076_4_R.ETSATPF | 1421.666 | -0.00158 | 2 | 1 | 50.58  | 0 |
| R15076_4_R.ETSATPF | 1421.666 | -0.00718 | 2 | 1 | 52.27  | 0 |
| R15076_4_R.ETSATPF | 1421.666 | -0.00312 | 3 | 1 | 40.82  | 0 |
| R15076_4_R.ETSATPF | 1421.666 | -0.00188 | 2 | 1 | 51.2   | 0 |
| R15076_4_R.ETSATPF | 1421.666 | -0.00718 | 2 | 1 | 51.5   | 0 |
| R15076_4_R.ETSATPF | 1421.666 | -0.00718 | 2 | 1 | 36.22  | 0 |
| R15076_4_R.ETSATPF | 1421.666 | -0.00718 | 2 | 1 | 30.88  | 0 |
| R15076_4_R.ETSATPF | 1421.666 | -0.00718 | 2 | 1 | 43.04  | 0 |
| R15076_4_R.KLCAHPF | 881.4774 | 0.00001  | 2 | 1 | 36.06  | 0 |
| R15076_4_R.LEIYQQI | 2178.047 | -0.00841 | 3 | 1 | 49.96  | 0 |
| R15076_4_R.LEIYQQI | 2178.047 | -0.00841 | 3 | 1 | 54.44  | 0 |
| R15076_4_R.LEIYQQI | 2178.047 | -0.00568 | 2 | 1 | 48.84  | 0 |
| R15076_4_R.LEIYQQI | 2178.047 | -0.00841 | 3 | 1 | 29.31  | 0 |
| R15076_4_R.LEIYQQI | 2178.047 | -0.00568 | 2 | 1 | 41.61  | 0 |
| R15076_4_R.LEIYQQI | 2178.047 | -0.00841 | 3 | 1 | 53.83  | 0 |
| R15076_4_R.LEIYQQI | 2178.047 | -0.00073 | 3 | 1 | 50.27  | 0 |
| R15076_4_R.LEIYQQI | 2178.047 | -0.00841 | 3 | 1 | 27.73  | 0 |
| R15076_4_R.LEIYQQI | 2178.047 | -0.00841 | 3 | 1 | 25.01  | 0 |
| R15076_4_R.LEIYQQI | 2162.052 | -0.00052 | 2 | 1 | 127.54 | 0 |
| R15076_4_R.LEIYQQI | 2162.052 | 0.00029  | 3 | 1 | 67.86  | 0 |
| R15076_4_R.LEIYQQI | 2162.052 | -0.00186 | 2 | 1 | 107.38 | 0 |
| R15076_4_R.LEIYQQI | 2162.052 | -0.00042 | 2 | 1 | 141.51 | 0 |
| R15076_4_R.LEIYQQI | 2162.052 | -0.00091 | 3 | 1 | 67.8   | 0 |
| R15076_4_R.LEIYQQI | 2162.052 | -0.00206 | 2 | 1 | 115.12 | 0 |
| R15076_4_R.LEIYQQI | 2162.052 | -0.00148 | 3 | 1 | 71.9   | 0 |
| R15076_4_R.LEIYQQI | 2162.052 | -0.00142 | 2 | 1 | 97.42  | 0 |
| R15076_4_R.LEIYQQI | 2162.052 | -0.00172 | 3 | 1 | 80.9   | 0 |

|                    |          |          |   |   |        |   |
|--------------------|----------|----------|---|---|--------|---|
| R15076_4_R.LEIYQQI | 2162.052 | -0.00172 | 2 | 1 | 101.82 | 0 |
| R15076_4_R.LEIYQQI | 2162.052 | -0.00022 | 3 | 1 | 68.52  | 0 |
| R15076_4_R.LEIYQQI | 2162.052 | 0.00034  | 2 | 1 | 84.9   | 0 |
| R15076_4_R.LEIYQQI | 2162.052 | -0.00166 | 3 | 1 | 74.95  | 0 |
| R15076_4_R.LEIYQQI | 2162.052 | -0.00194 | 2 | 1 | 82.19  | 0 |
| R15076_4_R.LEIYQQI | 2162.052 | -0.00331 | 3 | 1 | 60.13  | 0 |
| R15076_4_R.LEIYQQI | 2162.052 | 0.00266  | 3 | 1 | 88.16  | 0 |
| R15076_4_R.LEIYQQI | 2162.052 | 0.00312  | 2 | 1 | 81.06  | 0 |
| R15076_4_R.LEIYQQI | 2162.052 | -0.00118 | 3 | 1 | 76.04  | 0 |
| R15076_4_R.LEIYQQI | 2162.052 | 0.00032  | 2 | 1 | 81.22  | 0 |
| R15076_4_R.LEIYQQI | 2162.052 | -0.00106 | 3 | 1 | 75.87  | 0 |
| R15076_4_R.LEIYQQI | 2162.052 | 0.00218  | 2 | 1 | 93.1   | 0 |
| R15076_4_R.LEIYQQI | 2162.052 | -0.0004  | 3 | 1 | 83.33  | 0 |
| R15076_4_R.LEIYQQI | 2162.052 | -0.0013  | 2 | 1 | 114.94 | 0 |
| R15076_4_R.LEIYQQI | 2162.052 | -0.00277 | 3 | 1 | 71.52  | 0 |
| R15076_4_R.LEIYQQI | 2162.052 | -0.0019  | 2 | 1 | 106.86 | 0 |
| R15076_4_R.LEIYQQI | 2162.052 | -0.00148 | 3 | 1 | 71.45  | 0 |
| R15076_4_R.LEIYQQI | 2162.052 | 0.0007   | 2 | 1 | 120.38 | 0 |
| R15076_4_R.LEIYQQI | 2162.052 | -0.00163 | 3 | 1 | 81.14  | 0 |
| R15076_4_R.LEIYQQI | 2162.052 | -0.00058 | 3 | 1 | 56.55  | 0 |
| R15076_4_R.LEIYQQI | 2162.052 | -0.0006  | 2 | 1 | 85.4   | 0 |
| R15076_4_R.LEIYQQI | 2162.052 | -0.00118 | 3 | 1 | 62.17  | 0 |
| R15076_4_R.LEIYQQI | 2162.052 | -0.00055 | 3 | 1 | 71.41  | 0 |
| R15076_4_R.LEIYQQI | 2162.052 | 0.00224  | 2 | 1 | 71.18  | 0 |
| R15076_4_R.LEIYQQI | 2162.052 | 0.00212  | 2 | 1 | 84.79  | 0 |
| R15076_4_R.LEIYQQI | 2162.052 | -0.00409 | 3 | 1 | 59.59  | 0 |
| R15076_4_R.LEIYQQI | 2162.052 | 0.0017   | 3 | 1 | 64.34  | 0 |
| R15076_4_R.LEIYQQI | 2162.052 | -0.0006  | 2 | 1 | 102.18 | 0 |
| R15076_4_R.LEIYQQI | 2162.052 | -0.0006  | 2 | 1 | 107.5  | 0 |
| R15076_4_R.NITLAYF | 822.472  | -0.00041 | 2 | 1 | 38.04  | 0 |
| R15076_4_R.NITLAYF | 822.472  | -0.00121 | 2 | 1 | 25.55  | 0 |
| R15076_4_R.NITLAYF | 822.472  | -0.00123 | 2 | 1 | 40.16  | 0 |
| R15076_4_R.NITLAYF | 822.472  | -0.00171 | 2 | 1 | 30.42  | 0 |
| R15076_4_R.NITLAYF | 822.472  | -0.00101 | 2 | 1 | 30.25  | 0 |
| R15076_4_R.NITLAYF | 822.472  | -0.00077 | 2 | 1 | 38.17  | 0 |
| R15076_4_R.NITLAYF | 822.472  | -0.00077 | 2 | 1 | 38.09  | 0 |
| R15076_4_R.NITLAYF | 822.472  | -0.00215 | 2 | 1 | 38.03  | 0 |
| R15076_4_R.NITLAYF | 822.472  | -0.00135 | 2 | 1 | 27.71  | 0 |
| R15076_4_R.NITLAYF | 822.472  | -0.00015 | 2 | 1 | 38.24  | 0 |
| R15076_4_R.NITLAYF | 822.472  | -0.00077 | 2 | 1 | 32.91  | 0 |
| R15076_4_R.NITLAYF | 822.472  | -0.00077 | 2 | 1 | 38.08  | 0 |
| R15076_4_R.NITLAYF | 822.472  | -0.00077 | 2 | 1 | 28.09  | 0 |
| R15076_4_R.NITLAYF | 822.472  | -0.00077 | 2 | 1 | 25.13  | 0 |
| R15076_4_R.NITLAYF | 822.472  | -0.00077 | 2 | 1 | 29.14  | 0 |
| R15076_4_R.NITLAYF | 822.472  | -0.00077 | 2 | 1 | 42.53  | 0 |
| R15076_4_R.NITLAYF | 822.472  | -0.00077 | 2 | 1 | 40.37  | 0 |
| R15076_4_R.NITLAYF | 822.472  | -0.00077 | 2 | 1 | 40.34  | 0 |
| R15076_4_R.NITLAYF | 822.472  | -0.00077 | 2 | 1 | 21.52  | 0 |
| R15076_4_R.NITLAYF | 822.472  | -0.00077 | 2 | 1 | 40.66  | 0 |
| R15076_4_R.NITLAYF | 822.472  | -0.00077 | 2 | 1 | 29.33  | 0 |
| R15076_4_R.NITLAYF | 822.472  | -0.00077 | 2 | 1 | 23.57  | 0 |
| R15076_4_R.NITLAYF | 822.472  | -0.00057 | 2 | 1 | 26.65  | 0 |
| R15076_4_R.NITLAYF | 822.472  | -0.00077 | 2 | 1 | 28.64  | 0 |
| R15076_4_R.NITLAYF | 822.472  | -0.00077 | 2 | 1 | 30.62  | 0 |

|                    |          |          |   |   |        |   |
|--------------------|----------|----------|---|---|--------|---|
| R15076_4_R.QGDFYVF | 1181.584 | -0.0026  | 2 | 1 | 56.33  | 0 |
| R15076_4_R.QGDFYVF | 1181.584 | 0.00827  | 3 | 1 | 27.25  | 0 |
| R15076_4_R.QGDFYVF | 1181.584 | -0.00238 | 2 | 1 | 56.4   | 0 |
| R15076_4_R.QGDFYVF | 1181.584 | -0.00235 | 3 | 1 | 32.15  | 0 |
| R15076_4_R.QGDFYVF | 1181.584 | -0.00242 | 2 | 1 | 66.45  | 0 |
| R15076_4_R.QGDFYVF | 1181.584 | -0.00228 | 2 | 1 | 57.86  | 0 |
| R15076_4_R.QGDFYVF | 1181.584 | -0.0026  | 2 | 1 | 65.58  | 0 |
| R15076_4_R.QGDFYVF | 1181.584 | -0.00024 | 2 | 1 | 64.2   | 0 |
| R15076_4_R.QGDFYVF | 1181.584 | -0.00132 | 2 | 1 | 44.7   | 0 |
| R15076_4_R.QGDFYVF | 1181.584 | -0.009   | 2 | 1 | 24.76  | 0 |
| R15076_4_R.QGDFYVF | 1181.584 | -0.009   | 2 | 1 | 42.47  | 0 |
| R15076_4_R.QGDFYVF | 1181.584 | 0.011    | 2 | 1 | 43.77  | 0 |
| R15076_4_R.QGDFYVF | 1181.584 | -0.009   | 2 | 1 | 35.44  | 0 |
| R15076_4_R.QGDFYVF | 1181.584 | -0.009   | 2 | 1 | 44.96  | 0 |
| R15076_4_R.QGDFYVF | 1181.584 | -0.00108 | 2 | 1 | 68.22  | 0 |
| R15076_4_R.QGDFYVF | 1181.584 | -0.009   | 2 | 1 | 53.28  | 0 |
| R15076_4_R.QGDFYVF | 1181.584 | -0.009   | 2 | 1 | 46.56  | 0 |
| R15076_4_R.QGDFYVF | 1181.584 | -0.009   | 2 | 1 | 47.07  | 0 |
| R15076_4_R.QGDFYVF | 1181.584 | -0.009   | 2 | 1 | 28.32  | 0 |
| R15076_4_R.QGDFYVF | 1181.584 | -0.009   | 2 | 1 | 25.97  | 0 |
| R15076_4_R.QGDFYVF | 1181.584 | -0.009   | 2 | 1 | 28.92  | 0 |
| R15076_4_R.QGDFYVF | 1181.584 | -0.009   | 2 | 1 | 43.28  | 0 |
| R15076_4_R.QGDFYVF | 1181.584 | -0.009   | 2 | 1 | 43.76  | 0 |
| R15076_4_R.QGDFYVF | 1181.584 | -0.009   | 2 | 1 | 40.14  | 0 |
| R15076_4_R.QGDFYVF | 1181.584 | -0.009   | 2 | 1 | 45.16  | 0 |
| R15076_4_R.QGDFYVF | 1696.818 | -0.00518 | 3 | 1 | 40.4   | 0 |
| R15076_4_R.QGDFYVF | 1696.818 | 0.00496  | 2 | 1 | 57.51  | 0 |
| R15076_4_R.RVHPALI | 1310.758 | -0.00398 | 3 | 1 | 25.1   | 0 |
| R15076_4_R.RVHPALI | 1310.758 | 0.00247  | 3 | 1 | 29.66  | 0 |
| R15076_4_R.RVHPALI | 1310.758 | -0.00281 | 2 | 1 | 34.85  | 0 |
| R15076_4_R.RVHPALI | 1310.758 | 0.00247  | 3 | 1 | 35.39  | 0 |
| R15076_4_R.RVHPALI | 1310.758 | 0.00247  | 3 | 1 | 51.5   | 0 |
| R15076_4_R.RVHPALI | 1310.758 | 0.00519  | 2 | 1 | 33.63  | 0 |
| R15076_4_R.RVHPALI | 1310.758 | 0.00247  | 3 | 1 | 32.17  | 0 |
| R15076_4_R.RVHPALI | 1310.758 | 0.00519  | 2 | 1 | 46.3   | 0 |
| R15076_4_R.RVHPALI | 1310.758 | 0.00247  | 3 | 1 | 33.94  | 0 |
| R15076_4_R.RVHPALI | 1310.758 | 0.00519  | 2 | 1 | 20.69  | 0 |
| R15076_4_R.RVHPALI | 1310.758 | 0.00519  | 2 | 1 | 47.44  | 0 |
| R15076_4_R.RVHPALI | 1310.758 | -0.00206 | 3 | 1 | 36.87  | 0 |
| R15076_4_R.RVHPALI | 1310.758 | -0.00135 | 2 | 1 | 31.56  | 0 |
| R15076_4_R.RVHPALI | 1310.758 | -0.00242 | 3 | 1 | 38.19  | 0 |
| R15076_4_R.RVHPALI | 1310.758 | 0.00247  | 3 | 1 | 41.86  | 0 |
| R15076_4_R.RVHPALI | 1310.758 | 0.00247  | 3 | 1 | 39.24  | 0 |
| R15076_4_R.SEHSYSF | 3173.312 | -0.00092 | 3 | 1 | 128.49 | 0 |
| R15076_4_R.SEHSYSF | 3173.312 | -0.02309 | 3 | 1 | 26.89  | 0 |
| R15076_4_R.SEHSYSF | 3173.312 | -0.02309 | 3 | 1 | 28.25  | 0 |
| R15076_4_R.SEHSYSF | 3157.317 | 0.00472  | 2 | 1 | 61.09  | 0 |
| R15076_4_R.SEHSYSF | 3157.317 | 0.00109  | 3 | 1 | 135.16 | 0 |
| R15076_4_R.SEHSYSF | 3157.317 | -0.00134 | 3 | 1 | 113.68 | 0 |
| R15076_4_R.SEHSYSF | 3157.317 | -0.00688 | 2 | 1 | 117.16 | 0 |
| R15076_4_R.SEHSYSF | 3157.317 | -0.00455 | 3 | 1 | 116.37 | 0 |
| R15076_4_R.SEHSYSF | 3157.317 | -0.02073 | 4 | 1 | 83.46  | 0 |
| R15076_4_R.SEHSYSF | 3157.317 | 0.00472  | 2 | 1 | 59.54  | 0 |
| R15076_4_R.SEHSYSF | 3157.317 | 0.00013  | 3 | 1 | 117.27 | 0 |

|                                         |   |   |         |   |
|-----------------------------------------|---|---|---------|---|
| R15076_4_R. SEHSYSF 3157. 317 0. 01927  | 4 | 1 | 57. 79  | 0 |
| R15076_4_R. SEHSYSF 3157. 317 -0. 02073 | 4 | 1 | 35. 97  | 0 |
| R15076_4_R. SEHSYSF 3157. 317 -0. 00029 | 3 | 1 | 124. 28 | 0 |
| R15076_4_R. SEHSYSF 3157. 317 -0. 01528 | 2 | 1 | 89. 85  | 0 |
| R15076_4_R. SEHSYSF 3157. 317 -0. 0029  | 3 | 1 | 121. 56 | 0 |
| R15076_4_R. SEHSYSF 3157. 317 -0. 01528 | 2 | 1 | 67. 26  | 0 |
| R15076_4_R. SEHSYSF 3157. 317 0. 00472  | 2 | 1 | 104. 21 | 0 |
| R15076_4_R. SEHSYSF 3157. 317 0. 01927  | 4 | 1 | 51. 25  | 0 |
| R15076_4_R. SEHSYSF 3157. 317 -0. 00176 | 3 | 1 | 138. 64 | 0 |
| R15076_4_R. SEHSYSF 3157. 317 0. 00472  | 2 | 1 | 107. 2  | 0 |
| R15076_4_R. SEHSYSF 3157. 317 -0. 00155 | 3 | 1 | 117. 6  | 0 |
| R15076_4_R. SEHSYSF 3157. 317 0. 00337  | 3 | 1 | 119. 54 | 0 |
| R15076_4_R. SEHSYSF 3157. 317 -0. 00548 | 3 | 1 | 113. 19 | 0 |
| R15076_4_R. SIAVYYI 1820. 906 -0. 00431 | 2 | 1 | 33. 46  | 0 |
| R15076_4_R. SIAVYYI 1820. 906 -0. 00076 | 3 | 1 | 43. 92  | 0 |
| R15076_4_R. SIAVYYI 1820. 906 -0. 00235 | 2 | 1 | 61. 69  | 0 |
| R15076_4_R. SIAVYYI 1820. 906 0. 00104  | 3 | 1 | 78. 98  | 0 |
| R15076_4_R. SIAVYYI 1820. 906 -0. 00373 | 2 | 1 | 58. 9   | 0 |
| R15076_4_R. SIAVYYI 1820. 906 -0. 00079 | 3 | 1 | 55. 46  | 0 |
| R15076_4_R. SIAVYYI 1820. 906 -0. 00379 | 2 | 1 | 53. 89  | 0 |
| R15076_4_R. SIAVYYI 1820. 906 -0. 00148 | 3 | 1 | 46. 94  | 0 |
| R15076_4_R. SIAVYYI 1820. 906 -0. 00519 | 2 | 1 | 50. 98  | 0 |
| R15076_4_R. SIAVYYI 1820. 906 -0. 00274 | 3 | 1 | 58. 85  | 0 |
| R15076_4_R. SIAVYYI 1820. 906 -0. 00001 | 2 | 1 | 47. 97  | 0 |
| R15076_4_R. SIAVYYI 1820. 906 0. 00104  | 3 | 1 | 49. 86  | 0 |
| R15076_4_R. SIAVYYI 1820. 906 -0. 00187 | 2 | 1 | 51. 83  | 0 |
| R15076_4_R. SIAVYYI 1820. 906 -0. 00033 | 2 | 1 | 54      | 0 |
| R15076_4_R. SIAVYYI 1820. 906 0. 00339  | 2 | 1 | 50. 39  | 0 |
| R15076_4_R. SIAVYYI 1820. 906 0. 00255  | 2 | 1 | 47. 99  | 0 |
| R15076_4_R. SIAVYYI 1820. 906 -0. 00623 | 2 | 1 | 58. 51  | 0 |
| R15076_4_R. SIAVYYI 1820. 906 -0. 00623 | 2 | 1 | 49. 67  | 0 |
| R15076_4_R. SIAVYYI 1820. 906 0. 01377  | 2 | 1 | 38. 77  | 0 |
| R15076_4_R. SIAVYYI 1820. 906 -0. 00385 | 2 | 1 | 63. 17  | 0 |
| R15076_4_R. SIAVYYI 1820. 906 -0. 00623 | 2 | 1 | 48. 72  | 0 |
| R15076_4_R. SIAVYYI 1820. 906 0. 00025  | 2 | 1 | 57. 77  | 0 |
| R15076_4_R. SIAVYYI 1820. 906 -0. 00095 | 2 | 1 | 65. 67  | 0 |
| R15076_4_R. SIAVYYI 1820. 906 -0. 00145 | 2 | 1 | 32. 32  | 0 |
| R15076_4_R. SIAVYYI 1820. 906 -0. 00623 | 2 | 1 | 42. 87  | 0 |
| R15076_4_R. SIAVYYI 1820. 906 -0. 00623 | 2 | 1 | 40. 14  | 0 |
| R15076_4_R. SIAVYYI 1820. 906 -0. 00623 | 2 | 1 | 43. 44  | 0 |
| R15076_4_R. VHPALDV 1154. 657 0. 00409  | 2 | 1 | 31. 46  | 0 |
| R15076_4_R. VHPALDV 1154. 657 -0. 00171 | 3 | 1 | 48. 38  | 0 |
| R15076_4_R. VHPALDV 1154. 657 -0. 00247 | 2 | 1 | 38. 73  | 0 |
| R15076_4_R. VHPALDV 1154. 657 -0. 00084 | 3 | 1 | 47. 61  | 0 |
| R15076_4_R. VHPALDV 1154. 657 -0. 00247 | 2 | 1 | 37. 06  | 0 |
| R15076_4_R. VHPALDV 1154. 657 -0. 00234 | 3 | 1 | 39. 88  | 0 |
| R15076_4_R. VHPALDV 1154. 657 -0. 00253 | 2 | 1 | 34. 85  | 0 |
| R15076_4_R. VHPALDV 1154. 657 -0. 00261 | 3 | 1 | 47. 8   | 0 |
| R15076_4_R. VHPALDV 1154. 657 -0. 00114 | 3 | 1 | 30. 51  | 0 |
| R15076_4_R. VHPALDV 1154. 657 -0. 00169 | 2 | 1 | 33. 52  | 0 |
| R15076_4_R. VHPALDV 1154. 657 -0. 00287 | 2 | 1 | 26. 4   | 0 |
| R15076_4_R. VHPALDV 1154. 657 -0. 00135 | 3 | 1 | 44. 82  | 0 |
| R15076_4_R. VHPALDV 1154. 657 -0. 00269 | 2 | 1 | 34. 26  | 0 |
| R15076_4_R. VHPALDV 1154. 657 -0. 00864 | 3 | 1 | 28. 11  | 0 |

|       |                    |          |          |        |          |       |   |
|-------|--------------------|----------|----------|--------|----------|-------|---|
|       | R15076_4_R.VHPALDV | 1154.657 | -0.00864 | 3      | 1        | 42.5  | 0 |
|       | R15076_4_R.VHPALDV | 1154.657 | -0.00329 | 2      | 1        | 30.88 | 0 |
|       | R15076_4_R.VHPALDV | 1154.657 | 0.00015  | 3      | 1        | 44.78 | 0 |
|       | R15076_4_R.VHPALDV | 1154.657 | 0.00047  | 2      | 1        | 37.33 | 0 |
|       | R15076_4_R.VHPALDV | 1154.657 | -0.00864 | 3      | 1        | 47.89 | 0 |
|       | R15076_4_R.VHPALDV | 1154.657 | 0.00097  | 2      | 1        | 27.24 | 0 |
|       | R15076_4_R.VHPALDV | 1154.657 | -0.00864 | 3      | 1        | 39.97 | 0 |
|       | R15076_4_R.VHPALDV | 1154.657 | -0.00864 | 3      | 1        | 41.16 | 0 |
|       | R15076_4_R.VHPALDV | 1154.657 | 0.00409  | 2      | 1        | 30.13 | 0 |
|       | R15076_4_R.VHPALDV | 1154.657 | -0.00864 | 3      | 1        | 44.79 | 0 |
|       | R15076_4_R.VHPALDV | 1154.657 | 0.00009  | 2      | 1        | 44.54 | 0 |
|       | R15076_4_R.VHPALDV | 1154.657 | -0.00864 | 3      | 1        | 45.48 | 0 |
|       | R15076_4_R.VHPALDV | 1154.657 | -0.00864 | 3      | 1        | 38.68 | 0 |
|       | R15076_4_R.VHPALDV | 1154.657 | -0.00117 | 2      | 1        | 21.22 | 0 |
|       | R15076_4_R.VHPALDV | 1154.657 | -0.00042 | 3      | 1        | 47.8  | 0 |
|       | R15076_4_R.VHPALDV | 1154.657 | -0.00864 | 3      | 1        | 42.23 | 0 |
|       | R15076_4_R.VHPALDV | 1154.657 | -0.00864 | 3      | 1        | 42.31 | 0 |
|       | R15076_4_R.VHPALDV | 1154.657 | -0.00864 | 3      | 1        | 38.74 | 0 |
|       | R15076_4_R.VHPALDV | 1154.657 | -0.00864 | 3      | 1        | 43.98 | 0 |
| \$2-1 | sp P69897          | 18       | 13       | 40.09% | 49670.28 | 4.78  |   |
|       | R15076_4_K.EVDEQM* | 1462.684 | -0.00851 | 2      | 1        | 34.71 | 0 |
|       | R15076_4_K.EVDEQMI | 1446.689 | -0.00343 | 2      | 1        | 46.08 | 0 |
|       | R15076_4_K.IREEYPI | 1077.532 | -0.00313 | 3      | 1        | 33.59 | 0 |
|       | R15076_4_K.LAVNM*v | 1159.629 | -0.0028  | 2      | 1        | 27.72 | 0 |
|       | R15076_4_K.LAVNMVF | 1143.634 | -0.00016 | 2      | 1        | 56.59 | 0 |
|       | R15076_4_K.LTTPTYC | 2708.338 | 0.00279  | 3      | 1        | 28.22 | 0 |
|       | R15076_4_K.NMM*AAC | 1081.422 | -0.00217 | 2      | 1        | 37.23 | 0 |
|       | R15076_4_K.NMMAACI | 1065.427 | -0.00201 | 2      | 1        | 40.18 | 0 |
|       | R15076_4_K.NSSYFVF | 1696.833 | 0.00021  | 2      | 1        | 50.35 | 0 |
|       | R15076_4_R.AILVDLF | 1631.831 | -0.00182 | 2      | 1        | 36.34 | 0 |
|       | R15076_4_R.ALTVPEI | 1659.895 | -0.00209 | 2      | 1        | 47.05 | 0 |
|       | R15076_4_R.FPGQLN* | 1130.595 | 0.00255  | 2      | 1        | 52.18 | 0 |
|       | R15076_4_R.FPGQLN* | 1130.595 | 0.00119  | 2      | 1        | 51.96 | 0 |
|       | R15076_4_R.FPGQLN* | 1130.595 | 0.00255  | 2      | 1        | 40.76 | 0 |
|       | R15076_4_R.IMNTFSV | 1319.703 | -0.00994 | 2      | 1        | 77.19 | 0 |
|       | R15076_4_R.ISEQFTA | 1245.593 | -0.00279 | 2      | 1        | 34.95 | 0 |
|       | R15076_4_R.ISVYYNF | 1301.637 | 0.00446  | 2      | 1        | 70.26 | 0 |
|       | R15076_4_R.SGPFQJ  | 2798.343 | 0.00795  | 3      | 1        | 21.04 | 0 |
| \$3-1 | sp Q3KRE*          | 18       | 13       | 39.78% | 49952.54 | 4.78  |   |
|       | R15076_4_K.EVDEQM* | 1462.684 | -0.00851 | 2      | 1        | 34.71 | 0 |
|       | R15076_4_K.EVDEQMI | 1446.689 | -0.00343 | 2      | 1        | 46.08 | 0 |
|       | R15076_4_K.IREEYPI | 1077.532 | -0.00313 | 3      | 1        | 33.59 | 0 |
|       | R15076_4_K.LAVNM*v | 1159.629 | -0.0028  | 2      | 1        | 27.72 | 0 |
|       | R15076_4_K.LAVNMVF | 1143.634 | -0.00016 | 2      | 1        | 56.59 | 0 |
|       | R15076_4_K.LTTPTYC | 2708.338 | 0.00279  | 3      | 1        | 28.22 | 0 |
|       | R15076_4_K.MSATFIC | 1857.942 | -0.00109 | 2      | 1        | 61.18 | 0 |
|       | R15076_4_K.NMM*AAC | 1081.422 | -0.00217 | 2      | 1        | 37.23 | 0 |
|       | R15076_4_K.NMMAACI | 1065.427 | -0.00201 | 2      | 1        | 40.18 | 0 |
|       | R15076_4_K.NSSYFVF | 1696.833 | 0.00021  | 2      | 1        | 50.35 | 0 |
|       | R15076_4_R.AILVDLF | 1631.831 | -0.00182 | 2      | 1        | 36.34 | 0 |
|       | R15076_4_R.FPGQLN* | 1130.595 | 0.00255  | 2      | 1        | 52.18 | 0 |
|       | R15076_4_R.FPGQLN* | 1130.595 | 0.00119  | 2      | 1        | 51.96 | 0 |
|       | R15076_4_R.FPGQLN* | 1130.595 | 0.00255  | 2      | 1        | 40.76 | 0 |
|       | R15076_4_R.INVYYNF | 1385.67  | -0.00319 | 2      | 1        | 56.44 | 0 |

|       |            |         |          |          |        |          |       |   |
|-------|------------|---------|----------|----------|--------|----------|-------|---|
|       | R15076_4_R | ISEQFTA | 1245.593 | -0.00279 | 2      | 1        | 34.95 | 0 |
|       | R15076_4_R | SGPFGQI | 2798.343 | 0.00795  | 3      | 1        | 21.04 | 0 |
|       | R15076_4_R | YLTVAAL | 1053.609 | -0.0036  | 2      | 1        | 45.97 | 0 |
| \$4-1 | tr G3V7C   |         | 16       | 11       | 34.38% | 49830.48 | 4.79  |   |
|       | R15076_4_K | EVDEQM* | 1462.684 | -0.00851 | 2      | 1        | 34.71 | 0 |
|       | R15076_4_K | EVDEQMI | 1446.689 | -0.00343 | 2      | 1        | 46.08 | 0 |
|       | R15076_4_K | IREEYPI | 1077.532 | -0.00313 | 3      | 1        | 33.59 | 0 |
|       | R15076_4_K | LAVNM*v | 1159.629 | -0.0028  | 2      | 1        | 27.72 | 0 |
|       | R15076_4_K | LAVNMVF | 1143.634 | -0.00016 | 2      | 1        | 56.59 | 0 |
|       | R15076_4_K | LTTPTYC | 2708.338 | 0.00279  | 3      | 1        | 28.22 | 0 |
|       | R15076_4_K | MSATFIC | 1857.942 | -0.00109 | 2      | 1        | 61.18 | 0 |
|       | R15076_4_K | NMM*AAc | 1081.422 | -0.00217 | 2      | 1        | 37.23 | 0 |
|       | R15076_4_K | NMMAACI | 1065.427 | -0.00201 | 2      | 1        | 40.18 | 0 |
|       | R15076_4_K | NSSYFVF | 1696.833 | 0.00021  | 2      | 1        | 50.35 | 0 |
|       | R15076_4_R | FPGQLN* | 1130.595 | 0.00255  | 2      | 1        | 52.18 | 0 |
|       | R15076_4_R | FPGQLN* | 1130.595 | 0.00119  | 2      | 1        | 51.96 | 0 |
|       | R15076_4_R | FPGQLN* | 1130.595 | 0.00255  | 2      | 1        | 40.76 | 0 |
|       | R15076_4_R | IMNTFSV | 1319.703 | -0.00994 | 2      | 1        | 77.19 | 0 |
|       | R15076_4_R | ISEQFTA | 1245.593 | -0.00279 | 2      | 1        | 34.95 | 0 |
|       | R15076_4_R | SGPFGQI | 2798.343 | 0.00795  | 3      | 1        | 21.04 | 0 |
| \$5-1 | sp P6837C  |         | 13       | 10       | 29.49% | 50135.07 | 4.94  |   |
| \$5-2 | sp Q6P9V   |         | 13       | 10       | 29.49% | 50151.07 | 4.94  |   |
|       | R15076_4_K | DVNAAL* | 1015.578 | -0.00145 | 2      | 1        | 52.62 | 0 |
|       | R15076_4_K | EIIDLVI | 1085.62  | -0.00186 | 2      | 1        | 57.16 | 0 |
|       | R15076_4_K | EIIDLVI | 1085.62  | -0.0014  | 2      | 1        | 49.24 | 0 |
|       | R15076_4_K | FDLMYA* | 887.4331 | 0.00041  | 2      | 1        | 33.18 | 0 |
|       | R15076_4_K | TIGGGDI | 2007.893 | -0.00237 | 3      | 1        | 45.4  | 0 |
|       | R15076_4_K | VGINYQF | 1824.985 | -0.00202 | 2      | 1        | 34.57 | 0 |
|       | R15076_4_R | AVFVDLF | 1701.906 | -0.00035 | 2      | 1        | 89.94 | 0 |
|       | R15076_4_R | FDGALNV | 2409.209 | 0.01578  | 2      | 1        | 34.11 | 0 |
|       | R15076_4_R | LSVDYGF | 781.409  | -0.00094 | 2      | 1        | 46.26 | 0 |
|       | R15076_4_R | NLDIERF | 1718.882 | -0.00402 | 3      | 1        | 33.79 | 0 |
|       | R15076_4_R | NLDIERF | 1718.882 | -0.01074 | 2      | 1        | 62.82 | 0 |
|       | R15076_4_R | QLFHPEG | 1410.774 | -0.00002 | 2      | 1        | 69.92 | 0 |
|       | R15076_4_R | QLFHPEG | 1410.774 | -0.00112 | 3      | 1        | 39.82 | 0 |
| \$6-1 | sp Q4QRB*  |         | 13       | 8        | 20.44% | 50418.13 | 4.82  |   |
|       | R15076_4_K | LAVNM*v | 1159.629 | -0.0028  | 2      | 1        | 27.72 | 0 |
|       | R15076_4_K | LAVNMVF | 1143.634 | -0.00016 | 2      | 1        | 56.59 | 0 |
|       | R15076_4_K | NMM*AAc | 1081.422 | -0.00217 | 2      | 1        | 37.23 | 0 |
|       | R15076_4_K | NMMAACI | 1065.427 | -0.00201 | 2      | 1        | 40.18 | 0 |
|       | R15076_4_K | NSSYFVF | 1696.833 | 0.00021  | 2      | 1        | 50.35 | 0 |
|       | R15076_4_R | AILVDLF | 1631.831 | -0.00182 | 2      | 1        | 36.34 | 0 |
|       | R15076_4_R | FPGQLN* | 1130.595 | 0.00255  | 2      | 1        | 52.18 | 0 |
|       | R15076_4_R | FPGQLN* | 1130.595 | 0.00119  | 2      | 1        | 51.96 | 0 |
|       | R15076_4_R | FPGQLN* | 1130.595 | 0.00255  | 2      | 1        | 40.76 | 0 |
|       | R15076_4_R | IMNTFSV | 1319.703 | -0.00994 | 2      | 1        | 77.19 | 0 |
|       | R15076_4_R | ISEQFTA | 1245.593 | -0.00279 | 2      | 1        | 34.95 | 0 |
|       | R15076_4_R | ISVYYNF | 1397.67  | -0.00319 | 2      | 1        | 64.33 | 0 |
|       | R15076_4_R | ISVYYNF | 1397.67  | 0.00409  | 3      | 1        | 52.12 | 0 |
| \$7-1 | tr Q4KM71  |         | 9        | 7        | 10.01% | 75485.88 | 9.45  |   |
| \$7-2 | tr F1LQW   |         | 9        | 7        | 11.55% | 65695.05 | 8.87  |   |
|       | R15076_4_K | AELDDTF | 1047.478 | 0.0048   | 2      | 1        | 35.84 | 0 |
|       | R15076_4_K | ANLSLLF | 786.4832 | -0.00954 | 2      | 1        | 49.77 | 0 |
|       | R15076_4_K | ISDSEGF | 882.4203 | -0.01239 | 2      | 1        | 27.96 | 0 |

|        |            |         |          |          |        |          |       |   |
|--------|------------|---------|----------|----------|--------|----------|-------|---|
|        | R15076_4_R | AVVIVDI | 886.4993 | -0.01346 | 2      | 1        | 60.36 | 0 |
|        | R15076_4_R | AVVIVDI | 886.4993 | 0.00654  | 2      | 1        | 42.16 | 0 |
|        | R15076_4_R | FATHAA  | 1143.627 | -0.00582 | 2      | 1        | 47.9  | 0 |
|        | R15076_4_R | FATHAA  | 1143.627 | 0.00146  | 3      | 1        | 51.47 | 0 |
|        | R15076_4_R | LFVGNLF | 1807.911 | -0.00147 | 2      | 1        | 70.93 | 0 |
|        | R15076_4_R | MEELHSC | 1389.614 | -0.01177 | 3      | 1        | 20.25 | 0 |
| \$8-1  | sp Q6AY5C  |         | 8        | 6        | 19.60% | 50036.93 | 4.98  |   |
|        | R15076_4_K | FDLMYAF | 887.4331 | 0.00041  | 2      | 1        | 33.18 | 0 |
|        | R15076_4_K | VGINYQF | 1824.985 | -0.00202 | 2      | 1        | 34.57 | 0 |
|        | R15076_4_R | FDGALNV | 2409.209 | 0.01578  | 2      | 1        | 34.11 | 0 |
|        | R15076_4_R | GHYTVGF | 1801.944 | -0.00116 | 3      | 1        | 23.04 | 0 |
|        | R15076_4_R | NLDIERF | 1718.882 | -0.00402 | 3      | 1        | 33.79 | 0 |
|        | R15076_4_R | NLDIERF | 1718.882 | -0.01074 | 2      | 1        | 62.82 | 0 |
|        | R15076_4_R | QLFHPEG | 1410.774 | -0.00002 | 2      | 1        | 69.92 | 0 |
|        | R15076_4_R | QLFHPEG | 1410.774 | -0.00112 | 3      | 1        | 39.82 | 0 |
| \$9-1  | tr MORBS   |         | 6        | 6        | 12.24% | 60984.15 | 5.95  |   |
| \$9-2  | sp Q8K4V4  |         | 6        | 6        | 12.24% | 61014.18 | 5.95  |   |
|        | R15076_4_K | NSTTDQV | 1509.754 | 0.00162  | 2      | 1        | 50.77 | 0 |
|        | R15076_4_K | SESGYGF | 1115.512 | 0.00507  | 2      | 1        | 22.18 | 0 |
|        | R15076_4_R | EFANFTF | 1128.547 | -0.00545 | 2      | 1        | 28.68 | 0 |
|        | R15076_4_R | GLEEYLF | 980.4935 | 0.00074  | 2      | 1        | 28.85 | 0 |
|        | R15076_4_R | GQVSEGC | 1030.528 | -0.00512 | 2      | 1        | 45.83 | 0 |
|        | R15076_4_R | ILEVNGV | 1579.844 | -0.00888 | 2      | 1        | 83.84 | 0 |
| \$10-1 | sp Q5FVM4  |         | 7        | 5        | 11.13% | 54924.67 | 9.01  |   |
|        | R15076_4_K | VELDNMF | 1086.561 | -0.0018  | 2      | 1        | 35.57 | 0 |
|        | R15076_4_R | AVVIVDI | 886.4993 | -0.01346 | 2      | 1        | 60.36 | 0 |
|        | R15076_4_R | AVVIVDI | 886.4993 | 0.00654  | 2      | 1        | 42.16 | 0 |
|        | R15076_4_R | FACHSAS | 1248.615 | 0.00265  | 2      | 1        | 61.83 | 0 |
|        | R15076_4_R | FACHSAS | 1248.615 | -0.0024  | 3      | 1        | 47.07 | 0 |
|        | R15076_4_R | FAQPGSF | 1695.747 | -0.00558 | 2      | 1        | 45.7  | 0 |
|        | R15076_4_R | MEELHNG | 1384.653 | -0.00022 | 2      | 1        | 72.8  | 0 |
| \$11-1 | sp P6263C  |         | 6        | 5        | 14.50% | 50113.26 | 9.1   |   |
| \$11-2 | tr MOR757  |         | 6        | 5        | 14.50% | 50107.29 | 9.1   |   |
|        | R15076_4_K | DGSASG1 | 2994.556 | -0.00899 | 3      | 1        | 58.13 | 0 |
|        | R15076_4_K | QLIVGVN | 870.5407 | -0.00176 | 2      | 1        | 23.05 | 0 |
|        | R15076_4_K | STTTGHI | 1120.6   | -0.00139 | 2      | 1        | 47.36 | 0 |
|        | R15076_4_K | YYVTIII | 1404.727 | 0.01157  | 3      | 1        | 37.9  | 0 |
|        | R15076_4_K | YYVTIII | 1404.727 | -0.00571 | 2      | 1        | 55.64 | 0 |
|        | R15076_4_R | QTVAVGV | 914.567  | -0.00577 | 2      | 1        | 55.82 | 0 |
| \$12-1 | tr G3V90E  |         | 5        | 5        | 9.40%  | 57608.89 | 8.04  |   |
|        | R15076_4_K | FASFIDF | 827.4298 | -0.00295 | 2      | 1        | 35.7  | 0 |
|        | R15076_4_K | LALDIEI | 1277.71  | -0.00278 | 2      | 1        | 61.28 | 0 |
|        | R15076_4_K | LLEGEEC | 1005.467 | -0.00226 | 2      | 1        | 47.66 | 0 |
|        | R15076_4_R | FLEQQNF | 1476.806 | 0.01292  | 2      | 1        | 36.02 | 0 |
|        | R15076_4_R | SLDLDS1 | 1302.715 | -0.00026 | 2      | 1        | 66.76 | 0 |
| \$13-1 | sp P48721  |         | 5        | 5        | 9.87%  | 73856.85 | 5.97  |   |
| \$13-2 | tr F1M95E  |         | 5        | 5        | 9.87%  | 73743.69 | 5.87  |   |
|        | R15076_4_K | STNGDTF | 2055.962 | -0.01092 | 2      | 1        | 53.37 | 0 |
|        | R15076_4_K | VLENAEC | 958.4952 | 0.00216  | 2      | 1        | 53.5  | 0 |
|        | R15076_4_K | VQQTVQI | 1290.68  | 0.00737  | 2      | 1        | 66.55 | 0 |
|        | R15076_4_R | AQFEGIV | 1333.736 | -0.0032  | 2      | 1        | 43.44 | 0 |
|        | R15076_4_R | VINEPTA | 1645.88  | 0.0068   | 2      | 1        | 42.01 | 0 |
| \$14-1 | sp P6301E  |         | 5        | 5        | 9.60%  | 70870.22 | 5.37  |   |
| \$14-2 | tr MORCB1  |         | 5        | 5        | 9.67%  | 70428.7  | 5.43  |   |



|        |                     |          |          |        |          |       |   |
|--------|---------------------|----------|----------|--------|----------|-------|---|
|        | R15076_4_K.DAGTIAC  | 1199.674 | 0.00153  | 2      | 1        | 33.03 | 0 |
|        | R15076_4_K.LLQDFFN  | 1081.568 | -0.00505 | 2      | 1        | 35.99 | 0 |
|        | R15076_4_K.NQVAMNF  | 1649.795 | -0.00289 | 2      | 1        | 36.48 | 0 |
|        | R15076_4_R.FEELNAI  | 1253.616 | -0.00233 | 2      | 1        | 51.37 | 0 |
|        | R15076_4_R.IINEPTA  | 1659.895 | 0.00027  | 2      | 1        | 89.88 | 0 |
| \$15-1 | tr F1M1DC           | 5        | 4        | 7.77%  | 57308.33 | 7.6   |   |
|        | R15076_4_K.FASFIDF  | 827.4298 | -0.00295 | 2      | 1        | 35.7  | 0 |
|        | R15076_4_K.NKYEDEI  | 1308.654 | -0.00124 | 3      | 1        | 45.87 | 0 |
|        | R15076_4_K.NKYEDEI  | 1308.654 | 0.00148  | 2      | 1        | 51.42 | 0 |
|        | R15076_4_R.FLEQQNF  | 1476.806 | 0.01292  | 2      | 1        | 36.02 | 0 |
|        | R15076_4_R.SLDLDSI  | 1302.715 | -0.00026 | 2      | 1        | 66.76 | 0 |
| \$16-1 | tr MOR3X€           | 5        | 4        | 18.05% | 30610.76 | 6.97  |   |
| \$16-2 | sp P47727           | 5        | 4        | 18.05% | 30577.76 | 8.21  |   |
|        | R15076_4_K.ILLNACC  | 1458.734 | 0.00171  | 2      | 1        | 63.26 | 0 |
|        | R15076_4_K.QLQTEGI  | 1128.601 | -0.00251 | 2      | 1        | 53.23 | 0 |
|        | R15076_4_R.FHQLDII  | 1582.797 | 0.00178  | 3      | 1        | 36.49 | 0 |
|        | R15076_4_R.FHQLDII  | 1582.797 | 0.0045   | 2      | 1        | 27.51 | 0 |
|        | R15076_4_R.SETITEF  | 1692.836 | -0.00173 | 2      | 1        | 80.72 | 0 |
| \$17-1 | sp P1520€           | 4        | 4        | 2.68%  | 269496.5 | 4.74  |   |
| \$17-2 | tr F1LRL€           | 4        | 4        | 2.68%  | 269639.6 | 4.74  |   |
|        | R15076_4_K.NLISPDI  | 2081.164 | -0.00862 | 2      | 1        | 66.38 | 0 |
|        | R15076_4_K.TTEAAA1  | 2256.183 | 0.00755  | 3      | 1        | 24.96 | 0 |
|        | R15076_4_R.AVLDALI  | 1028.599 | 0.00589  | 2      | 1        | 38.75 | 0 |
|        | R15076_4_R.HNLQDFI  | 1241.664 | 0.01095  | 2      | 1        | 38.44 | 0 |
| \$18-1 | sp P9757€           | 4        | 3        | 17.05% | 24296.74 | 8.57  |   |
|        | R15076_4_K.FDPYEHE  | 2015.95  | -0.00779 | 3      | 1        | 23.62 | 0 |
|        | R15076_4_K.FDPYEHE  | 2015.95  | 0.01159  | 4      | 1        | 36.59 | 0 |
|        | R15076_4_R.ALADTEM  | 1002.521 | -0.0113  | 2      | 1        | 63.69 | 0 |
|        | R15076_4_R.TLRPALV  | 1152.746 | -0.00642 | 2      | 1        | 61.41 | 0 |
| \$19-1 | sp P0194€           | 3        | 3        | 32.39% | 15328.35 | 7.81  |   |
| \$19-2 | tr B1H21€           | 3        | 3        | 32.39% | 15328.35 | 7.81  |   |
|        | R15076_4_K.AADHVEI  | 2297.152 | -0.00341 | 3      | 1        | 46.84 | 0 |
|        | R15076_4_K.IGGHGGF  | 1572.74  | 0.00737  | 2      | 1        | 48.75 | 0 |
|        | R15076_4_R.MFAAFP1  | 1013.512 | -0.00026 | 2      | 1        | 46.76 | 0 |
| \$20-1 | sp P11517           | 3        | 3        | 21.77% | 15982.24 | 8.91  |   |
|        | R15076_4_K.LHVDPEM  | 1126.564 | -0.00875 | 2      | 1        | 35.99 | 0 |
|        | R15076_4_K.VINAFNI  | 1090.589 | -0.0036  | 2      | 1        | 56.01 | 0 |
|        | R15076_4_K.VNADNVC  | 1285.649 | -0.00324 | 2      | 1        | 89.58 | 0 |
| \$21-1 | sp Q6371€           | 3        | 3        | 12.06% | 22109.14 | 8.27  |   |
|        | R15076_4_K.DISLSDY  | 940.4622 | -0.00122 | 2      | 1        | 37.68 | 0 |
|        | R15076_4_K.IGHPAPS  | 953.5203 | 0.00487  | 3      | 1        | 20.71 | 0 |
|        | R15076_4_R.SVDEILF  | 831.457  | -0.0013  | 2      | 1        | 29.12 | 0 |
| \$22-1 | sp Q9JJ54           | 3        | 3        | 8.22%  | 38217.52 | 7.61  |   |
|        | R15076_4_K.IFVGGLS  | 1488.758 | -0.00469 | 2      | 1        | 46.75 | 0 |
|        | R15076_4_K.LDPITGF  | 771.4359 | 0.0032   | 2      | 1        | 29.41 | 0 |
|        | R15076_4_R.GFGFVLV  | 914.5135 | 0.00075  | 2      | 1        | 28.66 | 0 |
| \$23-1 | tr V9GZ8€           | 3        | 3        | 8.82%  | 41619.23 | 5.46  |   |
| \$23-2 | tr D3ZRNE           | 3        | 3        | 8.78%  | 41962.62 | 5.3   |   |
| \$23-3 | sp P60711           | 3        | 3        | 8.80%  | 41736.29 | 5.29  |   |
| \$23-4 | sp P6325€           | 3        | 3        | 8.80%  | 41792.4  | 5.31  |   |
|        | R15076_4_K.CDVIDIR  | 777.356  | 0.00325  | 2      | 1        | 30.17 | 0 |
|        | R15076_4_K.SYELPDC  | 1790.892 | -0.00082 | 2      | 1        | 68.83 | 0 |
|        | R15076_4_R.HQGV MVC | 1171.571 | -0.00207 | 2      | 1        | 51.58 | 0 |
| \$24-1 | tr D3ZH9€           | 3        | 2        | 6.10%  | 68856.3  | 5.54  |   |

|        |                    |          |          |        |          |       |   |
|--------|--------------------|----------|----------|--------|----------|-------|---|
|        | R15076_4_K.NINADEF | 2261.141 | -0.01195 | 2      | 1        | 23.47 | 0 |
|        | R15076_4_K.NINADEF | 2261.141 | -0.01467 | 3      | 1        | 30.72 | 0 |
|        | R15076_4_K.NQVAMNF | 1649.795 | -0.00289 | 2      | 1        | 36.48 | 0 |
| \$25-1 | tr D3ZN9E          | 2        | 2        | 1.03%  | 209150.3 | 6.57  |   |
|        | R15076_4_R.ESHTAVV | 1263.622 | -0.01118 | 2      | 1        | 46.39 | 0 |
|        | R15076_4_R.GPFSEIS | 1082.552 | 0.00036  | 2      | 1        | 51.09 | 0 |
| \$26-1 | tr D3ZPW4          | 2        | 2        | 1.80%  | 125018.8 | 8.98  |   |
|        | R15076_4_K.LGGIGVF | 1654.916 | -0.01644 | 2      | 1        | 22.4  | 0 |
|        | R15076_4_R.VIDLRF  | 615.3824 | -0.00038 | 2      | 1        | 28.55 | 0 |
| \$27-1 | tr MOR584          | 2        | 2        | 10.41% | 29118.74 | 6.6   |   |
| \$27-2 | tr F7FEZE          | 2        | 2        | 8.75%  | 34222.82 | 9.27  |   |
| \$27-3 | tr Q6P6GE          | 2        | 2        | 8.95%  | 33619.24 | 9.27  |   |
| \$27-4 | tr Q5IOM7          | 2        | 2        | 8.75%  | 34195.8  | 9.27  |   |
| \$27-5 | sp P0425E          | 2        | 2        | 8.75%  | 34211.86 | 9.2   |   |
|        | R15076_4_R.EDSQRPC | 1437.744 | -0.00826 | 2      | 1        | 41.49 | 0 |
|        | R15076_4_R.GFAFVTF | 1699.76  | 0.00716  | 2      | 1        | 38.96 | 0 |
| \$28-1 | sp P0076E          | 2        | 2        | 10.57% | 25959.22 | 4.71  |   |
|        | R15076_4_K.SRIQVRI | 2950.549 | 0.05113  | 4      | 1        | 36.7  | 0 |
|        | R15076_4_R.LGEHNIN | 2211.104 | -0.00424 | 2      | 1        | 88.19 | 0 |
| \$29-1 | sp P0490E          | 2        | 2        | 11.47% | 25913.66 | 8.27  |   |
| \$29-2 | tr B6DYQ1          | 2        | 2        | 11.47% | 25968.78 | 8.78  |   |
| \$29-3 | tr Q6LDPF          | 2        | 2        | 11.57% | 25685.34 | 8.27  |   |
| \$29-4 | tr G3V98E          | 2        | 2        | 11.47% | 25894.61 | 7.67  |   |
|        | R15076_4_K.CLDAFPM | 1077.54  | 0.00059  | 2      | 1        | 28.08 | 0 |
|        | R15076_4_K.LGLDFPM | 1789.948 | 0.00066  | 2      | 1        | 56.62 | 0 |
| \$30-1 | sp P06761          | 2        | 2        | 2.60%  | 72346.1  | 5.07  |   |
|        | R15076_4_R.IINEPTA | 1659.895 | 0.00027  | 2      | 1        | 89.88 | 0 |
|        | R15076_4_R.IINEPTA | 1815.996 | 0.00355  | 2      | 1        | 52.74 | 0 |
| \$31-1 | sp P35704          | 2        | 2        | 9.09%  | 21783.41 | 5.34  |   |
|        | R15076_4_K.SLSQNYC | 1108.6   | -0.00228 | 2      | 1        | 48.53 | 0 |
|        | R15076_4_R.GLFIIDA | 876.5189 | 0.00619  | 2      | 1        | 40.59 | 0 |
| \$32-1 | tr Q0QEU1          | 2        | 2        | 15.13% | 25535.14 | 8.84  |   |
| \$32-2 | sp P04797          | 2        | 2        | 10.81% | 35827.59 | 8.14  |   |
| \$32-3 | tr D3ZGY4          | 2        | 2        | 10.81% | 35822.57 | 7.63  |   |
| \$32-4 | tr MOR59C          | 2        | 2        | 10.81% | 35813.56 | 8.14  |   |
|        | R15076_4_K.WGDAGAF | 2277.038 | -0.01472 | 2      | 1        | 68.15 | 0 |
|        | R15076_4_R.GAAQNI1 | 1369.743 | -0.00407 | 2      | 1        | 45.3  | 0 |
| \$33-1 | tr Q6471E          | 2        | 2        | 1.21%  | 198564.1 | 4.76  |   |
| \$33-2 | tr F1MAQE          | 2        | 2        | 1.20%  | 198902.4 | 4.75  |   |
| \$33-3 | tr F1LNKC          | 2        | 2        | 1.18%  | 202242.2 | 4.79  |   |
| \$33-4 | sp P1514E          | 2        | 2        | 1.18%  | 202408.3 | 4.77  |   |
|        | R15076_4_R.LINQPLF | 1150.683 | -0.00075 | 2      | 1        | 44.25 | 0 |
|        | R15076_4_R.SILTEQ1 | 1371.773 | 0.00022  | 2      | 1        | 32.3  | 0 |
| \$34-1 | tr Q6AYI1          | 2        | 2        | 3.74%  | 69238.36 | 9.06  |   |
| \$34-2 | tr B6DTPF          | 2        | 2        | 3.75%  | 69111.22 | 9.01  |   |
|        | R15076_4_R.ELAQQVC | 1792.865 | 0.01191  | 2      | 1        | 48.03 | 0 |
|        | R15076_4_R.QLAEDFI | 963.5146 | 0.00183  | 2      | 1        | 50.84 | 0 |
| \$35-1 | sp Q9JLTC          | 2        | 2        | 1.11%  | 228962.5 | 5.49  |   |
| \$35-2 | tr G3V9Y1          | 2        | 2        | 1.11%  | 228995.5 | 5.44  |   |
|        | R15076_4_K.KQELEE1 | 1738.897 | 0.00431  | 3      | 1        | 30.75 | 0 |
|        | R15076_4_R.DRAEAEA | 917.4435 | 0.00055  | 2      | 1        | 21.32 | 0 |
| \$36-1 | tr D4A8XE          | 10       | 1        | 0.94%  | 70075.66 | 7.19  |   |
|        | R15076_4_R.DFETLK. | 752.3825 | -0.00111 | 2      | 1        | 30.66 | 0 |
|        | R15076_4_R.DFETLK. | 752.3825 | 0.00049  | 2      | 1        | 35.17 | 0 |

|        |                    |          |          |        |          |       |   |
|--------|--------------------|----------|----------|--------|----------|-------|---|
|        | R15076_4_R.DFETLK. | 752.3825 | -0.00123 | 2      | 1        | 32.69 | 0 |
|        | R15076_4_R.DFETLK. | 752.3825 | -0.01023 | 2      | 1        | 34.84 | 0 |
|        | R15076_4_R.DFETLK. | 752.3825 | -0.00103 | 2      | 1        | 37.27 | 0 |
|        | R15076_4_R.DFETLK. | 752.3825 | -0.01023 | 2      | 1        | 38.1  | 0 |
|        | R15076_4_R.DFETLK. | 752.3825 | -0.01023 | 2      | 1        | 37.21 | 0 |
|        | R15076_4_R.DFETLK. | 752.3825 | -0.01023 | 2      | 1        | 32.85 | 0 |
|        | R15076_4_R.DFETLK. | 752.3825 | 0.00977  | 2      | 1        | 37.28 | 0 |
|        | R15076_4_R.DFETLK. | 752.3825 | 0.00977  | 2      | 1        | 24.72 | 0 |
| \$37-1 | tr D4A4U€          | 3        | 1        | 2.14%  | 47465.31 | 5.91  |   |
|        | R15076_4_K.ELALKNF | 1026.594 | 0.00575  | 2      | 1        | 22.9  | 0 |
|        | R15076_4_K.ELALKNF | 1026.594 | 0.00145  | 2      | 1        | 20.54 | 0 |
|        | R15076_4_K.ELALKNF | 1026.594 | 0.00145  | 2      | 1        | 23.61 | 0 |
| \$38-1 | tr MORA91          | 3        | 1        | 10.67% | 8182.27  | 8     |   |
|        | R15076_4_K.LVKENNI | 985.5789 | 0.00615  | 2      | 1        | 22.33 | 0 |
|        | R15076_4_K.LVKENNI | 985.5789 | 0.00615  | 2      | 1        | 20.16 | 0 |
|        | R15076_4_K.LVKENNI | 985.5789 | 0.00615  | 2      | 1        | 22.11 | 0 |
| \$39-1 | tr Q4KLMC          | 3        | 1        | 1.55%  | 43348.13 | 9.7   |   |
|        | R15076_4_K.IPPFEK. | 730.4134 | -0.00468 | 2      | 1        | 23.26 | 0 |
|        | R15076_4_K.IPPFEK. | 730.4134 | -0.00414 | 2      | 1        | 20.01 | 0 |
|        | R15076_4_K.IPPFEK. | 730.4134 | -0.00428 | 2      | 1        | 20.11 | 0 |
| \$40-1 | tr D3ZB9€          | 2        | 1        | 0.50%  | 136011.2 | 5.48  |   |
|        | R15076_4_R.LNENLK. | 730.4094 | -0.00886 | 2      | 1        | 22.11 | 0 |
|        | R15076_4_R.LNENLK. | 730.4094 | -0.00834 | 2      | 1        | 20.97 | 0 |
| \$41-1 | tr D4A7T€          | 2        | 1        | 1.60%  | 92801.57 | 5.31  |   |
|        | R15076_4_K.SNSDLQV | 1532.766 | -0.01915 | 3      | 1        | 27    | 0 |
|        | R15076_4_K.SNSDLQV | 1532.766 | -0.01915 | 3      | 1        | 24.62 | 0 |
| \$42-1 | sp Q8VIP€          | 2        | 1        | 1.50%  | 94920.14 | 8.35  |   |
| \$42-2 | tr C7C5T1          | 2        | 1        | 1.50%  | 95064.31 | 8.35  |   |
|        | R15076_4_R.ALADLSV | 1395.795 | 0.01725  | 4      | 1        | 21.85 | 0 |
|        | R15076_4_R.ALADLSV | 1395.795 | 0.01725  | 4      | 1        | 22.58 | 0 |
| \$43-1 | tr A0JN1€          | 1        | 1        | 8.09%  | 19791.9  | 5.78  |   |
|        | R15076_4_R.TVLDSG1 | 1533.787 | -0.01872 | 3      | 1        | 22.12 | 0 |
| \$44-1 | tr A1A5RC          | 1        | 1        | 1.60%  | 58217.5  | 8.89  |   |
| \$44-2 | tr F1LPJ€          | 1        | 1        | 1.60%  | 58086.31 | 8.89  |   |
|        | R15076_4_R.NLTAIGY | 879.4934 | 0.0007   | 2      | 1        | 23.56 | 0 |
| \$45-1 | tr A1L1J7          | 1        | 1        | 2.08%  | 37569.31 | 4.94  |   |
|        | R15076_4_K.GDFETIF | 809.404  | -0.00876 | 2      | 1        | 24.49 | 0 |
| \$46-1 | tr A5I9FC          | 1        | 1        | 0.49%  | 162181.4 | 5.69  |   |
| \$46-2 | tr Q9WUL€          | 1        | 1        | 1.39%  | 56157.97 | 5.69  |   |
| \$46-3 | tr F1LPL4          | 1        | 1        | 0.66%  | 119467.7 | 5.84  |   |
|        | R15076_4_K.IAEIQA€ | 800.4625 | -0.01028 | 2      | 1        | 22.42 | 0 |
| \$47-1 | tr BOBN7€          | 1        | 1        | 1.89%  | 46939.17 | 8.85  |   |
|        | R15076_4_K.LLKEQEF | 1044.568 | -0.01887 | 2      | 1        | 24.2  | 0 |
| \$48-1 | sp BOBNK€          | 1        | 1        | 2.04%  | 44552.44 | 5.21  |   |
|        | R15076_4_K.LLGSSH€ | 897.5265 | 0.01373  | 2      | 1        | 28.38 | 0 |
| \$49-1 | tr BOBNM€          | 1        | 1        | 3.30%  | 24169.27 | 5.65  |   |
|        | R15076_4_K.IQM*KME | 923.4689 | -0.00387 | 2      | 1        | 27.48 | 0 |
| \$50-1 | sp B1WBTC          | 1        | 1        | 0.97%  | 71913.06 | 6.35  |   |
| \$50-2 | sp Q5U2W€          | 1        | 1        | 1.44%  | 46848.01 | 10.8  |   |
|        | R15076_4_K.DM*ETL€ | 752.3495 | -0.00325 | 2      | 1        | 30.49 | 0 |
| \$51-1 | tr B1WBX7          | 1        | 1        | 5.42%  | 18663.96 | 4.88  |   |
| \$51-2 | tr G3V8Q1          | 1        | 1        | 5.45%  | 18507.77 | 4.78  |   |
|        | R15076_4_R.DSIVLEI | 1059.568 | 0.01533  | 2      | 1        | 20.15 | 0 |
| \$52-1 | tr B2GUW€          | 1        | 1        | 1.27%  | 79868.7  | 6.86  |   |

|         |                      |          |          |        |          |       |   |
|---------|----------------------|----------|----------|--------|----------|-------|---|
|         | R15076_4 K. SLPLISA  | 943.5571 | 0.00436  | 2      | 1        | 31.7  | 0 |
| \$53-1  | tr B6DYQ7            | 1        | 1        | 5.24%  | 23438.61 | 6.89  |   |
| \$53-2  | tr D4A8S2            | 1        | 1        | 6.32%  | 20065.23 | 7     |   |
| \$53-3  | sp P04906            | 1        | 1        | 5.24%  | 23438.61 | 6.89  |   |
|         | R15076_4 R. MLLADQC  | 1276.635 | -0.00153 | 2      | 1        | 26.13 | 0 |
| \$54-1  | tr COLPO3            | 1        | 1        | 0.70%  | 98052.06 | 6.79  |   |
| \$54-2  | tr G3V6F8            | 1        | 1        | 0.69%  | 99623.93 | 6.99  |   |
|         | R15076_4 R. LFETLK.  | 750.4396 | -0.00064 | 2      | 1        | 31.13 | 0 |
| \$55-1  | tr C9WPN6            | 1        | 1        | 11.29% | 13636.84 | 9.92  |   |
| \$55-2  | tr W8CEN7            | 1        | 1        | 2.97%  | 51153.05 | 8.76  |   |
| \$55-3  | sp P81795            | 1        | 1        | 2.97%  | 51078.88 | 8.66  |   |
|         | R15076_4 K. IVLTNPV  | 1558.815 | 0.0018   | 2      | 1        | 29.31 | 0 |
| \$56-1  | tr D3Z8BC            | 1        | 1        | 6.60%  | 12252.19 | 9.82  |   |
|         | R15076_4 M. VAPAVLF  | 725.4668 | 0.00014  | 2      | 1        | 22.57 | 0 |
| \$57-1  | tr D3Z954            | 1        | 1        | 1.34%  | 59219.92 | 6.81  |   |
|         | R15076_4 K. RM*FLLA  | 922.5291 | -0.00363 | 2      | 1        | 21.97 | 0 |
| \$58-1  | tr D3ZE49            | 1        | 1        | 0.75%  | 87545.83 | 4.66  |   |
| \$58-2  | tr MOR78C            | 1        | 1        | 1.03%  | 63199.99 | 4.49  |   |
|         | R15076_4 K. DSLVPR.  | 686.3832 | -0.0002  | 2      | 1        | 31.82 | 0 |
| \$59-1  | tr D3ZFN9            | 1        | 1        | 0.53%  | 150044   | 6.08  |   |
|         | R15076_4 K. LQLEKRF  | 942.5843 | 0.01156  | 2      | 1        | 22.98 | 0 |
| \$60-1  | tr D3ZFQ7            | 1        | 1        | 3.97%  | 28377.65 | 9.68  |   |
|         | R15076_4 R. QPLNSIG  | 1182.695 | 0.00925  | 2      | 1        | 30.88 | 0 |
| \$61-1  | tr D3ZG47            | 1        | 1        | 0.91%  | 87759.15 | 8.69  |   |
| \$61-2  | tr D4A2P1            | 1        | 1        | 0.61%  | 132151.8 | 5.74  |   |
|         | R15076_4 K. LQGERKf  | 858.5156 | 0.00282  | 2      | 1        | 20.39 | 0 |
| \$62-1  | tr D3ZH11            | 1        | 1        | 0.39%  | 145991.7 | 6.58  |   |
| \$62-2  | tr D3ZH16            | 1        | 1        | 0.39%  | 145260.3 | 8.8   |   |
| \$62-3  | tr F1M841            | 1        | 1        | 0.75%  | 75456.28 | 8.92  |   |
| \$62-4  | tr Q4V8M7            | 1        | 1        | 0.64%  | 88403.05 | 5.74  |   |
| \$62-5  | tr B2GV26            | 1        | 1        | 0.42%  | 135814.5 | 6.22  |   |
| \$62-6  | tr D3ZFT5            | 1        | 1        | 0.63%  | 90730.64 | 8.49  |   |
| \$62-7  | tr Q5Y9B8            | 1        | 1        | 0.39%  | 146103   | 6.2   |   |
| \$62-8  | tr F1M6I1            | 1        | 1        | 0.70%  | 79322.34 | 7.53  |   |
| \$62-9  | tr AOA096            | 1        | 1        | 0.70%  | 81716.7  | 5.72  |   |
| \$62-10 | tr D3ZRJE            | 1        | 1        | 0.40%  | 142783.6 | 8.84  |   |
| \$62-11 | tr E9PTA9            | 1        | 1        | 0.62%  | 91364.7  | 5.87  |   |
| \$62-12 | tr F1LR97            | 1        | 1        | 0.64%  | 88299.94 | 5.82  |   |
| \$62-13 | tr Q5Y9B7            | 1        | 1        | 0.62%  | 91377.74 | 5.92  |   |
| \$62-14 | tr G3V905            | 1        | 1        | 0.39%  | 146090   | 6.16  |   |
| \$62-15 | tr D3Z8HE            | 1        | 1        | 0.39%  | 146956.3 | 6.12  |   |
| \$62-16 | tr AOA0AC            | 1        | 1        | 0.97%  | 57687.6  | 5.32  |   |
| \$62-17 | sp Q6MG97            | 1        | 1        | 1.10%  | 50766.7  | 4.97  |   |
|         | R15076_4 R. CLFGK. I | 624.3174 | -0.00137 | 2      | 1        | 22.3  | 0 |
| \$63-1  | tr D3ZH42            | 1        | 1        | 0.48%  | 138350.5 | 6.34  |   |
|         | R15076_4 K. VSNGLK.  | 617.3617 | -0.01103 | 2      | 1        | 24.28 | 0 |
| \$64-1  | tr D3ZHF9            | 1        | 1        | 0.42%  | 189941.8 | 6.55  |   |
| \$64-2  | tr AOA096            | 1        | 1        | 0.53%  | 150928.7 | 7.3   |   |
|         | R15076_4 K. LSPQGKF  | 785.4628 | 0.01007  | 2      | 1        | 33.09 | 0 |
| \$65-1  | tr D3ZI44            | 1        | 1        | 3.70%  | 26668.24 | 10.9  |   |
|         | R15076_4 R. EASTLRA  | 1004.537 | -0.01566 | 2      | 1        | 24.53 | 0 |
| \$66-1  | tr D3ZNQ2            | 1        | 1        | 2.63%  | 37094.97 | 4.92  |   |
|         | R15076_4 K. GLPELM*  | 1090.575 | -0.01073 | 3      | 1        | 20.63 | 0 |
| \$67-1  | tr D3ZPP5            | 1        | 1        | 1.81%  | 59606.57 | 7.45  |   |

|        |                      |          |          |       |          |       |   |
|--------|----------------------|----------|----------|-------|----------|-------|---|
|        | R15076_4 R. VVVGEPF  | 1024.567 | 0.01189  | 3     | 1        | 21.8  | 0 |
| \$68-1 | tr D3ZRE             | 1        | 1        | 5.75% | 41932.8  | 9.62  |   |
| \$68-2 | tr A0JPL             | 1        | 1        | 6.23% | 38914.42 | 9.59  |   |
|        | R15076_4 K. AAQQAAS  | 2001.958 | 0.00298  | 3     | 1        | 21.33 | 0 |
| \$69-1 | tr D3ZXS             | 1        | 1        | 2.10% | 38715.16 | 5.63  |   |
|        | R15076_4 K. HHEDVKF  | 920.4697 | -0.01445 | 2     | 1        | 20.31 | 0 |
| \$70-1 | tr D3ZYM             | 1        | 1        | 0.89% | 85767.15 | 7.24  |   |
|        | R15076_4 K. VANQLD   | 787.4308 | -0.00189 | 2     | 1        | 22.31 | 0 |
| \$71-1 | tr D4A0G             | 1        | 1        | 0.57% | 138172.6 | 5     |   |
|        | R15076_4 K. ENVVVYF  | 878.473  | -0.00155 | 2     | 1        | 24.23 | 0 |
| \$72-1 | tr D4A1X             | 1        | 1        | 0.68% | 100717.4 | 7.83  |   |
| \$72-2 | tr D4A2C             | 1        | 1        | 0.70% | 97914.28 | 7.84  |   |
| \$72-3 | tr MOR8N             | 1        | 1        | 0.85% | 80720.22 | 5.86  |   |
|        | R15076_4 R. EMPLLK.  | 730.4168 | -0.00026 | 2     | 1        | 20.11 | 0 |
| \$73-1 | tr D4A3X1            | 1        | 1        | 1.25% | 42680.93 | 4.86  |   |
|        | R15076_4 R. CAHPR. C | 640.2984 | 0.00566  | 2     | 1        | 32.21 | 0 |
| \$74-1 | tr D4A5W             | 1        | 1        | 0.58% | 134674   | 8.86  |   |
|        | R15076_4 R. LATVRAF  | 786.4944 | 0.0017   | 2     | 1        | 21.05 | 0 |
| \$75-1 | tr D4A6C             | 1        | 1        | 1.59% | 54600.42 | 5.31  |   |
|        | R15076_4 R. VTNFVAG  | 934.5105 | -0.00151 | 2     | 1        | 21.25 | 0 |
| \$76-1 | tr D4A7X             | 1        | 1        | 1.00% | 125317.3 | 9.25  |   |
|        | R15076_4 K. CVYVIGF  | 1350.756 | 0.00348  | 2     | 1        | 22.22 | 0 |
| \$77-1 | tr D4A961            | 1        | 1        | 2.61% | 33548.44 | 9.12  |   |
|        | R15076_4 R. GASAMLI  | 818.4553 | 0.00253  | 2     | 1        | 33.39 | 0 |
| \$78-1 | tr D4A9Q             | 1        | 1        | 2.26% | 50319.91 | 8.05  |   |
|        | R15076_4 K. EHRVGIF  | 1211.653 | -0.01233 | 3     | 1        | 25.46 | 0 |
| \$79-1 | tr D4AA1C            | 1        | 1        | 0.92% | 73235.73 | 9.15  |   |
| \$79-2 | sp A2VD1             | 1        | 1        | 0.87% | 77120.26 | 9.08  |   |
|        | R15076_4 R. LQPDIK.  | 713.4192 | -0.00046 | 2     | 1        | 23.26 | 0 |
| \$80-1 | tr D4AAW             | 1        | 1        | 1.04% | 78321.42 | 8.05  |   |
| \$80-2 | tr F1LZH7            | 1        | 1        | 0.49% | 166665.5 | 8.71  |   |
|        | R15076_4 K. YQDFLS   | 900.4462 | -0.01118 | 2     | 1        | 30.14 | 0 |
| \$81-1 | tr D4ADE4            | 1        | 1        | 0.52% | 108886.9 | 4.92  |   |
| \$81-2 | sp Q9JKB             | 1        | 1        | 0.41% | 137078.7 | 5.35  |   |
| \$81-3 | tr F1LYA4            | 1        | 1        | 0.41% | 136732.2 | 5.35  |   |
|        | R15076_4 K. FM*EDR.  | 713.2923 | -0.00047 | 2     | 1        | 20.04 | 0 |
| \$82-1 | tr D4ADZ             | 1        | 1        | 1.97% | 74639.86 | 5.76  |   |
|        | R15076_4 K. SLFPGLF  | 1506.78  | 0.00438  | 3     | 1        | 24.42 | 0 |
| \$83-1 | tr E9PSL7            | 1        | 1        | 0.34% | 235307.8 | 6.16  |   |
| \$83-2 | tr Q9QX1             | 1        | 1        | 0.43% | 185923.9 | 6.22  |   |
|        | R15076_4 K. VLDNQIF  | 829.4778 | -0.01494 | 2     | 1        | 32.61 | 0 |
| \$84-1 | tr F1LNSC            | 1        | 1        | 0.42% | 184326.9 | 5     |   |
| \$84-2 | sp POC6CC            | 1        | 1        | 0.42% | 184449.1 | 4.98  |   |
|        | R15076_4 R. IIETTS   | 791.4509 | -0.00183 | 2     | 1        | 20.43 | 0 |
| \$85-1 | tr F1LNS7            | 1        | 1        | 0.34% | 332820.1 | 5.74  |   |
|        | R15076_4 K. DSSGGGI  | 980.3916 | 0.01884  | 2     | 1        | 32.76 | 0 |
| \$86-1 | tr F1LQGC            | 1        | 1        | 1.75% | 70226.5  | 4.71  |   |
| \$86-2 | sp P5425             | 1        | 1        | 1.75% | 70212.47 | 4.71  |   |
|        | R15076_4 K. EITQLQ   | 1273.7   | -0.01294 | 2     | 1        | 23.48 | 0 |
| \$87-1 | tr F1LSL1            | 1        | 1        | 1.89% | 33541.67 | 5.26  |   |
| \$87-2 | tr F1LUA1            | 1        | 1        | 0.43% | 161104.1 | 5.6   |   |
| \$87-3 | sp Q68A21            | 1        | 1        | 1.90% | 33417.53 | 5.35  |   |
|        | R15076_4 R. LDIQNK.  | 730.4094 | -0.00336 | 2     | 1        | 20.31 | 0 |
| \$88-1 | tr F1LT3             | 1        | 1        | 8.33% | 17733.89 | 10.46 |   |

|         |                      |          |          |        |          |       |       |   |
|---------|----------------------|----------|----------|--------|----------|-------|-------|---|
| \$88-2  | tr B5DES1            | 1        | 1        | 8.33%  | 17694.83 | 10.44 |       |   |
| \$88-3  | tr D3ZTH8            | 1        | 1        | 8.33%  | 17752.87 | 10.38 |       |   |
| \$88-4  | sp P62752            | 1        | 1        | 8.33%  | 17694.83 | 10.44 |       |   |
|         | R15076_4 R. LAPDYDA  | 1404.701 | -0.01221 |        | 2        | 1     | 66.63 | 0 |
| \$89-1  | tr F1LTJ8            | 1        | 1        | 0.81%  | 99025.55 | 6.62  |       |   |
| \$89-2  | tr D3ZJ92            | 1        | 1        | 0.73%  | 108472.4 | 7.18  |       |   |
|         | R15076_4 K. EQAKQLF  | 872.4948 | 0.01089  |        | 2        | 1     | 27.56 | 0 |
| \$90-1  | tr F1LV18            | 1        | 1        | 1.45%  | 73721.45 | 8.9   |       |   |
| \$90-2  | tr F1M3D8            | 1        | 1        | 1.37%  | 77629.01 | 8.8   |       |   |
| \$90-3  | sp Q62828            | 1        | 1        | 1.45%  | 73781.5  | 8.9   |       |   |
|         | R15076_4 R. INEILSM  | 1114.647 | -0.00612 |        | 2        | 1     | 30.84 | 0 |
| \$91-1  | tr F1LWF8            | 1        | 1        | 1.04%  | 157331.6 | 5.9   |       |   |
| \$91-2  | sp P97608            | 1        | 1        | 1.09%  | 150636.2 | 5.87  |       |   |
| \$91-3  | tr F1M4H1            | 1        | 1        | 1.08%  | 151588.3 | 5.78  |       |   |
|         | R15076_4 K. M*PNDQA  | 1474.707 | 0.00124  |        | 3        | 1     | 21.5  | 0 |
| \$92-1  | tr F1LXQ8            | 1        | 1        | 1.90%  | 88545.65 | 5.04  |       |   |
| \$92-2  | tr F1M784            | 1        | 1        | 1.85%  | 91088.45 | 5.08  |       |   |
| \$92-3  | tr B5DFG8            | 1        | 1        | 1.85%  | 91060.43 | 5.08  |       |   |
|         | R15076_4 R. KFLEGN8  | 1722.921 | -0.00074 |        | 2        | 1     | 23.48 | 0 |
| \$93-1  | tr F1M1J8            | 1        | 1        | 5.93%  | 13639.68 | 9.04  |       |   |
| \$93-2  | sp P60522            | 1        | 1        | 5.98%  | 13666.68 | 7.81  |       |   |
| \$93-3  | sp Q0VGKC            | 1        | 1        | 5.98%  | 14043.88 | 8.67  |       |   |
| \$93-4  | sp P60517            | 1        | 1        | 5.98%  | 13917.86 | 8.73  |       |   |
|         | R15076_4 R. VPVIVEK  | 783.4975 | -0.00114 |        | 2        | 1     | 35.73 | 0 |
| \$94-1  | tr F1M6F8            | 1        | 1        | 0.87%  | 102757.5 | 6.25  |       |   |
| \$94-2  | tr F1LZT8            | 1        | 1        | 0.86%  | 103156.9 | 6.38  |       |   |
| \$94-3  | tr F1M7E8            | 1        | 1        | 0.83%  | 107481.7 | 6.55  |       |   |
|         | R15076_4 K. EIISEV6  | 973.5313 | -0.00274 |        | 2        | 1     | 36.69 | 0 |
| \$95-1  | tr F1M832            | 1        | 1        | 0.86%  | 59852.78 | 7.73  |       |   |
| \$95-2  | tr F1LMZ8            | 1        | 1        | 1.19%  | 45178.57 | 8.99  |       |   |
| \$95-3  | tr F1LP97            | 1        | 1        | 1.04%  | 51304.51 | 8.53  |       |   |
| \$95-4  | tr Q63388            | 1        | 1        | 4.07%  | 13821.7  | 8.06  |       |   |
|         | R15076_4 R. FALEK. S | 607.345  | -0.00242 |        | 2        | 1     | 26.27 | 0 |
| \$96-1  | tr F1M8N8            | 1        | 1        | 0.30%  | 189643.1 | 6.06  |       |   |
| \$96-2  | tr Q80XZ1            | 1        | 1        | 0.85%  | 63721.12 | 8.89  |       |   |
| \$96-3  | tr MOR427            | 1        | 1        | 1.16%  | 48729.43 | 8.42  |       |   |
| \$96-4  | sp P13437            | 1        | 1        | 1.26%  | 41870.45 | 8.09  |       |   |
| \$96-5  | tr Q68FT8            | 1        | 1        | 1.02%  | 54892.33 | 5.74  |       |   |
| \$96-6  | tr MOR3W8            | 1        | 1        | 1.62%  | 35253.13 | 8.46  |       |   |
| \$96-7  | tr BOBMY8            | 1        | 1        | 3.11%  | 17933.26 | 7.78  |       |   |
| \$96-8  | tr F1LZSC            | 1        | 1        | 1.60%  | 35660.57 | 8.27  |       |   |
| \$96-9  | tr F7ESU8            | 1        | 1        | 1.31%  | 42858.18 | 8.73  |       |   |
| \$96-10 | tr G3V9U2            | 1        | 1        | 1.26%  | 41783.42 | 8.37  |       |   |
| \$96-11 | tr Q5M857            | 1        | 1        | 1.26%  | 45123.96 | 8.98  |       |   |
|         | R15076_4 R. MAILR. I | 603.3647 | -0.00075 |        | 2        | 1     | 30.34 | 0 |
| \$97-1  | tr F1M9D8            | 1        | 1        | 1.58%  | 42293.78 | 9.64  |       |   |
| \$97-2  | tr Q9QZG4            | 1        | 1        | 2.70%  | 25099.1  | 9.67  |       |   |
|         | R15076_4 R. SMALLR.  | 690.3967 | 0.00396  |        | 2        | 1     | 31.21 | 0 |
| \$98-1  | tr F1MAP8            | 1        | 1        | 0.17%  | 460500   | 5.18  |       |   |
|         | R15076_4 K. SGETSVF  | 735.3632 | 0.00411  |        | 2        | 1     | 24.04 | 0 |
| \$99-1  | tr F7FBM8            | 1        | 1        | 3.60%  | 56827.95 | 7     |       |   |
| \$99-2  | tr Q63148            | 1        | 1        | 54.55% | 3584.1   | 8.14  |       |   |
| \$99-3  | tr F1LSA2            | 1        | 1        | 3.67%  | 55999.91 | 6.64  |       |   |
| \$99-4  | sp P04167            | 1        | 1        | 3.67%  | 55931.92 | 6.8   |       |   |

|          |                    |          |          |       |          |       |   |
|----------|--------------------|----------|----------|-------|----------|-------|---|
|          | R15076_4_K.ESGIAKI | 2038.043 | -0.01557 | 4     | 1        | 22.02 | 0 |
| \$100-1  | tr G3V811          | 1        | 1        | 1.50% | 83053.16 | 5.41  |   |
|          | R15076_4_K.TLNTEGV | 1203.669 | 0.00213  | 2     | 1        | 20.91 | 0 |
| \$101-1  | tr G3V8J5          | 1        | 1        | 0.78% | 109527.6 | 6.51  |   |
| \$101-2  | sp Q9ESQ7          | 1        | 1        | 1.23% | 70817.15 | 7.31  |   |
|          | R15076_4_K.LVAGEYI | 892.5138 | -0.00072 | 2     | 1        | 23.39 | 0 |
| \$102-1  | tr G3V931          | 1        | 1        | 0.91% | 74245.38 | 6.31  |   |
|          | R15076_4_M.SLPPEK. | 670.377  | 0.00015  | 2     | 1        | 21.66 | 0 |
| \$103-1  | tr G3V9E7          | 1        | 1        | 2.24% | 44200.49 | 8.17  |   |
| \$103-2  | tr G3V8E5          | 1        | 1        | 2.25% | 43877.14 | 7.5   |   |
|          | R15076_4_K.QREAEA1 | 1003.517 | 0.01136  | 2     | 1        | 34.98 | 0 |
| \$104-1  | tr G3V9Q5          | 1        | 1        | 3.79% | 49198.9  | 5.89  |   |
| \$104-2  | tr D3ZYW2          | 1        | 1        | 3.96% | 47074.63 | 5.93  |   |
| \$104-3  | sp Q8VHV7          | 1        | 1        | 3.79% | 49187.79 | 5.7   |   |
| \$104-4  | sp Q794E4          | 1        | 1        | 4.10% | 45729.37 | 5.31  |   |
| \$104-5  | tr F1LV61          | 1        | 1        | 4.17% | 44752.19 | 5.56  |   |
|          | R15076_4_R.ATENDIY | 1996.976 | 0.00358  | 2     | 1        | 69.28 | 0 |
| \$105-1  | tr MOR4F5          | 1        | 1        | 1.15% | 66914.46 | 8.13  |   |
|          | R15076_4_R.ILHLYQF | 914.5458 | -0.00161 | 3     | 1        | 21.13 | 0 |
| \$106-1  | tr MOR4Q5          | 1        | 1        | 1.23% | 54475.59 | 6.28  |   |
| \$106-2  | tr Q5U215          | 1        | 1        | 1.28% | 51932.79 | 6.24  |   |
|          | R15076_4_R.RLASPR. | 699.426  | 0.01328  | 2     | 1        | 32.87 | 0 |
| \$107-1  | tr MORBQ5          | 1        | 1        | 6.35% | 13907.94 | 10.31 |   |
| \$107-2  | tr D3ZNH4          | 1        | 1        | 5.80% | 15492.84 | 10.25 |   |
| \$107-3  | tr G3V9C7          | 1        | 1        | 6.35% | 13889.97 | 10.31 |   |
| \$107-4  | tr D3ZLY5          | 1        | 1        | 6.35% | 13920    | 10.31 |   |
| \$107-5  | tr D3ZNZ5          | 1        | 1        | 6.35% | 13994.04 | 10.37 |   |
| \$107-6  | tr MOR4L7          | 1        | 1        | 6.35% | 13909.96 | 10.31 |   |
| \$107-7  | tr D4A817          | 1        | 1        | 6.35% | 13907.99 | 10.31 |   |
| \$107-8  | tr G3V8B5          | 1        | 1        | 6.35% | 13905.97 | 10.31 |   |
| \$107-9  | sp Q00715          | 1        | 1        | 6.40% | 13990.05 | 10.37 |   |
| \$107-10 | tr D3ZWM5          | 1        | 1        | 6.35% | 13964.05 | 10.31 |   |
| \$107-11 | sp Q00725          | 1        | 1        | 6.30% | 14224.4  | 10.29 |   |
|          | R15076_4_K.HAVSEG1 | 828.421  | 0.00012  | 2     | 1        | 41.91 | 0 |
| \$108-1  | tr MORBW5          | 1        | 1        | 4.63% | 12364.1  | 9.4   |   |
| \$108-2  | tr MORC75          | 1        | 1        | 0.58% | 101348.6 | 8.43  |   |
|          | R15076_4_K.IFVDK.I | 621.3606 | 0.00791  | 2     | 1        | 20.91 | 0 |
| \$109-1  | tr MORC55          | 1        | 1        | 2.21% | 34798.11 | 9.26  |   |
|          | R15076_4_R.KDESTGK | 764.3785 | 0.01014  | 2     | 1        | 22.55 | 0 |
| \$110-1  | tr MORCX5          | 1        | 1        | 0.51% | 258557.7 | 8.76  |   |
| \$110-2  | tr MOR3L1          | 1        | 1        | 0.46% | 283411.5 | 8.85  |   |
| \$110-3  | tr F1M4F5          | 1        | 1        | 1.15% | 115019.5 | 6.34  |   |
| \$110-4  | tr F1M4F5          | 1        | 1        | 0.51% | 257977   | 8.74  |   |
|          | R15076_4_R.RKPRESI | 1505.807 | 0.02886  | 4     | 1        | 24.27 | 0 |
| \$111-1  | sp O08722          | 1        | 1        | 0.53% | 103519.6 | 5.84  |   |
| \$111-2  | tr F1LM75          | 1        | 1        | 0.54% | 103134.7 | 5.68  |   |
| \$111-3  | tr F1LNE2          | 1        | 1        | 0.53% | 103672.8 | 5.84  |   |
| \$111-4  | tr F1LRD2          | 1        | 1        | 0.57% | 96175.54 | 6.34  |   |
| \$111-5  | tr F1LW3C          | 1        | 1        | 0.52% | 106806.5 | 5.71  |   |
| \$111-6  | sp Q5PPN7          | 1        | 1        | 1.22% | 45812.78 | 8.22  |   |
| \$111-7  | sp O08721          | 1        | 1        | 0.56% | 98839.82 | 6.48  |   |
| \$111-8  | sp Q761X5          | 1        | 1        | 0.54% | 103133.7 | 5.72  |   |
| \$111-9  | tr R9PXV5          | 1        | 1        | 0.55% | 103719.6 | 8.45  |   |
| \$111-10 | sp Q6DGF5          | 1        | 1        | 1.87% | 31028.82 | 6.75  |   |

|          |                    |          |          |         |          |       |       |   |
|----------|--------------------|----------|----------|---------|----------|-------|-------|---|
| \$111-11 | sp P3356E          | 1        | 1        | 0.54%   | 105023.9 | 7.97  |       |   |
|          | R15076_4_R.IAYLR.F | 635.3875 | -0.00523 |         | 2        | 1     | 29.86 | 0 |
| \$112-1  | tr 055157          | 1        | 1        | 0.70%   | 96357.74 | 7.82  |       |   |
| \$112-2  | tr F1LQB8          | 1        | 1        | 0.45%   | 150351.3 | 4.46  |       |   |
| \$112-3  | tr G3V6A2          | 1        | 1        | 0.99%   | 65358.82 | 9.73  |       |   |
| \$112-4  | tr 03578E          | 1        | 1        | 0.45%   | 151044.9 | 4.44  |       |   |
|          | R15076_4_K.LQELVK. | 729.4505 | -0.00165 |         | 2        | 1     | 20.23 | 0 |
| \$113-1  | sp 088181          | 1        | 1        | 4.17%   | 41462.85 | 8.6   |       |   |
|          | R15076_4_R.TPPAPHF | 1804.034 | 0.01587  |         | 4        | 1     | 20.2  | 0 |
| \$114-1  | tr 088311          | 1        | 1        | 2.42%   | 36205.35 | 6.48  |       |   |
| \$114-2  | tr Q7M03E          | 1        | 1        | 100.00% | 928.13   | 8.75  |       |   |
| \$114-3  | tr Q9ZOU8          | 1        | 1        | 2.68%   | 33814.89 | 9.39  |       |   |
| \$114-4  | tr Q9QX8C          | 1        | 1        | 2.81%   | 30852.95 | 7.69  |       |   |
| \$114-5  | tr Q9QX81          | 1        | 1        | 2.41%   | 36232.38 | 6.48  |       |   |
|          | R15076_4_R.GFGFILF | 928.5291 | -0.00361 |         | 2        | 1     | 33.12 | 0 |
| \$115-1  | sp P0793E          | 1        | 1        | 4.42%   | 23603.06 | 4.61  |       |   |
|          | R15076_4_K.EDPEADG | 1140.444 | -0.00876 |         | 2        | 1     | 37.99 | 0 |
| \$116-1  | sp P1492E          | 1        | 1        | 0.72%   | 108673.9 | 5.78  |       |   |
| \$116-2  | tr F1LPH8          | 1        | 1        | 0.72%   | 108744.9 | 5.78  |       |   |
| \$116-3  | tr D4A1N8          | 1        | 1        | 0.80%   | 96895.09 | 5.92  |       |   |
|          | R15076_4_R.SPLSVFK | 777.4505 | -0.00115 |         | 2        | 1     | 20.74 | 0 |
| \$117-1  | sp P29314          | 1        | 1        | 4.64%   | 22591.14 | 10.66 |       |   |
| \$117-2  | tr D3ZV5C          | 1        | 1        | 4.64%   | 22647.23 | 10.32 |       |   |
|          | R15076_4_R.LFEGNAI | 1032.584 | -0.01182 |         | 3        | 1     | 20.41 | 0 |
| \$118-1  | sp P4212E          | 1        | 1        | 5.99%   | 36611.95 | 5.7   |       |   |
|          | R15076_4_K.ITVVGVC | 1973.092 | -0.00049 |         | 2        | 1     | 76.03 | 0 |
| \$119-1  | sp P4794E          | 1        | 1        | 1.75%   | 62276.84 | 5.95  |       |   |
|          | R15076_4_K.SAAEVI/ | 1015.553 | 0.00033  |         | 2        | 1     | 31.47 | 0 |
| \$120-1  | sp P5921E          | 1        | 1        | 4.24%   | 40068.11 | 5.34  |       |   |
| \$120-2  | tr D4ABTC          | 1        | 1        | 4.24%   | 40020    | 5.69  |       |   |
|          | R15076_4_R.IGAADYG | 1689.844 | -0.0085  |         | 2        | 1     | 40.3  | 0 |
| \$121-1  | sp P5938E          | 1        | 1        | 5.66%   | 24135.9  | 10.05 |       |   |
|          | R15076_4_R.QRRYHA/ | 1425.844 | -0.01448 |         | 4        | 1     | 21.34 | 0 |
| \$122-1  | sp P6315E          | 1        | 1        | 1.59%   | 83414.67 | 6.53  |       |   |
|          | R15076_4_R.ISKQEAG | 1320.716 | -0.00125 |         | 2        | 1     | 21.35 | 0 |
| \$123-1  | sp P68101          | 1        | 1        | 3.81%   | 36107.75 | 5.02  |       |   |
|          | R15076_4_K.VVTDTDF | 1348.659 | 0.00635  |         | 2        | 1     | 60.13 | 0 |
| \$124-1  | sp Q0517E          | 1        | 1        | 6.36%   | 21790.01 | 4.5   |       |   |
|          | R15076_4_K.ETPAASE | 1316.633 | -0.00129 |         | 2        | 1     | 58.93 | 0 |
| \$125-1  | sp Q0568E          | 1        | 1        | 1.37%   | 65401.59 | 6.45  |       |   |
|          | R15076_4_R.VLEDNEF | 1003.469 | -0.00367 |         | 2        | 1     | 25.06 | 0 |
| \$126-1  | tr Q2KP1C          | 1        | 1        | 5.05%   | 21783.36 | 7.45  |       |   |
|          | R15076_4_R.KMSIPES | 1177.577 | -0.01241 |         | 2        | 1     | 21.89 | 0 |
| \$127-1  | sp Q32Q9C          | 1        | 1        | 2.59%   | 22768.64 | 10.05 |       |   |
| \$127-2  | tr D4A3V2          | 1        | 1        | 3.85%   | 15223.58 | 10.15 |       |   |
|          | R15076_4_K.DFLSK.M | 609.3243 | -0.00098 |         | 2        | 1     | 24.18 | 0 |
| \$128-1  | sp Q499N4          | 1        | 1        | 2.94%   | 40405.49 | 9.17  |       |   |
|          | R15076_4_R.LGGAGLV | 1068.664 | 0.01027  |         | 2        | 1     | 28.39 | 0 |
| \$129-1  | sp Q4KLH4          | 1        | 1        | 3.07%   | 58758.93 | 6.26  |       |   |
|          | R15076_4_R.LFVGNLF | 1837.922 | -0.0109  |         | 2        | 1     | 49.47 | 0 |
| \$130-1  | sp Q4V7DE          | 1        | 1        | 4.26%   | 41518.28 | 6.57  |       |   |
| \$130-2  | tr Q4V8DE          | 1        | 1        | 4.78%   | 37399.9  | 9.07  |       |   |
|          | R15076_4_K.ADLILSY | 1898.036 | 0.03021  |         | 3        | 1     | 23.04 | 0 |
| \$131-1  | tr Q4V8HE          | 1        | 1        | 2.80%   | 53943.49 | 6.09  |       |   |



|         |                     |           |          |        |          |       |   |
|---------|---------------------|-----------|----------|--------|----------|-------|---|
|         | R15076_4_K. LEALIQF | 1487.869  | 0.02219  | 2      | 1        | 21.21 | 0 |
| \$132-1 | sp Q5EB5E           | 1         | 1        | 0.59%  | 156230   | 7     |   |
|         | R15076_4_K. LAGRGLI | 827.5461  | 0.0134   | 2      | 1        | 40.92 | 0 |
| \$133-1 | sp Q5FWYE           | 1         | 1        | 1.82%  | 37598.49 | 6.08  |   |
|         | R15076_4_R. VIQEGR. | 701.3941  | 0.00133  | 2      | 1        | 27.08 | 0 |
| \$134-1 | tr Q5M85Z           | 1         | 1        | 1.55%  | 43309.89 | 6.15  |   |
|         | R15076_4_K. LPQTPK. | 683.4086  | -0.01196 | 2      | 1        | 23.29 | 0 |
| \$135-1 | sp Q5M9IE           | 1         | 1        | 3.08%  | 29299.34 | 9.86  |   |
| \$135-2 | tr B1WC47           | 1         | 1        | 3.08%  | 29299.34 | 9.86  |   |
|         | R15076_4_R. KQPTGLS | 858.5043  | 0.01161  | 2      | 1        | 22.65 | 0 |
| \$136-1 | sp Q5PQLF           | 1         | 1        | 1.04%  | 63735.93 | 6.84  |   |
| \$136-2 | tr B1H29Z           | 1         | 1        | 0.87%  | 76414.71 | 5.92  |   |
|         | R15076_4_K. LPMVLK. | 700.4426  | 0.00986  | 2      | 1        | 28.15 | 0 |
| \$137-1 | sp Q5U2V4           | 1         | 1        | 2.73%  | 63026.7  | 8.73  |   |
|         | R15076_4_K. HIM*RYM | 1943.943  | 0.00503  | 4      | 1        | 21.69 | 0 |
| \$138-1 | sp Q5XIKC           | 1         | 1        | 1.25%  | 52997.23 | 5.35  |   |
|         | R15076_4_R. LAIEPR. | 698.4195  | -0.00088 | 2      | 1        | 23.19 | 0 |
| \$139-1 | sp Q5YLM1           | 1         | 1        | 0.48%  | 115300.1 | 6     |   |
|         | R15076_4_K. DLVPR.  | 1599.3511 | -0.00159 | 2      | 1        | 24.02 | 0 |
| \$140-1 | sp Q6309Z           | 1         | 1        | 2.58%  | 54104.88 | 5.37  |   |
| \$140-2 | tr F1LR8C           | 1         | 1        | 2.58%  | 54143.98 | 5.37  |   |
|         | R15076_4_K. GEEATGC | 1422.591  | -0.00134 | 2      | 1        | 67.57 | 0 |
| \$141-1 | sp Q6339C           | 1         | 1        | 8.66%  | 14441.31 | 9.6   |   |
|         | R15076_4_K. EQISDII | 1260.607  | -0.0061  | 2      | 1        | 43.74 | 0 |
| \$142-1 | sp Q63624           | 1         | 1        | 0.56%  | 133854.1 | 9.38  |   |
|         | R15076_4_R. WGGLDLF | 816.4363  | 0.0136   | 2      | 1        | 25.68 | 0 |
| \$143-1 | sp Q6462C           | 1         | 1        | 3.93%  | 35158.85 | 5.43  |   |
|         | R15076_4_R. AVPDSEF | 1335.738  | -0.00026 | 4      | 1        | 26.21 | 0 |
| \$144-1 | tr Q6QI3C           | 1         | 1        | 3.80%  | 17670.72 | 9.38  |   |
|         | R15076_4 -. MMKSK.  | 752.4157  | -0.00397 | 2      | 1        | 23.98 | 0 |
| \$145-1 | sp Q6WRHE           | 1         | 1        | 0.27%  | 284739.2 | 9.34  |   |
| \$145-2 | tr G3V7S1           | 1         | 1        | 0.27%  | 284479.9 | 9.34  |   |
|         | R15076_4_R. AEMRAEF | 862.4199  | 0.00998  | 2      | 1        | 25.14 | 0 |
| \$146-1 | tr Q71DI1           | 1         | 1        | 10.00% | 11283.74 | 6.09  |   |
|         | R15076_4_K. DAVEDLF | 1161.563  | -0.00936 | 2      | 1        | 29.12 | 0 |
| \$147-1 | tr Q76MJC           | 1         | 1        | 4.66%  | 35801.58 | 9.82  |   |
| \$147-2 | tr F1LPL7           | 1         | 1        | 4.66%  | 35676.48 | 9.77  |   |
| \$147-3 | tr Q3ZAVZ           | 1         | 1        | 4.60%  | 36200.04 | 9.87  |   |
| \$147-4 | sp P62961           | 1         | 1        | 4.66%  | 35729.52 | 9.87  |   |
| \$147-5 | tr D3ZEV            | 1         | 1        | 4.66%  | 35716.52 | 9.87  |   |
|         | R15076_4_K. NEGSES/ | 1587.699  | 0.00033  | 2      | 1        | 88.15 | 0 |
| \$148-1 | sp Q78P7E           | 1         | 1        | 12.36% | 10349.73 | 6.81  |   |
| \$148-2 | sp P6317C           | 1         | 1        | 12.36% | 10365.77 | 6.89  |   |
|         | R15076_4_R. NFGSYV1 | 1282.606  | -0.00648 | 2      | 1        | 51.93 | 0 |
| \$149-1 | tr Q7TMAE           | 1         | 1        | 0.59%  | 116460.2 | 9.21  |   |
| \$149-2 | tr F1M9H4           | 1         | 1        | 0.28%  | 225601.4 | 6.39  |   |
|         | R15076_4_R. LLISPR. | 698.4559  | -0.00075 | 2      | 1        | 20.87 | 0 |
| \$150-1 | sp Q8CGZZ           | 1         | 1        | 1.63%  | 70677.78 | 6.15  |   |
|         | R15076_4_K. QILLEN/ | 1170.673  | -0.01635 | 2      | 1        | 23.81 | 0 |
| \$151-1 | sp Q920AC           | 1         | 1        | 1.77%  | 51174.15 | 5.37  |   |
|         | R15076_4_K. LKWPQLS | 1027.605  | 0.01198  | 2      | 1        | 22.07 | 0 |
| \$152-1 | sp Q9EPHZ           | 1         | 1        | 6.53%  | 19846.89 | 4.66  |   |
|         | R15076_4_K. AAATPES | 1327.649  | 0.00118  | 2      | 1        | 66.31 | 0 |
| \$153-1 | tr Q9ER3Z           | 1         | 1        | 1.74%  | 72535.36 | 7.94  |   |

|         |                    |          |          |       |          |      |       |   |
|---------|--------------------|----------|----------|-------|----------|------|-------|---|
| \$153-2 | tr Q9ER3E          | 1        | 1        | 1.64% | 76419.54 | 6.89 |       |   |
| \$153-3 | tr Q9QWN7          | 1        | 1        | 1.80% | 70399.01 | 7.59 |       |   |
| \$153-4 | tr F1LR8E          | 1        | 1        | 1.80% | 70079.6  | 7.11 |       |   |
|         | R15076_4_R.TGFLEQC | 1250.656 | 0.02345  |       | 2        | 1    | 22.79 | 0 |
| \$154-1 | tr Q9ESV7          | 1        | 1        | 5.16% | 33127.74 | 9.65 |       |   |
|         | R15076_4_R.KAELAA1 | 1713.986 | -0.00701 |       | 2        | 1    | 21.39 | 0 |
| \$155-1 | sp Q9JKFE          | 1        | 1        | 2.14% | 31713.23 | 9.14 |       |   |
|         | R15076_4_K.LAAMIK. | 646.3956 | 0.00289  |       | 2        | 1    | 23.25 | 0 |
| \$156-1 | sp Q9JMDZ          | 1        | 1        | 1.04% | 97504.7  | 6.22 |       |   |
|         | R15076_4_R.KIAVVQF | 1011.62  | -0.00576 |       | 3        | 1    | 20.89 | 0 |
| \$157-1 | sp Q9QX6E          | 1        | 1        | 3.01% | 45239.44 | 7.57 |       |   |
|         | R15076_4_K.SLAENYF | 1359.618 | -0.0152  |       | 2        | 1    | 56.77 | 0 |
| \$158-1 | sp Q9QZME          | 1        | 1        | 0.85% | 129979.6 | 4.59 |       |   |
| \$158-2 | tr D3ZTIC          | 1        | 1        | 0.87% | 126924.5 | 4.62 |       |   |
| \$158-3 | tr D3ZTSE          | 1        | 1        | 0.92% | 119735.7 | 4.63 |       |   |
| \$158-4 | tr F1LN54          | 1        | 1        | 0.85% | 130006.8 | 4.63 |       |   |
| \$158-5 | tr D3ZIL4          | 1        | 1        | 0.94% | 117955.5 | 4.58 |       |   |
|         | R15076_4_K.LIRM*G1 | 1275.695 | 0.02227  |       | 2        | 1    | 23.54 | 0 |
| \$159-1 | sp Q9QZRE          | 1        | 1        | 0.80% | 293886.5 | 8.44 |       |   |
| \$159-2 | tr F1M78E          | 1        | 1        | 0.84% | 276424.7 | 8.5  |       |   |
|         | R15076_4_R.RSLSSCS | 2429.128 | -0.00992 |       | 4        | 1    | 20.07 | 0 |

----- summary -----

Total prc : 322

Total prc : 159

| UniPepCou | ProteinGr | Percent | ProteinCc | Percent |
|-----------|-----------|---------|-----------|---------|
| 1         | 124       | 77.99%  | 260       | 80.75%  |
| 2         | 12        | 7.55%   | 27        | 8.39%   |
| 3         | 6         | 3.77%   | 10        | 3.11%   |
| 4         | 3         | 1.89%   | 5         | 1.55%   |
| 5         | 5         | 3.14%   | 8         | 2.48%   |
| 6         | 2         | 1.26%   | 3         | 0.93%   |
| 7         | 1         | 0.63%   | 2         | 0.62%   |
| 8         | 1         | 0.63%   | 1         | 0.31%   |
| 10        | 1         | 0.63%   | 2         | 0.62%   |
| 11        | 1         | 0.63%   | 1         | 0.31%   |
| 13        | 2         | 1.26%   | 2         | 0.62%   |
| 18        | 1         | 0.63%   | 1         | 0.31%   |

| ExpectValIons | ReferenceDIFF_MODIPI | MissCleav | Modificat | MatchedTINum | Protea |
|---------------|----------------------|-----------|-----------|--------------|--------|
| 7.42E-03 0 0  | Q5XIF0               | 3.9       | 0         | 0            | 2      |
| 8.13E-05 0 0  | Q5XIF0               | 3.9       | 0         | 0            | 2      |
| 1.85E-01 0 0  | Q5XIF0               | 3.9       | 0         | 0            | 2      |
| 5.20E-05 0 0  | Q5XIF0               | 3.9       | 0         | 0            | 2      |
| 5.16E-10 0 0  | Q5XIF0               | 3.9       | 0         | 0            | 2      |
| 4.76E-06 0 0  | Q5XIF0               | 3.9       | 0         | 0            | 2      |
| 6.91E-06 0 0  | Q5XIF0               | 5.32      | 0         | 0            | 2      |
| 7.75E-04 0 0  | Q5XIF0               | 5.32      | 0         | 0            | 2      |
| 3.77E-07 0 0  | Q5XIF0               | 5.32      | 0         | 0            | 2      |
| 6.97E-15 0 0  | Q5XIF0               | 5.32      | 0         | 0            | 2      |
| 4.15E-09 0 0  | Q5XIF0               | 5.32      | 0         | 0            | 2      |
| 2.48E-08 0 0  | Q5XIF0               | 5.32      | 0         | 0            | 2      |
| 6.70E-15 0 0  | Q5XIF0               | 5.32      | 0         | 0            | 2      |
| 2.08E-12 0 0  | Q5XIF0               | 5.32      | 0         | 0            | 2      |
| 1.20E-07 0 0  | Q5XIF0               | 5.32      | 0         | 0            | 2      |
| 1.52E-13 0 0  | Q5XIF0               | 5.32      | 0         | 0            | 2      |
| 2.96E-09 0 0  | Q5XIF0               | 5.32      | 0         | 0            | 2      |
| 3.01E-10 0 0  | Q5XIF0               | 5.32      | 0         | 0            | 2      |
| 1.79E-15 0 0  | Q5XIF0               | 5.32      | 0         | 0            | 2      |
| 7.26E-09 0 0  | Q5XIF0               | 5.32      | 0         | 0            | 2      |
| 8.92E-08 0 0  | Q5XIF0               | 5.32      | 0         | 0            | 2      |
| 1.07E-08 0 0  | Q5XIF0               | 5.32      | 0         | 0            | 2      |
| 9.86E-14 0 0  | Q5XIF0               | 5.32      | 0         | 0            | 2      |
| 1.51E-04 0 0  | Q5XIF0               | 5.32      | 0         | 0            | 2      |
| 1.85E-06 0 0  | Q5XIF0               | 5.32      | 0         | 0            | 2      |
| 7.95E-09 0 0  | Q5XIF0               | 5.32      | 0         | 0            | 2      |
| 4.69E-08 0 0  | Q5XIF0               | 5.32      | 0         | 0            | 2      |
| 3.49E-10 0 0  | Q5XIF0               | 5.32      | 0         | 0            | 2      |
| 3.32E-06 0 0  | Q5XIF0               | 5.32      | 0         | 0            | 2      |
| 3.02E-06 0 0  | Q5XIF0               | 5.32      | 0         | 0            | 2      |
| 1.57E-07 0 0  | Q5XIF0               | 5.32      | 0         | 0            | 2      |
| 3.20E-09 0 0  | Q5XIF0               | 5.32      | 0         | 0            | 2      |
| 1.20E-07 0 0  | Q5XIF0               | 5.32      | 0         | 0            | 2      |
| 8.96E-06 0 0  | Q5XIF0               | 5.32      | 0         | 0            | 2      |
| 1.56E-07 0 0  | Q5XIF0               | 5.32      | 0         | 0            | 2      |
| 4.92E-08 0 0  | Q5XIF0               | 5.32      | 0         | 0            | 2      |
| 1.08E-05 0 0  | Q5XIF0               | 5.32      | 0         | 0            | 2      |
| 1.23E-08 0 0  | Q5XIF0               | 5.32      | 0         | 0            | 2      |
| 9.54E-02 0 0  | Q5XIF0               | 5.32      | 0         | 0            | 2      |
| 7.09E-09 0 0  | Q5XIF0               | 5.32      | 0         | 0            | 2      |
| 9.35E-03 0 0  | Q5XIF0               | 8.26      | 0         | 0            | 2      |
| 9.02E-04 0 0  | D3ZGW2 ! Q5XIF0      | 9.75      | 0         | 0            | 2      |
| 4.35E-03 0 0  | Q5XIF0               | 3.93      | 0         | 0            | 2      |
| 9.55E-05 0 0  | Q5XIF0               | 3.93      | 0         | 0            | 2      |
| 3.11E-04 0 0  | Q5XIF0               | 4.48      | 0         | 0            | 2      |
| 1.25E-01 0 0  | Q5XIF0               | 4.48      | 0         | 0            | 2      |
| 4.48E-08 0 0  | Q5XIF0               | 4.48      | 0         | 0            | 2      |
| 2.39E-01 0 0  | Q5XIF0               | 4.48      | 0         | 0            | 2      |
| 8.89E-09 0 0  | Q5XIF0               | 4.48      | 0         | 0            | 2      |
| 7.32E-04 0 0  | Q5XIF0               | 4.48      | 0         | 0            | 2      |
| 1.92E-10 0 0  | Q5XIF0               | 4.48      | 0         | 0            | 2      |

|               |        |       |              |   |   |
|---------------|--------|-------|--------------|---|---|
| 9. 70E-07 0 0 | Q5XIF0 | 4. 48 | 0            | 0 | 2 |
| 2. 65E-06 0 0 | Q5XIF0 | 4. 48 | 0            | 0 | 2 |
| 8. 34E-11 0 0 | Q5XIF0 | 4. 48 | 0            | 0 | 2 |
| 3. 64E-04 0 0 | Q5XIF0 | 4. 48 | 0            | 0 | 2 |
| 1. 52E-01 0 0 | Q5XIF0 | 4. 48 | 0            | 0 | 2 |
| 3. 10E-09 0 0 | Q5XIF0 | 4. 48 | 0            | 0 | 2 |
| 8. 20E-06 0 0 | Q5XIF0 | 4. 48 | 0            | 0 | 2 |
| 1. 67E-10 0 0 | Q5XIF0 | 4. 48 | 0            | 0 | 2 |
| 1. 59E-06 0 0 | Q5XIF0 | 4. 48 | 0            | 0 | 2 |
| 3. 81E-12 0 0 | Q5XIF0 | 4. 48 | 0            | 0 | 2 |
| 6. 53E-03 0 0 | Q5XIF0 | 4. 48 | 0            | 0 | 2 |
| 1. 46E-04 0 0 | Q5XIF0 | 4. 48 | 0            | 0 | 2 |
| 5. 50E-09 0 0 | Q5XIF0 | 4. 48 | 0            | 0 | 2 |
| 1. 68E-04 0 0 | Q5XIF0 | 4. 48 | 0            | 0 | 2 |
| 3. 11E-05 0 0 | Q5XIF0 | 4. 48 | 0            | 0 | 2 |
| 1. 77E-04 0 0 | Q5XIF0 | 4. 48 | 0            | 0 | 2 |
| 3. 11E-02 0 0 | Q5XIF0 | 4. 48 | 0            | 0 | 2 |
| 3. 23E-06 0 0 | Q5XIF0 | 4. 48 | 0            | 0 | 2 |
| 4. 45E-06 0 0 | Q5XIF0 | 4. 48 | 0            | 0 | 2 |
| 4. 61E-03 0 0 | Q5XIF0 | 4. 48 | 0            | 0 | 2 |
| 7. 73E-06 0 0 | Q5XIF0 | 4. 48 | 0            | 0 | 2 |
| 5. 00E-07 0 0 | Q5XIF0 | 4. 48 | 0            | 0 | 2 |
| 3. 65E-07 0 0 | Q5XIF0 | 4. 48 | 0            | 0 | 2 |
| 3. 32E-06 0 0 | Q5XIF0 | 4. 48 | 0            | 0 | 2 |
| 1. 18E-04 0 0 | Q5XIF0 | 4. 48 | 0            | 0 | 2 |
| 2. 47E-02 0 0 | Q5XIF0 | 4. 53 | 0            | 0 | 2 |
| 8. 93E-02 0 0 | Q5XIF0 | 4. 33 | 1            | 0 | 2 |
| 1. 87E-04 0 0 | Q5XIF0 | 6. 1  | 0            | 0 | 2 |
| 3. 67E-04 0 0 | Q5XIF0 | 6. 1  | 0            | 0 | 2 |
| 1. 76E-03 0 0 | Q5XIF0 | 6. 1  | 0            | 0 | 2 |
| 1. 62E-04 0 0 | Q5XIF0 | 6. 1  | 0            | 0 | 2 |
| 4. 38E-04 0 0 | Q5XIF0 | 6. 1  | 0            | 0 | 2 |
| 1. 48E-02 0 0 | Q5XIF0 | 6. 1  | 0            | 0 | 2 |
| 5. 05E-02 0 0 | Q5XIF0 | 6. 1  | 0            | 0 | 2 |
| 3. 07E-03 0 0 | Q5XIF0 | 6. 1  | 0            | 0 | 2 |
| 3. 58E-03 0 0 | Q5XIF0 | 9. 51 | 1            | 0 | 2 |
| 2. 66E-04 0 0 | Q5XIF0 | 5. 32 | 0 15. 994919 | 0 | 2 |
| 9. 50E-05 0 0 | Q5XIF0 | 5. 32 | 0 15. 994919 | 0 | 2 |
| 7. 56E-04 0 0 | Q5XIF0 | 5. 32 | 0 15. 994919 | 0 | 2 |
| 3. 09E-02 0 0 | Q5XIF0 | 5. 32 | 0 15. 994919 | 0 | 2 |
| 4. 00E-03 0 0 | Q5XIF0 | 5. 32 | 0 15. 994919 | 0 | 2 |
| 1. 09E-04 0 0 | Q5XIF0 | 5. 32 | 0 15. 994919 | 0 | 2 |
| 2. 19E-04 0 0 | Q5XIF0 | 5. 32 | 0 15. 994919 | 0 | 2 |
| 4. 45E-02 0 0 | Q5XIF0 | 5. 32 | 0 15. 994919 | 0 | 2 |
| 8. 33E-02 0 0 | Q5XIF0 | 5. 32 | 0 15. 994919 | 0 | 2 |
| 4. 18E-12 0 0 | Q5XIF0 | 5. 32 | 0            | 0 | 2 |
| 3. 85E-06 0 0 | Q5XIF0 | 5. 32 | 0            | 0 | 2 |
| 4. 33E-10 0 0 | Q5XIF0 | 5. 32 | 0            | 0 | 2 |
| 1. 68E-13 0 0 | Q5XIF0 | 5. 32 | 0            | 0 | 2 |
| 3. 94E-06 0 0 | Q5XIF0 | 5. 32 | 0            | 0 | 2 |
| 7. 24E-11 0 0 | Q5XIF0 | 5. 32 | 0            | 0 | 2 |
| 1. 54E-06 0 0 | Q5XIF0 | 5. 32 | 0            | 0 | 2 |
| 4. 32E-09 0 0 | Q5XIF0 | 5. 32 | 0            | 0 | 2 |
| 1. 93E-07 0 0 | Q5XIF0 | 5. 32 | 0            | 0 | 2 |

|               |        |       |   |   |   |
|---------------|--------|-------|---|---|---|
| 1. 56E-09 0 0 | Q5XIF0 | 5. 32 | 0 | 0 | 2 |
| 3. 32E-06 0 0 | Q5XIF0 | 5. 32 | 0 | 0 | 2 |
| 7. 52E-08 0 0 | Q5XIF0 | 5. 32 | 0 | 0 | 2 |
| 7. 58E-07 0 0 | Q5XIF0 | 5. 32 | 0 | 0 | 2 |
| 1. 43E-07 0 0 | Q5XIF0 | 5. 32 | 0 | 0 | 2 |
| 2. 31E-05 0 0 | Q5XIF0 | 5. 32 | 0 | 0 | 2 |
| 3. 58E-08 0 0 | Q5XIF0 | 5. 32 | 0 | 0 | 2 |
| 1. 84E-07 0 0 | Q5XIF0 | 5. 32 | 0 | 0 | 2 |
| 5. 94E-07 0 0 | Q5XIF0 | 5. 32 | 0 | 0 | 2 |
| 1. 77E-07 0 0 | Q5XIF0 | 5. 32 | 0 | 0 | 2 |
| 6. 17E-07 0 0 | Q5XIF0 | 5. 32 | 0 | 0 | 2 |
| 1. 15E-08 0 0 | Q5XIF0 | 5. 32 | 0 | 0 | 2 |
| 1. 10E-07 0 0 | Q5XIF0 | 5. 32 | 0 | 0 | 2 |
| 7. 65E-11 0 0 | Q5XIF0 | 5. 32 | 0 | 0 | 2 |
| 1. 66E-06 0 0 | Q5XIF0 | 5. 32 | 0 | 0 | 2 |
| 4. 88E-10 0 0 | Q5XIF0 | 5. 32 | 0 | 0 | 2 |
| 1. 71E-06 0 0 | Q5XIF0 | 5. 32 | 0 | 0 | 2 |
| 2. 14E-11 0 0 | Q5XIF0 | 5. 32 | 0 | 0 | 2 |
| 1. 82E-07 0 0 | Q5XIF0 | 5. 32 | 0 | 0 | 2 |
| 5. 26E-05 0 0 | Q5XIF0 | 5. 32 | 0 | 0 | 2 |
| 1. 78E-07 0 0 | Q5XIF0 | 5. 32 | 0 | 0 | 2 |
| 1. 45E-05 0 0 | Q5XIF0 | 5. 32 | 0 | 0 | 2 |
| 1. 72E-06 0 0 | Q5XIF0 | 5. 32 | 0 | 0 | 2 |
| 1. 79E-06 0 0 | Q5XIF0 | 5. 32 | 0 | 0 | 2 |
| 7. 78E-08 0 0 | Q5XIF0 | 5. 32 | 0 | 0 | 2 |
| 2. 71E-05 0 0 | Q5XIF0 | 5. 32 | 0 | 0 | 2 |
| 8. 58E-06 0 0 | Q5XIF0 | 5. 32 | 0 | 0 | 2 |
| 3. 73E-09 0 0 | Q5XIF0 | 5. 32 | 0 | 0 | 2 |
| 1. 10E-09 0 0 | Q5XIF0 | 5. 32 | 0 | 0 | 2 |
| 2. 98E-03 0 0 | Q5XIF0 | 8. 59 | 0 | 0 | 2 |
| 5. 29E-02 0 0 | Q5XIF0 | 8. 59 | 0 | 0 | 2 |
| 1. 83E-03 0 0 | Q5XIF0 | 8. 59 | 0 | 0 | 2 |
| 1. 72E-02 0 0 | Q5XIF0 | 8. 59 | 0 | 0 | 2 |
| 1. 79E-02 0 0 | Q5XIF0 | 8. 59 | 0 | 0 | 2 |
| 5. 40E-03 0 0 | Q5XIF0 | 8. 59 | 0 | 0 | 2 |
| 5. 50E-03 0 0 | Q5XIF0 | 8. 59 | 0 | 0 | 2 |
| 2. 98E-03 0 0 | Q5XIF0 | 8. 59 | 0 | 0 | 2 |
| 3. 22E-02 0 0 | Q5XIF0 | 8. 59 | 0 | 0 | 2 |
| 2. 85E-03 0 0 | Q5XIF0 | 8. 59 | 0 | 0 | 2 |
| 1. 81E-02 0 0 | Q5XIF0 | 8. 59 | 0 | 0 | 2 |
| 5. 52E-03 0 0 | Q5XIF0 | 8. 59 | 0 | 0 | 2 |
| 5. 50E-02 0 0 | Q5XIF0 | 8. 59 | 0 | 0 | 2 |
| 1. 09E-01 0 0 | Q5XIF0 | 8. 59 | 0 | 0 | 2 |
| 4. 32E-02 0 0 | Q5XIF0 | 8. 59 | 0 | 0 | 2 |
| 1. 98E-03 0 0 | Q5XIF0 | 8. 59 | 0 | 0 | 2 |
| 3. 26E-03 0 0 | Q5XIF0 | 8. 59 | 0 | 0 | 2 |
| 3. 28E-03 0 0 | Q5XIF0 | 8. 59 | 0 | 0 | 2 |
| 2. 50E-01 0 0 | Q5XIF0 | 8. 59 | 0 | 0 | 2 |
| 3. 05E-03 0 0 | Q5XIF0 | 8. 59 | 0 | 0 | 2 |
| 4. 14E-02 0 0 | Q5XIF0 | 8. 59 | 0 | 0 | 2 |
| 1. 56E-01 0 0 | Q5XIF0 | 8. 59 | 0 | 0 | 2 |
| 4. 11E-02 0 0 | Q5XIF0 | 8. 59 | 0 | 0 | 2 |
| 4. 85E-02 0 0 | Q5XIF0 | 8. 59 | 0 | 0 | 2 |
| 3. 07E-02 0 0 | Q5XIF0 | 8. 59 | 0 | 0 | 2 |

|               |        |       |              |   |   |
|---------------|--------|-------|--------------|---|---|
| 6. 30E-05 0 0 | Q5XIF0 | 4. 37 | 0            | 0 | 2 |
| 4. 17E-02 0 0 | Q5XIF0 | 4. 37 | 0            | 0 | 2 |
| 6. 23E-05 0 0 | Q5XIF0 | 4. 37 | 0            | 0 | 2 |
| 1. 66E-02 0 0 | Q5XIF0 | 4. 37 | 0            | 0 | 2 |
| 6. 16E-06 0 0 | Q5XIF0 | 4. 37 | 0            | 0 | 2 |
| 4. 45E-05 0 0 | Q5XIF0 | 4. 37 | 0            | 0 | 2 |
| 7. 48E-06 0 0 | Q5XIF0 | 4. 37 | 0            | 0 | 2 |
| 8. 82E-06 0 0 | Q5XIF0 | 4. 37 | 0            | 0 | 2 |
| 7. 90E-04 0 0 | Q5XIF0 | 4. 37 | 0            | 0 | 2 |
| 2. 78E-01 0 0 | Q5XIF0 | 4. 37 | 0            | 0 | 2 |
| 4. 71E-03 0 0 | Q5XIF0 | 4. 37 | 0            | 0 | 2 |
| 3. 06E-03 0 0 | Q5XIF0 | 4. 37 | 0            | 0 | 2 |
| 2. 37E-02 0 0 | Q5XIF0 | 4. 37 | 0            | 0 | 2 |
| 2. 65E-03 0 0 | Q5XIF0 | 4. 37 | 0            | 0 | 2 |
| 3. 51E-06 0 0 | Q5XIF0 | 4. 37 | 0            | 0 | 2 |
| 3. 90E-04 0 0 | Q5XIF0 | 4. 37 | 0            | 0 | 2 |
| 1. 83E-03 0 0 | Q5XIF0 | 4. 37 | 0            | 0 | 2 |
| 1. 63E-03 0 0 | Q5XIF0 | 4. 37 | 0            | 0 | 2 |
| 1. 22E-01 0 0 | Q5XIF0 | 4. 37 | 0            | 0 | 2 |
| 2. 10E-01 0 0 | Q5XIF0 | 4. 37 | 0            | 0 | 2 |
| 1. 07E-01 0 0 | Q5XIF0 | 4. 37 | 0            | 0 | 2 |
| 3. 90E-03 0 0 | Q5XIF0 | 4. 37 | 0            | 0 | 2 |
| 3. 50E-03 0 0 | Q5XIF0 | 4. 37 | 0            | 0 | 2 |
| 8. 05E-03 0 0 | Q5XIF0 | 4. 37 | 0            | 0 | 2 |
| 2. 53E-03 0 0 | Q5XIF0 | 4. 37 | 0            | 0 | 2 |
| 2. 07E-03 0 0 | Q5XIF0 | 4. 41 | 1            | 0 | 2 |
| 6. 64E-05 0 0 | Q5XIF0 | 4. 41 | 1            | 0 | 2 |
| 3. 92E-02 0 0 | Q5XIF0 | 8. 6  | 1            | 0 | 2 |
| 1. 57E-02 0 0 | Q5XIF0 | 8. 6  | 1            | 0 | 2 |
| 4. 45E-03 0 0 | Q5XIF0 | 8. 6  | 1            | 0 | 2 |
| 4. 21E-03 0 0 | Q5XIF0 | 8. 6  | 1            | 0 | 2 |
| 1. 03E-04 0 0 | Q5XIF0 | 8. 6  | 1            | 0 | 2 |
| 7. 98E-03 0 0 | Q5XIF0 | 8. 6  | 1            | 0 | 2 |
| 8. 83E-03 0 0 | Q5XIF0 | 8. 6  | 1            | 0 | 2 |
| 4. 31E-04 0 0 | Q5XIF0 | 8. 6  | 1            | 0 | 2 |
| 5. 87E-03 0 0 | Q5XIF0 | 8. 6  | 1            | 0 | 2 |
| 1. 57E-01 0 0 | Q5XIF0 | 8. 6  | 1            | 0 | 2 |
| 3. 32E-04 0 0 | Q5XIF0 | 8. 6  | 1            | 0 | 2 |
| 2. 80E-03 0 0 | Q5XIF0 | 8. 6  | 1            | 0 | 2 |
| 9. 50E-03 0 0 | Q5XIF0 | 8. 6  | 1            | 0 | 2 |
| 2. 06E-03 0 0 | Q5XIF0 | 8. 6  | 1            | 0 | 2 |
| 9. 48E-04 0 0 | Q5XIF0 | 8. 6  | 1            | 0 | 2 |
| 1. 73E-03 0 0 | Q5XIF0 | 8. 6  | 1            | 0 | 2 |
| 3. 11E-13 0 0 | Q5XIF0 | 3. 99 | 0 15. 994919 | 0 | 2 |
| 2. 13E-02 0 0 | Q5XIF0 | 3. 99 | 0 15. 994919 | 0 | 2 |
| 1. 56E-02 0 0 | Q5XIF0 | 3. 99 | 0 15. 994919 | 0 | 2 |
| 8. 32E-06 0 0 | Q5XIF0 | 3. 99 | 0            | 0 | 2 |
| 6. 71E-14 0 0 | Q5XIF0 | 3. 99 | 0            | 0 | 2 |
| 1. 14E-11 0 0 | Q5XIF0 | 3. 99 | 0            | 0 | 2 |
| 5. 19E-12 0 0 | Q5XIF0 | 3. 99 | 0            | 0 | 2 |
| 6. 11E-12 0 0 | Q5XIF0 | 3. 99 | 0            | 0 | 2 |
| 1. 17E-07 0 0 | Q5XIF0 | 3. 99 | 0            | 0 | 2 |
| 1. 19E-05 0 0 | Q5XIF0 | 3. 99 | 0            | 0 | 2 |
| 4. 59E-12 0 0 | Q5XIF0 | 3. 99 | 0            | 0 | 2 |

|               |        |      |   |   |   |
|---------------|--------|------|---|---|---|
| 4. 80E-05 0 0 | Q5XIF0 | 3.99 | 0 | 0 | 2 |
| 6. 56E-03 0 0 | Q5XIF0 | 3.99 | 0 | 0 | 2 |
| 9. 70E-13 0 0 | Q5XIF0 | 3.99 | 0 | 0 | 2 |
| 1. 13E-08 0 0 | Q5XIF0 | 3.99 | 0 | 0 | 2 |
| 1. 85E-12 0 0 | Q5XIF0 | 3.99 | 0 | 0 | 2 |
| 2. 06E-06 0 0 | Q5XIF0 | 3.99 | 0 | 0 | 2 |
| 4. 06E-10 0 0 | Q5XIF0 | 3.99 | 0 | 0 | 2 |
| 2. 16E-04 0 0 | Q5XIF0 | 3.99 | 0 | 0 | 2 |
| 3. 62E-14 0 0 | Q5XIF0 | 3.99 | 0 | 0 | 2 |
| 2. 04E-10 0 0 | Q5XIF0 | 3.99 | 0 | 0 | 2 |
| 4. 61E-12 0 0 | Q5XIF0 | 3.99 | 0 | 0 | 2 |
| 2. 33E-12 0 0 | Q5XIF0 | 3.99 | 0 | 0 | 2 |
| 1. 30E-11 0 0 | Q5XIF0 | 3.99 | 0 | 0 | 2 |
| 1. 57E-02 0 0 | Q5XIF0 | 4.37 | 0 | 0 | 2 |
| 1. 39E-03 0 0 | Q5XIF0 | 4.37 | 0 | 0 | 2 |
| 2. 33E-05 0 0 | Q5XIF0 | 4.37 | 0 | 0 | 2 |
| 4. 26E-07 0 0 | Q5XIF0 | 4.37 | 0 | 0 | 2 |
| 4. 50E-05 0 0 | Q5XIF0 | 4.37 | 0 | 0 | 2 |
| 9. 74E-05 0 0 | Q5XIF0 | 4.37 | 0 | 0 | 2 |
| 1. 43E-04 0 0 | Q5XIF0 | 4.37 | 0 | 0 | 2 |
| 6. 96E-04 0 0 | Q5XIF0 | 4.37 | 0 | 0 | 2 |
| 2. 74E-04 0 0 | Q5XIF0 | 4.37 | 0 | 0 | 2 |
| 4. 48E-05 0 0 | Q5XIF0 | 4.37 | 0 | 0 | 2 |
| 5. 48E-04 0 0 | Q5XIF0 | 4.37 | 0 | 0 | 2 |
| 3. 48E-04 0 0 | Q5XIF0 | 4.37 | 0 | 0 | 2 |
| 2. 26E-04 0 0 | Q5XIF0 | 4.37 | 0 | 0 | 2 |
| 1. 37E-04 0 0 | Q5XIF0 | 4.37 | 0 | 0 | 2 |
| 3. 01E-04 0 0 | Q5XIF0 | 4.37 | 0 | 0 | 2 |
| 5. 31E-04 0 0 | Q5XIF0 | 4.37 | 0 | 0 | 2 |
| 7. 36E-05 0 0 | Q5XIF0 | 4.37 | 0 | 0 | 2 |
| 5. 63E-04 0 0 | Q5XIF0 | 4.37 | 0 | 0 | 2 |
| 6. 52E-03 0 0 | Q5XIF0 | 4.37 | 0 | 0 | 2 |
| 1. 68E-05 0 0 | Q5XIF0 | 4.37 | 0 | 0 | 2 |
| 7. 01E-04 0 0 | Q5XIF0 | 4.37 | 0 | 0 | 2 |
| 5. 66E-05 0 0 | Q5XIF0 | 4.37 | 0 | 0 | 2 |
| 9. 28E-06 0 0 | Q5XIF0 | 4.37 | 0 | 0 | 2 |
| 2. 02E-02 0 0 | Q5XIF0 | 4.37 | 0 | 0 | 2 |
| 2. 70E-03 0 0 | Q5XIF0 | 4.37 | 0 | 0 | 2 |
| 5. 05E-03 0 0 | Q5XIF0 | 4.37 | 0 | 0 | 2 |
| 2. 36E-03 0 0 | Q5XIF0 | 4.37 | 0 | 0 | 2 |
| 1. 92E-02 0 0 | Q5XIF0 | 6.71 | 0 | 0 | 2 |
| 2. 64E-04 0 0 | Q5XIF0 | 6.71 | 0 | 0 | 2 |
| 2. 43E-03 0 0 | Q5XIF0 | 6.71 | 0 | 0 | 2 |
| 3. 30E-04 0 0 | Q5XIF0 | 6.71 | 0 | 0 | 2 |
| 3. 57E-03 0 0 | Q5XIF0 | 6.71 | 0 | 0 | 2 |
| 1. 87E-03 0 0 | Q5XIF0 | 6.71 | 0 | 0 | 2 |
| 5. 94E-03 0 0 | Q5XIF0 | 6.71 | 0 | 0 | 2 |
| 3. 01E-04 0 0 | Q5XIF0 | 6.71 | 0 | 0 | 2 |
| 1. 69E-02 0 0 | Q5XIF0 | 6.71 | 0 | 0 | 2 |
| 8. 09E-03 0 0 | Q5XIF0 | 6.71 | 0 | 0 | 2 |
| 4. 23E-02 0 0 | Q5XIF0 | 6.71 | 0 | 0 | 2 |
| 6. 00E-04 0 0 | Q5XIF0 | 6.71 | 0 | 0 | 2 |
| 6. 81E-03 0 0 | Q5XIF0 | 6.71 | 0 | 0 | 2 |
| 2. 55E-02 0 0 | Q5XIF0 | 6.71 | 0 | 0 | 2 |

|               |                    |       |              |   |   |
|---------------|--------------------|-------|--------------|---|---|
| 9. 28E-04 0 0 | Q5XIF0             | 6. 71 | 0            | 0 | 2 |
| 1. 51E-02 0 0 | Q5XIF0             | 6. 71 | 0            | 0 | 2 |
| 6. 34E-04 0 0 | Q5XIF0             | 6. 71 | 0            | 0 | 2 |
| 3. 52E-03 0 0 | Q5XIF0             | 6. 71 | 0            | 0 | 2 |
| 2. 68E-04 0 0 | Q5XIF0             | 6. 71 | 0            | 0 | 2 |
| 3. 46E-02 0 0 | Q5XIF0             | 6. 71 | 0            | 0 | 2 |
| 1. 66E-03 0 0 | Q5XIF0             | 6. 71 | 0            | 0 | 2 |
| 1. 26E-03 0 0 | Q5XIF0             | 6. 71 | 0            | 0 | 2 |
| 2. 61E-02 0 0 | Q5XIF0             | 6. 71 | 0            | 0 | 2 |
| 5. 48E-04 0 0 | Q5XIF0             | 6. 71 | 0            | 0 | 2 |
| 6. 70E-04 0 0 | Q5XIF0             | 6. 71 | 0            | 0 | 2 |
| 4. 67E-04 0 0 | Q5XIF0             | 6. 71 | 0            | 0 | 2 |
| 2. 24E-03 0 0 | Q5XIF0             | 6. 71 | 0            | 0 | 2 |
| 1. 44E-01 0 0 | Q5XIF0             | 6. 71 | 0            | 0 | 2 |
| 3. 16E-04 0 0 | Q5XIF0             | 6. 71 | 0            | 0 | 2 |
| 9. 87E-04 0 0 | Q5XIF0             | 6. 71 | 0            | 0 | 2 |
| 9. 69E-04 0 0 | Q5XIF0             | 6. 71 | 0            | 0 | 2 |
| 2. 21E-03 0 0 | Q5XIF0             | 6. 71 | 0            | 0 | 2 |
| 6. 60E-04 0 0 | Q5XIF0             | 6. 71 | 0            | 0 | 2 |
|               |                    |       |              |   |   |
| 1. 44E-02 0 0 | P85108/Q3KRE8/Q6P9 | 4. 14 | 0 15. 994919 | 0 | 2 |
| 1. 09E-03 0 0 | P85108/Q3KRE8/Q6P9 | 4. 14 | 0            | 0 | 2 |
| 1. 28E-02 0 0 | P85108/Q3KRE8/Q6P9 | 4. 68 | 1            | 0 | 2 |
| 6. 17E-02 0 0 | P85108/Q3KRE8/Q4QF | 9. 75 | 0 15. 994919 | 0 | 2 |
| 8. 16E-05 0 0 | P85108/Q3KRE8/Q4QF | 9. 75 | 0            | 0 | 2 |
| 1. 14E-01 0 0 | P85108/Q3KRE8/P69E | 6. 73 | 0            | 0 | 2 |
| 3. 31E-04 0 0 | P85108/Q3KRE8/Q4QF | 5. 83 | 0 15. 994919 | 0 | 2 |
| 2. 30E-04 0 0 | P85108/Q3KRE8/Q4QF | 5. 83 | 0            | 0 | 2 |
| 4. 37E-04 0 0 | P85108/Q3KRE8/Q6P9 | 6     | 0            | 0 | 2 |
| 1. 95E-02 0 0 | P85108/Q3KRE8/Q4QF | 4. 03 | 0 15. 994919 | 0 | 2 |
| 5. 50E-04 0 0 | P69897             | 4. 37 | 0            | 0 | 2 |
| 3. 71E-04 0 0 | P85108/Q3KRE8/Q4QF | 5. 84 | 0            | 0 | 2 |
| 2. 44E-04 0 0 | P85108/Q3KRE8/Q4QF | 5. 84 | 0            | 0 | 2 |
| 5. 14E-03 0 0 | P85108/Q3KRE8/Q4QF | 5. 84 | 0            | 0 | 2 |
| 1. 28E-06 0 0 | Q4QRB4/Q6P9T8/P69E | 8. 75 | 0            | 0 | 2 |
| 6. 45E-03 0 0 | P85108/Q3KRE8/Q4QF | 6     | 0 15. 994919 | 0 | 2 |
| 7. 05E-06 0 0 | P69897             | 6     | 0            | 0 | 2 |
| 4. 73E-01 0 0 | P85108/Q3KRE8/Q6P9 | 8. 46 | 0            | 0 | 2 |
|               |                    |       |              |   |   |
| 1. 44E-02 0 0 | P85108/Q3KRE8/Q6P9 | 4. 14 | 0 15. 994919 | 0 | 2 |
| 1. 09E-03 0 0 | P85108/Q3KRE8/Q6P9 | 4. 14 | 0            | 0 | 2 |
| 1. 28E-02 0 0 | P85108/Q3KRE8/Q6P9 | 4. 68 | 1            | 0 | 2 |
| 6. 17E-02 0 0 | P85108/Q3KRE8/Q4QF | 9. 75 | 0 15. 994919 | 0 | 2 |
| 8. 16E-05 0 0 | P85108/Q3KRE8/Q4QF | 9. 75 | 0            | 0 | 2 |
| 1. 14E-01 0 0 | P85108/Q3KRE8/P69E | 6. 73 | 0            | 0 | 2 |
| 2. 43E-05 0 0 | P85108/Q3KRE8/Q6P9 | 5. 75 | 0            | 0 | 2 |
| 3. 31E-04 0 0 | P85108/Q3KRE8/Q4QF | 5. 83 | 0 15. 994919 | 0 | 2 |
| 2. 30E-04 0 0 | P85108/Q3KRE8/Q4QF | 5. 83 | 0            | 0 | 2 |
| 4. 37E-04 0 0 | P85108/Q3KRE8/Q6P9 | 6     | 0            | 0 | 2 |
| 1. 95E-02 0 0 | P85108/Q3KRE8/Q4QF | 4. 03 | 0 15. 994919 | 0 | 2 |
| 3. 71E-04 0 0 | P85108/Q3KRE8/Q4QF | 5. 84 | 0            | 0 | 2 |
| 2. 44E-04 0 0 | P85108/Q3KRE8/Q4QF | 5. 84 | 0            | 0 | 2 |
| 5. 14E-03 0 0 | P85108/Q3KRE8/Q4QF | 5. 84 | 0            | 0 | 2 |
| 1. 69E-04 0 0 | Q3KRE8             | 6     | 0            | 0 | 2 |



|               |                    |       |              |   |   |
|---------------|--------------------|-------|--------------|---|---|
| 6. 45E-03 0 0 | P85108/Q3KRE8/Q4QF | 6     | 0 15. 994919 | 0 | 2 |
| 4. 73E-01 0 0 | P85108/Q3KRE8/Q6P9 | 8. 46 | 0            | 0 | 2 |
| 7. 18E-04 0 0 | P85108/Q3KRE8      | 8. 75 | 0            | 0 | 2 |
| 1. 44E-02 0 0 | P85108/Q3KRE8/Q6P9 | 4. 14 | 0 15. 994919 | 0 | 2 |
| 1. 09E-03 0 0 | P85108/Q3KRE8/Q6P9 | 4. 14 | 0            | 0 | 2 |
| 1. 28E-02 0 0 | P85108/Q3KRE8/Q6P9 | 4. 68 | 1            | 0 | 2 |
| 6. 17E-02 0 0 | P85108/Q3KRE8/Q4QF | 9. 75 | 0 15. 994919 | 0 | 2 |
| 8. 16E-05 0 0 | P85108/Q3KRE8/Q4QF | 9. 75 | 0            | 0 | 2 |
| 1. 14E-01 0 0 | P85108/Q3KRE8/P698 | 6. 73 | 0            | 0 | 2 |
| 2. 43E-05 0 0 | P85108/Q3KRE8/Q6P9 | 5. 75 | 0            | 0 | 2 |
| 3. 31E-04 0 0 | P85108/Q3KRE8/Q4QF | 5. 83 | 0 15. 994919 | 0 | 2 |
| 2. 30E-04 0 0 | P85108/Q3KRE8/Q4QF | 5. 83 | 0            | 0 | 2 |
| 4. 37E-04 0 0 | P85108/Q3KRE8/Q6P9 | 6     | 0            | 0 | 2 |
| 3. 71E-04 0 0 | P85108/Q3KRE8/Q4QF | 5. 84 | 0            | 0 | 2 |
| 2. 44E-04 0 0 | P85108/Q3KRE8/Q4QF | 5. 84 | 0            | 0 | 2 |
| 5. 14E-03 0 0 | P85108/Q3KRE8/Q4QF | 5. 84 | 0            | 0 | 2 |
| 1. 28E-06 0 0 | Q4QRB4/Q6P9T8/P698 | 8. 75 | 0            | 0 | 2 |
| 6. 45E-03 0 0 | P85108/Q3KRE8/Q4QF | 6     | 0 15. 994919 | 0 | 2 |
| 4. 73E-01 0 0 | P85108/Q3KRE8/Q6P9 | 8. 46 | 0            | 0 | 2 |
| 1. 94E-04 0 0 | P68370/Q6P9V9/Q6AY | 5. 84 | 0            | 0 | 2 |
| 5. 87E-05 0 0 | P68370/Q6P9V9/Q6AY | 4. 03 | 0            | 0 | 2 |
| 3. 63E-04 0 0 | P68370/Q6P9V9/Q6AY | 4. 03 | 0            | 0 | 2 |
| 2. 84E-02 0 0 | P68370/Q6P9V9/Q6AY | 5. 84 | 0            | 0 | 2 |
| 3. 75E-04 0 0 | P68370/Q6P9V9/Q6AY | 4. 03 | 0            | 0 | 2 |
| 7. 28E-03 0 0 | P68370/Q6P9V9/Q68F | 5. 81 | 0            | 0 | 2 |
| 3. 34E-08 0 0 | P68370/Q6P9V9/Q6AY | 3. 92 | 0            | 0 | 2 |
| 1. 55E-02 0 0 | P68370/Q6P9V9/Q6AY | 4. 03 | 0            | 0 | 2 |
| 5. 69E-04 0 0 | P68370/Q6P9V9/Q6AY | 5. 84 | 0            | 0 | 2 |
| 1. 39E-02 0 0 | P68370/Q6P9V9/Q6AY | 6. 07 | 0            | 0 | 2 |
| 2. 65E-05 0 0 | P68370/Q6P9V9/Q6AY | 6. 07 | 0            | 0 | 2 |
| 2. 30E-06 0 0 | P68370/Q6P9V9/Q6AY | 6. 75 | 0            | 0 | 2 |
| 2. 35E-03 0 0 | P68370/Q6P9V9/Q6AY | 6. 75 | 0            | 0 | 2 |
| 6. 17E-02 0 0 | P85108/Q3KRE8/Q4QF | 9. 75 | 0 15. 994919 | 0 | 2 |
| 8. 16E-05 0 0 | P85108/Q3KRE8/Q4QF | 9. 75 | 0            | 0 | 2 |
| 3. 31E-04 0 0 | P85108/Q3KRE8/Q4QF | 5. 83 | 0 15. 994919 | 0 | 2 |
| 2. 30E-04 0 0 | P85108/Q3KRE8/Q4QF | 5. 83 | 0            | 0 | 2 |
| 4. 37E-04 0 0 | P85108/Q3KRE8/Q6P9 | 6     | 0            | 0 | 2 |
| 1. 95E-02 0 0 | P85108/Q3KRE8/Q4QF | 4. 03 | 0 15. 994919 | 0 | 2 |
| 3. 71E-04 0 0 | P85108/Q3KRE8/Q4QF | 5. 84 | 0            | 0 | 2 |
| 2. 44E-04 0 0 | P85108/Q3KRE8/Q4QF | 5. 84 | 0            | 0 | 2 |
| 5. 14E-03 0 0 | P85108/Q3KRE8/Q4QF | 5. 84 | 0            | 0 | 2 |
| 1. 28E-06 0 0 | Q4QRB4/Q6P9T8/P698 | 8. 75 | 0            | 0 | 2 |
| 6. 45E-03 0 0 | P85108/Q3KRE8/Q4QF | 6     | 0 15. 994919 | 0 | 2 |
| 2. 37E-05 0 0 | Q4QRB4             | 6. 75 | 0            | 0 | 2 |
| 1. 23E-04 0 0 | Q4QRB4             | 6. 75 | 0            | 0 | 2 |
| 7. 94E-03 0 0 | F1LQW3/Q4KM71      | 4. 03 | 0            | 0 | 2 |
| 3. 56E-04 0 0 | F1LQW3/Q4KM71      | 9. 8  | 0            | 0 | 2 |
| 7. 29E-02 0 0 | F1LQW3/Q4KM71      | 4. 37 | 0            | 0 | 2 |

|          |     |                    |      |   |   |   |
|----------|-----|--------------------|------|---|---|---|
| 4.09E-05 | 0 0 | Q5FVM4/F1LQW3/Q4KM | 4.21 | 0 | 0 | 2 |
| 2.46E-03 | 0 0 | Q5FVM4/F1LQW3/Q4KM | 4.21 | 0 | 0 | 2 |
| 1.15E-03 | 0 0 | F1LQW3/Q4KM71      | 9.76 | 0 | 0 | 2 |
| 2.53E-04 | 0 0 | F1LQW3/Q4KM71      | 9.76 | 0 | 0 | 2 |
| 2.46E-06 | 0 0 | F1LQW3/Q4KM71      | 3.92 | 0 | 0 | 2 |
| 1.06E-01 | 0 0 | F1LQW3/Q4KM71/0547 | 4.75 | 0 | 0 | 2 |
|          |     |                    |      |   |   |   |
| 2.84E-02 | 0 0 | P68370/Q6P9V9/Q6AY | 5.84 | 0 | 0 | 2 |
| 7.28E-03 | 0 0 | P68370/Q6P9V9/Q68F | 5.81 | 0 | 0 | 2 |
| 1.55E-02 | 0 0 | P68370/Q6P9V9/Q6AY | 4.03 | 0 | 0 | 2 |
| 4.23E-01 | 0 0 | Q6AY56             | 5.38 | 1 | 0 | 2 |
| 1.39E-02 | 0 0 | P68370/Q6P9V9/Q6AY | 6.07 | 0 | 0 | 2 |
| 2.65E-05 | 0 0 | P68370/Q6P9V9/Q6AY | 6.07 | 0 | 0 | 2 |
| 2.30E-06 | 0 0 | P68370/Q6P9V9/Q6AY | 6.75 | 0 | 0 | 2 |
| 2.35E-03 | 0 0 | P68370/Q6P9V9/Q6AY | 6.75 | 0 | 0 | 2 |
|          |     |                    |      |   |   |   |
| 7.14E-04 | 0 0 | Q8K4V4/MORBS9/G3V8 | 5.84 | 0 | 0 | 2 |
| 5.36E-02 | 0 0 | Q8K4V4/MORBS9      | 5.72 | 0 | 0 | 2 |
| 5.81E-02 | 0 0 | Q8K4V4/MORBS9/G3V8 | 6.1  | 0 | 0 | 2 |
| 6.74E-02 | 0 0 | Q8K4V4/MORBS9/G3V8 | 4.25 | 0 | 0 | 2 |
| 1.85E-03 | 0 0 | Q8K4V4/MORBS9      | 6    | 0 | 0 | 2 |
| 2.53E-07 | 0 0 | Q8K4V4/MORBS9      | 5.4  | 0 | 0 | 2 |
|          |     |                    |      |   |   |   |
| 8.13E-03 | 0 0 | Q5FVM4             | 4.37 | 0 | 0 | 2 |
| 4.09E-05 | 0 0 | Q5FVM4/F1LQW3/Q4KM | 4.21 | 0 | 0 | 2 |
| 2.46E-03 | 0 0 | Q5FVM4/F1LQW3/Q4KM | 4.21 | 0 | 0 | 2 |
| 3.54E-05 | 0 0 | Q5FVM4             | 8.26 | 0 | 0 | 2 |
| 5.70E-04 | 0 0 | Q5FVM4             | 8.26 | 0 | 0 | 2 |
| 6.72E-04 | 0 0 | Q5FVM4             | 4.53 | 0 | 0 | 2 |
| 2.18E-06 | 0 0 | Q5FVM4             | 4.75 | 0 | 0 | 2 |
|          |     |                    |      |   |   |   |
| 3.12E-05 | 0 0 | P62630/MOR757/F1M6 | 4.68 | 0 | 0 | 2 |
| 7.43E-02 | 0 0 | P62630/P62632/MOR7 | 8.75 | 0 | 0 | 2 |
| 6.46E-04 | 0 0 | P62630/P62632/MOR7 | 8.33 | 0 | 0 | 2 |
| 5.38E-03 | 0 0 | P62630/MOR757/MOR7 | 6.74 | 0 | 0 | 2 |
| 1.57E-04 | 0 0 | P62630/MOR757/MOR7 | 6.74 | 0 | 0 | 2 |
| 5.07E-05 | 0 0 | P62630/MOR757/F1M6 | 8.75 | 0 | 0 | 2 |
|          |     |                    |      |   |   |   |
| 2.20E-02 | 0 0 | Q6IG01/Q6IG00/Q6P6 | 5.84 | 0 | 0 | 2 |
| 3.53E-05 | 0 0 | P47819/Q6IG03/Q6IC | 4.37 | 0 | 0 | 2 |
| 2.81E-04 | 0 0 | Q6IG02/Q6IG00/Q6IC | 4.25 | 0 | 0 | 2 |
| 1.26E-02 | 0 0 | Q6IG00/Q6IG05/Q6IF | 6.14 | 1 | 0 | 2 |
| 7.27E-06 | 0 0 | Q6P6Q2/Q4FZU2/Q6IC | 4.03 | 0 | 0 | 2 |
|          |     |                    |      |   |   |   |
| 2.20E-04 | 0 0 | P48721/F1M953      | 3.84 | 0 | 0 | 2 |
| 1.11E-04 | 0 0 | P48721/MOR972/F1M9 | 4.53 | 0 | 0 | 2 |
| 1.30E-05 | 0 0 | P48721/F1M953      | 5.81 | 0 | 0 | 2 |
| 1.19E-03 | 0 0 | P48721/F1M953      | 4.37 | 0 | 0 | 2 |
| 4.46E-03 | 0 0 | P48721/MOR972/F1M9 | 4.37 | 0 | 0 | 2 |

|               |                    |       |   |   |   |
|---------------|--------------------|-------|---|---|---|
| 3. 19E-02 0 0 | P63018/MOR8M9/MORL | 5. 84 | 0 | 0 | 2 |
| 2. 16E-02 0 0 | P14659/P63018/F1LZ | 5. 84 | 0 | 0 | 2 |
| 5. 26E-03 0 0 | P63018/D3ZH98/MORL | 5. 84 | 0 | 0 | 2 |
| 2. 00E-04 0 0 | P14659/P63018/MORL | 4. 14 | 0 | 0 | 2 |
| 2. 92E-08 0 0 | P06761 ! P55063 !  | 4. 37 | 0 | 0 | 2 |
| 2. 20E-02 0 0 | Q6IG01/Q6IG00/Q6P6 | 5. 84 | 0 | 0 | 2 |
| 7. 80E-04 0 0 | Q6IG01/Q6P6Q2/Q107 | 6. 18 | 2 | 0 | 2 |
| 3. 92E-04 0 0 | Q6IG01/Q6P6Q2/Q107 | 6. 18 | 2 | 0 | 2 |
| 1. 26E-02 0 0 | Q6IG00/Q6IG05/Q6IF | 6. 14 | 1 | 0 | 2 |
| 7. 27E-06 0 0 | Q6P6Q2/Q4FZU2/Q6IC | 4. 03 | 0 | 0 | 2 |
| 2. 49E-05 0 0 | P47727/MOR3X6/Q9QZ | 8. 07 | 0 | 0 | 2 |
| 1. 43E-04 0 0 | P47727/MOR3X6/AOAC | 6     | 0 | 0 | 2 |
| 1. 79E-02 0 0 | P47727/B2GV72/MORL | 5. 21 | 0 | 0 | 2 |
| 8. 83E-02 0 0 | P47727/B2GV72/MORL | 5. 21 | 0 | 0 | 2 |
| 2. 52E-07 0 0 | P47727/MOR3X6      | 4. 09 | 0 | 0 | 2 |
| 3. 25E-06 0 0 | P15205/F1LRL9/BOBN | 4. 37 | 0 | 0 | 2 |
| 8. 52E-02 0 0 | P15205/F1LRL9      | 5. 66 | 0 | 0 | 2 |
| 5. 35E-03 0 0 | P34926/P15205/G3V7 | 4. 37 | 0 | 0 | 2 |
| 1. 20E-02 0 0 | P15205/F1LRL9/BOBN | 6. 74 | 0 | 0 | 2 |
| 8. 97E-02 0 0 | P97576             | 4. 8  | 0 | 0 | 2 |
| 7. 21E-03 0 0 | P97576             | 4. 8  | 0 | 0 | 2 |
| 2. 73E-05 0 0 | P97576             | 4. 37 | 0 | 0 | 2 |
| 1. 99E-06 0 0 | P97576             | 11    | 0 | 0 | 2 |
| 1. 72E-03 0 0 | P01946/B1H216      | 5. 16 | 0 | 0 | 2 |
| 3. 81E-04 0 0 | P01946/B1H216      | 4. 75 | 0 | 0 | 2 |
| 1. 64E-03 0 0 | P01946/B1H216      | 8. 5  | 0 | 0 | 2 |
| 1. 39E-02 0 0 | P02091/P11517/Q626 | 5. 32 | 0 | 0 | 2 |
| 1. 48E-04 0 0 | P02091/P11517      | 5. 81 | 0 | 0 | 2 |
| 9. 15E-08 0 0 | P11517             | 4. 37 | 0 | 0 | 2 |
| 2. 94E-03 0 0 | Q63716             | 4. 21 | 0 | 0 | 2 |
| 1. 56E-01 0 0 | Q63716             | 8. 76 | 0 | 0 | 2 |
| 5. 83E-02 0 0 | Q63716             | 4. 37 | 0 | 0 | 2 |
| 6. 97E-04 0 0 | Q9JJ54             | 4. 14 | 0 | 0 | 2 |
| 8. 01E-02 0 0 | Q9JJ54             | 5. 84 | 0 | 0 | 2 |
| 5. 84E-02 0 0 | Q3SWU3/MORAX7/MORL | 8. 75 | 0 | 0 | 2 |
| 3. 88E-02 0 0 | P60711/P63259/D3ZF | 4. 21 | 0 | 0 | 2 |
| 7. 31E-06 0 0 | P62738/P60711/P68C | 4. 14 | 0 | 0 | 2 |
| 1. 34E-04 0 0 | P62738/P60711/P68C | 8. 76 | 0 | 0 | 2 |

|               |                    |       |   |   |   |
|---------------|--------------------|-------|---|---|---|
| 1. 80E-01 0 0 | D3ZH98             | 4. 03 | 0 | 0 | 2 |
| 6. 84E-02 0 0 | D3ZH98             | 4. 03 | 0 | 0 | 2 |
| 5. 26E-03 0 0 | P63018/D3ZH98/MORF | 5. 84 | 0 | 0 | 2 |
| 2. 08E-03 0 0 | D3ZN95             | 5. 4  | 0 | 0 | 2 |
| 2. 02E-04 0 0 | D3ZN95             | 6     | 0 | 0 | 2 |
| 1. 28E-01 0 0 | D3ZPW4             | 4. 37 | 0 | 0 | 2 |
| 6. 84E-02 0 0 | 088453/MORBF0 ! D4 | 5. 81 | 0 | 0 | 2 |
| 5. 92E-03 0 0 | P04256/Q5IOM7/Q6P6 | 6. 85 | 0 | 0 | 2 |
| 3. 10E-03 0 0 | P04256/Q5IOM7/Q6P6 | 4. 13 | 0 | 0 | 2 |
| 1. 83E-02 0 0 | P00762             | 5. 51 | 2 | 0 | 2 |
| 4. 58E-08 0 0 | P00762             | 4. 4  | 0 | 0 | 2 |
| 4. 58E-02 0 0 | P04905/P08010/G3V9 | 5. 83 | 0 | 0 | 2 |
| 6. 24E-05 0 0 | P04905/G3V983/Q6LL | 4. 21 | 0 | 0 | 2 |
| 2. 92E-08 0 0 | P06761 ! P55063 !  | 4. 37 | 0 | 0 | 2 |
| 2. 33E-04 0 0 | P06761             | 6. 07 | 1 | 0 | 2 |
| 3. 86E-04 0 0 | P35704             | 8. 31 | 0 | 0 | 2 |
| 2. 78E-03 0 0 | P35704             | 5. 84 | 0 | 0 | 2 |
| 3. 76E-06 0 0 | P04797/MOR590/D3ZC | 4     | 0 | 0 | 2 |
| 6. 94E-04 0 0 | P04797/D3ZEN2/MOR6 | 8. 75 | 0 | 0 | 2 |
| 3. 33E-04 0 0 | P15146/Q78DZ1/F1LN | 5. 84 | 0 | 0 | 2 |
| 2. 96E-02 0 0 | P15146/F1LNK0/F1MA | 4. 53 | 0 | 0 | 2 |
| 6. 24E-04 0 0 | Q6AYI1/B6DTP5      | 4. 53 | 0 | 0 | 2 |
| 7. 20E-04 0 0 | Q6AYI1/B6DTP5      | 4. 37 | 0 | 0 | 2 |
| 2. 68E-02 0 0 | Q9JLT0/G3V9Y1      | 4. 57 | 1 | 0 | 2 |
| 1. 73E-01 0 0 | Q9JLT0/Q63862/Q628 | 4. 68 | 1 | 0 | 2 |
| 1. 67E-02 0 0 | D4A8X8             | 4. 37 | 0 | 0 | 2 |
| 6. 04E-03 0 0 | D4A8X8             | 4. 37 | 0 | 0 | 2 |

|               |                    |       |              |   |   |
|---------------|--------------------|-------|--------------|---|---|
| 9. 82E-03 0 0 | D4A8X8             | 4. 37 | 0            | 0 | 2 |
| 1. 74E-02 0 0 | D4A8X8             | 4. 37 | 0            | 0 | 2 |
| 3. 83E-03 0 0 | D4A8X8             | 4. 37 | 0            | 0 | 2 |
| 8. 22E-03 0 0 | D4A8X8             | 4. 37 | 0            | 0 | 2 |
| 1. 01E-02 0 0 | D4A8X8             | 4. 37 | 0            | 0 | 2 |
| 2. 75E-02 0 0 | D4A8X8             | 4. 37 | 0            | 0 | 2 |
| 8. 32E-03 0 0 | D4A8X8             | 4. 37 | 0            | 0 | 2 |
| 1. 50E-01 0 0 | D4A8X8             | 4. 37 | 0            | 0 | 2 |
|               |                    |       |              |   |   |
| 8. 77E-02 0 0 | D4A4U8             | 8. 69 | 1            | 0 | 2 |
| 2. 05E-01 0 0 | D4A4U8             | 8. 69 | 1            | 0 | 2 |
| 1. 01E-01 0 0 | D4A4U8             | 8. 69 | 1            | 0 | 2 |
|               |                    |       |              |   |   |
| 2. 91E-01 0 0 | MORA91             | 8. 75 | 1            | 0 | 2 |
| 4. 80E-01 0 0 | MORA91             | 8. 75 | 1            | 0 | 2 |
| 3. 06E-01 0 0 | MORA91             | 8. 75 | 1            | 0 | 2 |
|               |                    |       |              |   |   |
| 2. 12E-01 0 0 | Q4KLM0             | 6     | 0            | 0 | 2 |
| 4. 47E-01 0 0 | Q4KLM0             | 6     | 0            | 0 | 2 |
| 4. 37E-01 0 0 | Q4KLM0             | 6     | 0            | 0 | 2 |
|               |                    |       |              |   |   |
| 2. 74E-01 0 0 | D3ZB99             | 6     | 0            | 0 | 2 |
| 3. 59E-01 0 0 | D3ZB99             | 6     | 0            | 0 | 2 |
|               |                    |       |              |   |   |
| 6. 84E-02 0 0 | D4A7T9             | 5. 84 | 2            | 0 | 2 |
| 1. 18E-01 0 0 | D4A7T9             | 5. 84 | 2            | 0 | 2 |
|               |                    |       |              |   |   |
| 1. 95E-01 0 0 | Q8VIP2/C7C5T1      | 5. 88 | 0            | 0 | 2 |
| 1. 65E-01 0 0 | Q8VIP2/C7C5T1      | 5. 88 | 0            | 0 | 2 |
|               |                    |       |              |   |   |
| 2. 09E-01 0 0 | A0JN13             | 4. 56 | 1            | 0 | 2 |
|               |                    |       |              |   |   |
| 3. 26E-01 0 0 | A1A5R0/F1LPJ8      | 8. 59 | 0            | 0 | 2 |
|               |                    |       |              |   |   |
| 2. 84E-01 0 0 | A1L1J7             | 4. 37 | 0            | 0 | 2 |
|               |                    |       |              |   |   |
| 2. 52E-01 0 0 | A5I9F0/Q9WUL3/F1LF | 6     | 0            | 0 | 2 |
|               |                    |       |              |   |   |
| 1. 69E-01 0 0 | BOBN75             | 4. 79 | 1            | 0 | 2 |
|               |                    |       |              |   |   |
| 6. 93E-02 0 0 | BOBNK9             | 11    | 1            | 0 | 2 |
|               |                    |       |              |   |   |
| 1. 42E-01 0 0 | BOBNM8             | 8. 59 | 1 15. 994919 | 0 | 2 |
|               |                    |       |              |   |   |
| 2. 72E-02 0 0 | Q5U2W6 ! B1WBTO    | 4. 37 | 0 15. 994919 | 0 | 2 |
|               |                    |       |              |   |   |
| 9. 91E-01 0 0 | B1WBX7/G3V8Q1      | 4. 03 | 0            | 0 | 2 |

|              |                    |       |   |           |   |
|--------------|--------------------|-------|---|-----------|---|
| 3.92E-02 0 0 | B2GUW2             | 9.47  | 0 | 0         | 2 |
| 8.22E-02 0 0 | P04906/B6DYQ7/D4A8 | 5.59  | 0 | 0         | 2 |
| 1.26E-02 0 0 | G3V6F8/COLP03      | 6     | 0 | 0         | 2 |
| 6.64E-02 0 0 | P81795/C9WPN6/W8CE | 4.53  | 0 | 0         | 2 |
| 3.35E-02 0 0 | D3Z8B0             | 9.72  | 0 | 0         | 2 |
| 1.66E-01 0 0 | D3Z954             | 12    | 1 | 15.994919 | 2 |
| 1.31E-02 0 0 | D3ZE49/MOR780      | 5.84  | 0 | 0         | 2 |
| 1.18E-01 0 0 | D3ZFN9             | 10.84 | 2 | 0         | 2 |
| 1.02E-02 0 0 | D3ZFQ7             | 11    | 1 | 0         | 2 |
| 3.94E-01 0 0 | D4A2P1/D3ZG47      | 9.99  | 2 | 0         | 2 |
| 7.13E-02 0 0 | Q6MG97/A0A0A0MY44  | 8.22  | 0 | 0         | 2 |
| 3.36E-01 0 0 | D3ZH42             | 8.72  | 0 | 0         | 2 |
| 2.48E-02 0 0 | D3ZHF9/A0A096MK16  | 11    | 1 | 0         | 2 |
| 1.89E-01 0 0 | D3ZI44             | 6.24  | 1 | 0         | 2 |
| 7.02E-01 0 0 | D3ZNQ2             | 8.75  | 1 | 15.994919 | 2 |

|              |                    |      |   |           |   |
|--------------|--------------------|------|---|-----------|---|
| 3.83E-01 0 0 | D3ZPP5             | 4.53 | 0 | 0         | 2 |
| 1.77E-01 0 0 | A0JPL2/D3ZRE3      | 8.8  | 0 | 0         | 2 |
| 2.99E-01 0 0 | D3ZXS4             | 6.92 | 1 | 0         | 2 |
| 5.19E-01 0 0 | D3ZYM5             | 5.81 | 0 | 0         | 2 |
| 9.87E-02 0 0 | D4A0G9             | 6.1  | 0 | 0         | 2 |
| 3.57E-01 0 0 | D4A1X2/D4A2C3/MORE | 6.1  | 0 | 0         | 2 |
| 1.14E-02 0 0 | D4A3X1             | 8.26 | 0 | 0         | 2 |
| 2.65E-01 0 0 | D4A5W5             | 12   | 1 | 0         | 2 |
| 2.07E-01 0 0 | D4A6C6             | 9.72 | 0 | 0         | 2 |
| 1.90E-01 0 0 | D4A7X9             | 9.2  | 2 | 0         | 2 |
| 3.36E-02 0 0 | D4A961             | 9.75 | 0 | 0         | 2 |
| 5.87E-02 0 0 | D4A9Q5             | 6.86 | 1 | 0         | 2 |
| 5.26E-02 0 0 | A2VD13/D4AA10      | 5.84 | 0 | 0         | 2 |
| 1.47E-02 0 0 | F1LZH7/D4AAW3      | 5.84 | 0 | 0         | 2 |
| 3.32E-02 0 0 | Q9JKB5/F1LYA4 ! D4 | 4.37 | 0 | 15.994919 | 2 |
| 1.15E-01 0 0 | D4ADZ9             | 4.78 | 1 | 0         | 2 |
| 3.59E-02 0 0 | Q9QX19/E9PSL7      | 5.81 | 0 | 0         | 2 |
| 6.36E-01 0 0 | POC6C0/F1LNS0      | 6    | 0 | 0         | 2 |
| 5.30E-04 0 0 | F1LNS7             | 4.03 | 0 | 0         | 2 |
| 2.61E-01 0 0 | P54256/F1LQG0      | 4.53 | 0 | 0         | 2 |
| 5.83E-01 0 0 | Q68A21/F1LSL1 ! F1 | 5.84 | 0 | 0         | 2 |

|               |                    |      |   |           |   |
|---------------|--------------------|------|---|-----------|---|
| 1. 24E-05 0 0 | P62752/B5DES1/D3Z1 | 3.93 | 0 | 0         | 2 |
| 5. 79E-02 0 0 | D3ZJ92 ! F1LTJ8    | 8.85 | 1 | 0         | 2 |
| 2. 64E-02 0 0 | Q62826/F1M3D3/F1LV | 6    | 0 | 0         | 2 |
| 4. 56E-01 0 0 | P97603/F1M4H1/F1LW | 8.5  | 1 | 15.994919 | 2 |
| 1. 30E-01 0 0 | F1LXQ8/F1M784/B5DF | 8.59 | 2 | 0         | 2 |
| 2. 26E-03 0 0 | P60517/Q0VGK0 ! P6 | 5.97 | 0 | 0         | 2 |
| 8. 26E-03 0 0 | F1M6F6/F1LZT6/F1M7 | 4.53 | 0 | 0         | 2 |
| 4. 34E-02 0 0 | F1M832/F1LMZ3/F1LF | 6    | 0 | 0         | 2 |
| 2. 67E-02 0 0 | F1M8N8 ! Q80XZ1/MC | 9.5  | 0 | 0         | 2 |
| 2. 84E-02 0 0 | F1M9D3/Q9QZG4      | 9.47 | 0 | 0         | 2 |
| 1. 30E-01 0 0 | F1MAP9             | 5.72 | 0 | 0         | 2 |



|              |                    |      |   |   |   |
|--------------|--------------------|------|---|---|---|
| 5.63E-01 0 0 | P04167/F1LSA2/F7FE | 8.29 | 1 | 0 | 2 |
| 2.83E-01 0 0 | G3V811             | 8.41 | 1 | 0 | 2 |
| 9.96E-02 0 0 | Q9ESQ7/G3V8J5      | 6    | 0 | 0 | 2 |
| 1.02E-01 0 0 | G3V931             | 5.72 | 0 | 0 | 2 |
| 9.53E-03 0 0 | G3V8E3/G3V9E7      | 6.14 | 1 | 0 | 2 |
| 4.81E-06 0 0 | Q8VHV7/G3V9Q3/D3ZY | 4.37 | 0 | 0 | 2 |
| 2.32E-01 0 0 | MOR4F6             | 8.6  | 0 | 0 | 2 |
| 2.41E-02 0 0 | MOR4Q5/Q5U218      | 12   | 1 | 0 | 2 |
| 8.99E-04 0 0 | Q00729/Q00715/D3ZW | 6.75 | 0 | 0 | 2 |
| 6.88E-01 0 0 | MORC73 ! MORBW6    | 5.84 | 0 | 0 | 2 |
| 1.33E-01 0 0 | MORC53             | 6.07 | 1 | 0 | 2 |
| 3.26E-01 0 0 | F1M4F3/MOR3L1/MORC | 8.59 | 2 | 0 | 2 |

|               |                    |       |   |   |   |
|---------------|--------------------|-------|---|---|---|
| 3. 27E-02 0 0 | Q5PPN7 ! 008721/Q7 | 8. 75 | 0 | 0 | 2 |
| 3. 03E-01 0 0 | G3V6A2 ! 055157/F1 | 6     | 0 | 0 | 2 |
| 5. 16E-01 0 0 | 088181             | 12    | 0 | 0 | 2 |
| 1. 98E-02 0 0 | Q9QX80/Q9QX81/0883 | 8. 75 | 0 | 0 | 2 |
| 5. 24E-04 0 0 | P07936             | 3. 83 | 0 | 0 | 2 |
| 1. 80E-01 0 0 | P14925/F1LPH3/D4A1 | 8. 47 | 0 | 0 | 2 |
| 2. 29E-01 0 0 | P29314/D3ZV50      | 6     | 0 | 0 | 2 |
| 5. 05E-07 0 0 | P42123             | 8. 22 | 0 | 0 | 2 |
| 5. 42E-02 0 0 | P47942             | 5. 72 | 0 | 0 | 2 |
| 7. 55E-03 0 0 | P59215/D4ABT0      | 4. 03 | 0 | 0 | 2 |
| 2. 81E-01 0 0 | P59382             | 11    | 2 | 0 | 2 |
| 2. 37E-01 0 0 | P63155             | 6. 14 | 1 | 0 | 2 |
| 4. 48E-05 0 0 | P68101             | 3. 92 | 0 | 0 | 2 |
| 2. 93E-05 0 0 | Q05175             | 4. 53 | 0 | 0 | 2 |
| 1. 50E-01 0 0 | Q05683             | 4     | 0 | 0 | 2 |
| 1. 95E-01 0 0 | Q2KP10             | 4. 79 | 1 | 0 | 2 |
| 1. 01E-01 0 0 | Q32Q90 ! D4A3V2    | 5. 84 | 0 | 0 | 2 |
| 1. 06E-02 0 0 | Q499N4             | 12    | 1 | 0 | 2 |
| 8. 52E-04 0 0 | Q4KLH4             | 3. 92 | 0 | 0 | 2 |
| 4. 07E-01 0 0 | Q4V7D6/Q4V8D5      | 8. 64 | 0 | 0 | 2 |

|               |                                |      |   |           |   |
|---------------|--------------------------------|------|---|-----------|---|
| 1. 52E-01 0 0 | Q4V8H9                         | 6.75 | 0 | 0         | 2 |
| 1. 53E-03 0 0 | Q5EB59                         | 11   | 1 | 0         | 2 |
| 1. 75E-01 0 0 | Q5FWY5                         | 5.97 | 0 | 0         | 2 |
| 3. 05E-02 0 0 | Q5M852                         | 8.75 | 0 | 0         | 2 |
| 3. 12E-01 0 0 | Q5M9I6/B1WC47                  | 10   | 1 | 0         | 2 |
| 6. 34E-02 0 0 | Q5PQL3 ! B1H292                | 8.75 | 0 | 0         | 2 |
| 2. 40E-01 0 0 | Q5U2V4                         | 9.4  | 2 | 15.994919 | 2 |
| 4. 37E-02 0 0 | Q5XIK6                         | 6    | 0 | 0         | 2 |
| 1. 36E-01 0 0 | Q5YLM1                         | 5.84 | 0 | 0         | 2 |
| 9. 54E-07 0 0 | Q63092/F1LR80                  | 4.25 | 0 | 0         | 2 |
| 1. 95E-03 0 0 | Q63396                         | 3.84 | 0 | 0         | 2 |
| 7. 75E-02 0 0 | Q63624                         | 5.84 | 0 | 0         | 2 |
| 1. 02E-01 0 0 | Q64620                         | 6.12 | 1 | 0         | 2 |
| 5. 46E-02 0 0 | Q6QI30                         | 10.3 | 2 | 0         | 2 |
| 7. 73E-02 0 0 | Q6WRH9/G3V7S1                  | 6.19 | 1 | 0         | 2 |
| 9. 56E-02 0 0 | Q71DI1                         | 3.92 | 0 | 0         | 2 |
| 1. 55E-08 0 0 | P62961/D3ZEVO/Q3Z <sup>A</sup> | 4.25 | 0 | 0         | 2 |
| 2. 66E-04 0 0 | P63170/Q78P75                  | 6.75 | 0 | 0         | 2 |
| 6. 10E-02 0 0 | Q7TMA9 ! F1M9H4                | 9.75 | 0 | 0         | 2 |
| 7. 72E-02 0 0 | Q8CGZ2                         | 4.53 | 0 | 0         | 2 |
| 2. 70E-01 0 0 | Q920A6                         | 11   | 1 | 0         | 2 |
| 5. 20E-06 0 0 | Q9EPH2                         | 4.53 | 0 | 0         | 2 |

|              |                    |      |             |   |   |
|--------------|--------------------|------|-------------|---|---|
| 3.00E-01 0 0 | Q9ER33/Q9ER32/FILF | 5.66 | 0           | 0 | 2 |
| 1.10E-01 0 0 | Q9ESV7             | 8.59 | 2           | 0 | 2 |
| 2.16E-01 0 0 | Q9JKF8             | 8.75 | 0           | 0 | 2 |
| 6.31E-02 0 0 | Q9JMD2             | 8.59 | 1           | 0 | 2 |
| 1.06E-04 0 0 | Q9QX69             | 4.37 | 0           | 0 | 2 |
|              |                    |      |             |   |   |
| 3.57E-01 0 0 | Q9QZM6/D3ZTIO/FILN | 11.7 | 2 15.994919 | 0 | 2 |
| 1.88E-01 0 0 | Q9QZR8/F1M785      | 6.14 | 1 15.994919 | 0 | 2 |

useTermini
